# Supplementary material for: Physical activity interventions for adults who are visually impaired: a systematic review and meta-analysis
Source: PubMed Central journal article supplement — BMJ Open. 2020 Feb 12;10(2):e034036. doi: 10.1136/bmjopen-2019-034036 (PMC7045169; doi:10.1136/bmjopen-2019-034036), 2020-02-12
Supplement: bmjopen-2019-034036.draft_revisions.pdf [file bmjopen-2019-034036.draft_revisions.pdf]

# BMJ Open

BMJ Open is committed to open peer review. As part of this commitment we make the peer review history of every article we publish publicly available.

When an article is published we post the peer reviewers' comments and the authors' responses online. We also post the versions of the paper that were used during peer review. These are the versions that the peer review comments apply to.

The versions of the paper that follow are the versions that were submitted during the peer review process. They are not the versions of record or the final published versions. They should not be cited or distributed as the published version of this manuscript.

BMJ Open is an open access journal and the full, final, typeset and author-corrected version of record of the manuscript is available on our site with no access controls, subscription charges or pay-per-view fees (<http://bmjopen.bmj.com>).

If you have any questions on BMJ Open's open peer review process please email [info.bmjopen@bmj.com](mailto:info.bmjopen@bmj.com)

# BMJ Open

## Physical Activity Interventions for Adults who are Visually Impaired: A Systematic Review and Meta-Analysis

|                               |                                                                                                                                                                                                                                                                                                                                                                                                                                                                                                                                                                                                                                                                                                                                                                       |
|-------------------------------|-----------------------------------------------------------------------------------------------------------------------------------------------------------------------------------------------------------------------------------------------------------------------------------------------------------------------------------------------------------------------------------------------------------------------------------------------------------------------------------------------------------------------------------------------------------------------------------------------------------------------------------------------------------------------------------------------------------------------------------------------------------------------|
| Journal:                      | <i>BMJ Open</i>                                                                                                                                                                                                                                                                                                                                                                                                                                                                                                                                                                                                                                                                                                                                                       |
| Manuscript ID                 | bmjopen-2019-034036                                                                                                                                                                                                                                                                                                                                                                                                                                                                                                                                                                                                                                                                                                                                                   |
| Article Type:                 | Original research                                                                                                                                                                                                                                                                                                                                                                                                                                                                                                                                                                                                                                                                                                                                                     |
| Date Submitted by the Author: | 04-Sep-2019                                                                                                                                                                                                                                                                                                                                                                                                                                                                                                                                                                                                                                                                                                                                                           |
| Complete List of Authors:     | Sweeting, Joanna; The University of Sydney, Charles Perkins Centre; The University of Sydney School of Public Health, Prevention Research Collaboration<br>Merom, Dafna; Western Sydney University School of Science and Health, Physical Activity and Health<br>Astuti, Putu; The University of Sydney School of Public Health, Prevention Research Collaboration; Universitas Udayana, Department of Public Health and Faculty of Medicine<br>Antoun, Michael; The University of Sydney, Sydney Dental School<br>Edwards, Kate; The University of Sydney, Charles Perkins Centre; The University of Sydney, Faculty of Health Sciences<br>Ding, Ding; The University of Sydney, Charles Perkins Centre; The University of Sydney, Prevention Research Collaboration |
| Keywords:                     | PUBLIC HEALTH, SPORTS MEDICINE, PREVENTIVE MEDICINE                                                                                                                                                                                                                                                                                                                                                                                                                                                                                                                                                                                                                                                                                                                   |
|                               |                                                                                                                                                                                                                                                                                                                                                                                                                                                                                                                                                                                                                                                                                                                                                                       |

SCHOLARONE™  
Manuscripts

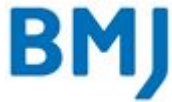

I, the Submitting Author has the right to grant and does grant on behalf of all authors of the Work (as defined in the below author licence), an exclusive licence and/or a non-exclusive licence for contributions from authors who are: i) UK Crown employees; ii) where BMJ has agreed a CC-BY licence shall apply, and/or iii) in accordance with the terms applicable for US Federal Government officers or employees acting as part of their official duties; on a worldwide, perpetual, irrevocable, royalty-free basis to BMJ Publishing Group Ltd ("BMJ") its licensees and where the relevant Journal is co-owned by BMJ to the co-owners of the Journal, to publish the Work in this journal and any other BMJ products and to exploit all rights, as set out in our [licence](#).

The Submitting Author accepts and understands that any supply made under these terms is made by BMJ to the Submitting Author unless you are acting as an employee on behalf of your employer or a postgraduate student of an affiliated institution which is paying any applicable article publishing charge ("APC") for Open Access articles. Where the Submitting Author wishes to make the Work available on an Open Access basis (and intends to pay the relevant APC), the terms of reuse of such Open Access shall be governed by a Creative Commons licence – details of these licences and which [Creative Commons](#) licence will apply to this Work are set out in our licence referred to above.

Other than as permitted in any relevant BMJ Author's Self Archiving Policies, I confirm this Work has not been accepted for publication elsewhere, is not being considered for publication elsewhere and does not duplicate material already published. I confirm all authors consent to publication of this Work and authorise the granting of this licence.

# Physical Activity Interventions for Adults who are Visually Impaired: A Systematic Review and Meta-Analysis

Sweeting, J.<sup>1, 2</sup>, Merom, D.<sup>3</sup>, Astuti, P.A.S.<sup>2, 4</sup>, Antoun, M.<sup>5</sup>, Edwards, K.M.<sup>1, 6</sup>, and Ding, D.<sup>1, 2</sup>

<sup>1</sup> Charles Perkins Centre, the University of Sydney, Camperdown, New South Wales, Australia.

<sup>2</sup> Prevention Research Collaboration, Sydney School of Public Health, the University of Sydney, Camperdown, New South Wales, Australia.

<sup>3</sup> Physical Activity and Health, School of Science and Health, Western Sydney University, Campbelltown, New South Wales, Australia.

<sup>4</sup> Department of Public Health and Faculty of Medicine, Universitas Udayana, Bali, Indonesia.

<sup>5</sup> Sydney Dental School, the University of Sydney, Camperdown, NSW, Australia.

<sup>6</sup> Faculty of Health Sciences, the University of Sydney, Cumberland, New South Wales, Australia.

## Corresponding Author:

Joanna Sweeting

Address: Charles Perkins Centre, University of Sydney, Camperdown, New South Wales, Australia.

Email: [joanna.sweeting@sydney.edu.au](mailto:joanna.sweeting@sydney.edu.au)

Phone: +61 2 8627 1842 (D. Ding)

**Word Count:** 3,765

*I, the Submitting Author has the right to grant and does grant on behalf of all authors of the Work (as defined in the below author licence), an exclusive licence and/or a non-exclusive licence for contributions from authors who are: i) UK Crown employees; ii) where BMJ has agreed a CC-BY licence shall apply, and/or iii) in accordance with the terms applicable for US Federal Government officers or employees acting as part of their official duties; on a worldwide, perpetual, irrevocable, royalty-free basis to BMJ Publishing Group Ltd ("BMJ") its licensees and where the relevant Journal is co-owned by BMJ to the co-owners of the Journal, to publish the Work in BMJ Open and any other BMJ products and to exploit all rights, as set out in our [licence](#).*

## ABSTRACT

Objectives: Compared with sighted individuals, people with visual impairment have a higher prevalence of chronic conditions and lower levels of physical activity. This review aims to systematically review physical activity interventions for those with a visual impairment and to assess their effectiveness.

Design: A systematic review of articles reporting physical activity interventions in visually impaired individuals was conducted. Medline, EMBASE, The Cochrane Library, Cumulative Index to Nursing and Allied Health Literature (CINAHL), SPORTDiscus, and the Physiotherapy Evidence Database (PEDro) were searched in August 2018. Meta-analyses were conducted on randomised controlled trials with the same outcome measure.

Setting: Most interventions were conducted in a group setting, with some including an at-home, self-directed component.

Participants: Following identification of a recent systematic review of physical activity interventions in children, our review focused on adults aged 18 years and older with a visual impairment.

Primary and secondary outcome measures: Outcomes included measures of balance, mobility, mental well-being (e.g. quality of life), number of falls, muscle strength, flexibility, and gait.

Results: Eighteen papers from 17 studies met inclusion criteria. Physical activity components include falls prevention and/or balance-based activities, walking, Tai Chi, Alexander Technique, Yoga, dance, aerobics and core stability training. Significant results were reported most commonly in measures of functional capacity (9/17 studies). The

1  
2 studies identified were generally small and diverse in study design, and risk of bias was  
3  
4 high across several categories for most studies.  
5

6  
7 Conclusions: Physical activity interventions in individuals with visual impairment can have  
8  
9 positive results, particularly in physical measures such as mobility and balance. However,  
10  
11 when performing a meta-analysis of randomised control trials, the evidence for  
12  
13 effectiveness is less clear. More studies with larger sample sizes, stronger designs,  
14  
15 broader age ranges and longer follow-up periods are needed.  
16  
17

18  
19 PROSPERO Registration: PROSPERO CRD42018103638; record available from  
20  
21 [https://www.crd.york.ac.uk/prospero/display\\_record.php?RecordID=103638](https://www.crd.york.ac.uk/prospero/display_record.php?RecordID=103638)  
22  
23

## 24 25 26 27 28 **ARTICLE SUMMARY** 29

30  
31 Strengths and limitations of this study  
32

- 33  
34 • This systematic review was registered a priori and conducted in line with PRISMA  
35  
36 and AMSTAR 2 guidelines.  
37
- 38  
39 • Six databases were used and a back-reference search of all included studies was  
40  
41 conducted.  
42
- 43  
44 • No limits on language or year of publication were imposed.  
45
- 46  
47 • Risk of bias analysis was conducted independently by two reviewers using the  
48  
49 validated Cochrane Collaboration tool.  
50  
51  
52  
53  
54  
55  
56  
57  
58  
59  
60

## INTRODUCTION

Physical activity is well established as a prophylactic for many non-communicable diseases including cardiovascular disease, certain cancers, hypertension and type 2 diabetes.(1, 2) In addition to physical health, regular physical activity is also known to benefit psychological wellbeing including a reduction in the risk of depression and anxiety, lowering of stress levels and improving mood.(3, 4) The Centers for Disease Control and Prevention (CDC) recommends at least 150 minutes per week of moderate-intensity aerobic physical activity (or equivalent vigorous activity) for adults (aged 18-64).(5) However, with the global prevalence of insufficient physical activity at nearly 30% in 2016, it is imperative that regular physical activity continues to be promoted and encouraged worldwide.(6) This is important not only in healthy populations, but also in those with diseases and conditions, such as cardiovascular disease and disabilities such as visual impairment. As highlighted by the CDC in the current physical activity guidelines, there is strong evidence that regular physical activity conveys important health benefits for individuals with a disability.(5) However, adults with disabilities are three times more likely to have chronic conditions such as heart disease, diabetes and cancer, and nearly 50% of adults with a disability undertake no leisure time physical activity.(6) More research among those with specific disabilities is needed to address these gaps and improve health outcomes for those with a disability.(7)

In the United States, the five most common functional disabilities are in mobility, cognition, independent living, hearing and vision.(8) In 2015, an estimated 36 million people worldwide were blind (0.49% of the total population, visual acuity worse than 3/60), 217 million (2.95%) had moderate or severe vision impairment (visual acuity worse than 6/18 and 6/60, respectively) and another 189 million (2.57%) had mild vision impairment (visual acuity worse than 6/12). The most common causes of vision impairment include

1  
2 uncorrected refractive errors, cataracts, age-related macular degeneration, glaucoma, and  
3  
4 diabetic retinopathy.(9)  
5

6  
7 Visual impairment has been shown to detrimentally impact quality of life (10, 11) and to be  
8  
9 associated with depression.(12) Also concerning is the fact that studies have shown a  
10  
11 higher mortality rate for visually impaired individuals compared with their sighted  
12  
13 counterparts, although the underlying reasons are uncertain.(13, 14) Even at the mild end  
14  
15 of the impairment spectrum, loss of vision can affect health and wellbeing, for example,  
16  
17 through restriction of driving, potentially impacting an individual's sense of autonomy and  
18  
19 freedom.(15) Vision impairment has also been shown to be associated with less time  
20  
21 spent in moderate-vigorous physical activity in the range of 26-48% compared to sighted  
22  
23 individuals.(16-18) One potential reason for this discrepancy is the fear of falling  
24  
25 associated with loss of vision and consequent poor balance.(16, 17) For those able to  
26  
27 navigate their local environment with the assistance of a guide dog or cane, physical  
28  
29 barriers such as uneven, slippery or blocked footpaths can make it difficult to perform  
30  
31 adequate physical activity.(19) With the adverse effects that visual impairment can have  
32  
33 on wellbeing, and extra challenges those with visual impairments face, it is of upmost  
34  
35 importance that physical activity is encouraged in this population, given its beneficial  
36  
37 impact on health and wellbeing.  
38  
39  
40  
41  
42  
43  
44

45 To date, few interventions have included participants with vision impairment. In fact, it is  
46  
47 more often the case that visual impairment or blindness are exclusion factors from physical  
48  
49 activity interventions. With increasing recognition of the health disparities experienced by  
50  
51 people living with disabilities and the lack of research by contrast,(20) it is important to  
52  
53 ensure that the principle of inclusiveness is applied so that interventions are designed for  
54  
55 those with disabilities. This review aims to systematically review physical activity  
56  
57 interventions for those with vision impairment and to assess the effectiveness of the  
58  
59  
60



1  
2  
3  
4  
5  
6  
7  
8  
9  
10  
11  
12  
13  
14  
15  
16  
17  
18  
19  
20  
21  
22  
23  
24  
25  
26  
27  
28  
29  
30  
31  
32  
33  
34  
35  
36  
37  
38  
39  
40  
41  
42  
43  
44  
45  
46  
47  
48  
49  
50  
51  
52  
53  
54  
55  
56  
57  
58  
59  
60

interventions in improving health-related (physical and mental) outcomes and issues  
encountered.

For peer review only

## METHODS

### Eligible studies

This systematic review included peer-reviewed articles reporting on physical activity interventions in visually impaired individuals. The research questions, search strategy and inclusion/exclusion criteria were determined prior to commencing the search and the review was registered on the International Prospective Register of Systematic Reviews (PROSPERO CRD42018103638; record available from [https://www.crd.york.ac.uk/prospero/display\\_record.php?RecordID=103638](https://www.crd.york.ac.uk/prospero/display_record.php?RecordID=103638)). Although the initial research plan was to review studies across all age categories, the population of interest was restricted to adults (aged 18 years and over) following the initial search as a recent systematic review among children and adolescents was identified.<sup>(21)</sup> We included experimental studies focusing on a physical activity intervention or those examining interventions with a clear physical activity component. Controls included individuals not exposed to the intervention or the baseline measurements of participants prior to commencement of the intervention (pre-post study design). Both randomised control trials and non-randomised studies of interventions, including pre-post studies without a comparison group, were included to provide a more complete picture of all the studies in the literature, given the small number expected. Observational studies, reviews, case reports, abstracts, commentaries or other opinion pieces were excluded. No limit on publication date or language of publication was set to ensure broad coverage of the literature. Outcome measures included a range of physical measurements, such as body fat percentage, blood pressure, body mass, waist circumference; physical activity/fitness measures such as flexibility, daily step count, balance and muscle strength and endurance; and wellbeing measures including social and emotional wellbeing and depression.

## Sources and Search Strategy

We searched Medline (1946 – August 2018), EMBASE (1947 – August 2018), The Cochrane Library (1993 – August 2018), Cumulative Index to Nursing and Allied Health Literature (CINAHL) (1982 – August 2018), SPORTDiscus (1892 – August 2018), and the Physiotherapy Evidence Database (PEDro) (1929 – August 2018). Back references of all papers included in the review were also searched to identify additional articles. Search terms included those related to blindness and visual impairment (e.g. vision disorders, visually impaired person, glaucoma) and physical activity (e.g. exercise, sports, muscle strength, gait, dancing, and rehabilitation). A targeted search of the Journal of Visual Impairment and Blindness was conducted due to indexing issues discovered during the back-reference search. One article was discovered through this additional search. The final search strategy for Medline is outlined in Supplementary Material 1. This search strategy was adapted for use with the other bibliographic databases in combination with database-specific filters. An initial screen of all abstracts was conducted to identify potentially relevant studies (MA and JS). These studies were then simultaneously and independently reviewed by two reviewers (DD and PASA) to determine eligibility for inclusion in this review, with a third reviewer (DM) enlisted in the case of disagreement.

## Data collection

Data were extracted from the eligible papers by JS and summarised into an Excel spreadsheet with the following headings: Author, Year of Publication, Population (including age) and Setting, Visual Conditions, Exclusion Criteria, Study Design, Control Group, Theory (behind the intervention), Type of Physical Activity Intervention, Dose of Intervention (times per week, duration), Delivery (who delivered the intervention), Outcomes, Process Evaluation (e.g. participation, adherence, drop out, feedback),

1  
2 Results, Other Notes and Funding Sources. We further condensed the extracted data  
3  
4 under the headings seen in Tables 1 and 2. Data extraction was checked by KE with  
5  
6 agreement achieved on all studies through discussion. Data for one paper written in Farsi  
7  
8 was extracted by a collaborator fluent in Farsi.  
9

## 10 11 12 13 14 15 **Analysis**

16  
17  
18 The main characteristics and findings of each study were summarised and tabulated to  
19  
20 provide an overview of the literature to date in this area. Where measures were common  
21  
22 across RCT studies, a meta-analysis was conducted, using R Foundation for Statistical  
23  
24 Computing, version 3.6.0 to estimate the standardised mean difference (SMD) and 95%  
25  
26 confidence interval to assess the effectiveness of the interventions. The  $I^2$  was calculated  
27  
28 as a measure of heterogeneity between studies. This review was conducted in line with  
29  
30 the Preferred Reporting Items for Systematic Reviews and Meta-Analysis (PRISMA)(22)  
31  
32 and A Measurement Tool to Assess Systematic Reviews (AMSTAR2) guidelines (23)  
33  
34 (Supplementary 2 and 3). Risk of bias assessment was performed by JS and PASA, using  
35  
36 the Cochrane Collaboration's tool for assessing risk of bias. This tool was used to rate  
37  
38 each randomised controlled trial (RCT) with a low, high or uncertain risk of bias across six  
39  
40 criteria including randomisation, allocation concealment, performance bias, ascertainment  
41  
42 bias, incomplete outcome data and selective reporting.(24) For non-randomised studies  
43  
44 we considered the risk of bias due to incomplete data and selective reporting.  
45  
46  
47  
48  
49  
50  
51  
52  
53

## 54 **Patient and Public Involvement**

55  
56  
57 Neither patients nor the public were involved in the design, conduct, reporting or  
58  
59 dissemination of this research.  
60

## RESULTS

### Study selection

A total of 10,112 records were returned, with 6,517 unique record titles and abstracts screened for possible inclusion. Of these, 56 full texts were obtained and reviewed, with 18 papers (from 17 studies) meeting the inclusion criteria (Figure 1). Primary reasons for exclusion were: the studies were conducted in children under the age of 18 (n=19), were not reporting results of a trial of an intervention (e.g. protocol papers) (n=14) and did not include physical activity as a key component of the intervention (n=5). The studies were predominately funded by Government and/or Research Grants (n=9), with funding sources not specified by six studies. One intervention which examined the impact of the Alexander technique (25, 26) was funded by private sources including The Australian Society of Teachers of the Alexander Technique and the FM Alexander Trust (UK), in addition to government and research funding. One intervention was not sponsored.

### Study characteristics

The characteristics of the studies are shown in Supplementary Material 4 and summarised in Table 1. Most of the papers (n=14, 78%) were published in the ten years preceding the date of the search (2008-2018). Nine employed a randomised control trial study design, with the remaining eight studies using a pre-post format. Seven interventions were conducted in the United States with the remaining studies conducted in Europe (n= 5), Asia (n=3), and Oceania (n= 2). Except for one study that was published in Farsi, all studies were published in English.

**Table 1. Summary of included interventions**

|                                  | Falls Prevention and Balance Interventions |                    |                   |               |                        |                |                 | Other Intervention Types |             |                                   |              |                                |                |               |                   |                | Mixed                        |
|----------------------------------|--------------------------------------------|--------------------|-------------------|---------------|------------------------|----------------|-----------------|--------------------------|-------------|-----------------------------------|--------------|--------------------------------|----------------|---------------|-------------------|----------------|------------------------------|
|                                  | Campbell (2005)                            | Cheung (2008)      | Kingston (2018)   | Kovács (2012) | Surakka (2008)         | Surakka (2011) | Waterman (2016) | Ackley-Holbrook (2016)   | Chen (2012) | Gleeson (2015, 2017)              | Jeter (2012) | Jeter (2015)                   | Larsson (2006) | Miszko (2004) | Ponchillia (1992) | Salari (2013)  | Hackney (2015)               |
| <b>Study Design</b>              | RCT                                        | RCT                | PP                | RCT           | PP                     | RCT            | RCT             | PP                       | RCT         | RCT                               | PP           | RCT                            | PP             | PP            | PP                | PP             | RCT                          |
| <b>Sample size</b>               | 391                                        | 50                 | 24                | 41            | 27                     | 29             | 49              | 21                       | 40          | 120                               | 10           | 21                             | 8              | 10            | 3                 | 30             | 32                           |
| <b>Mean age (yrs)</b>            | 84                                         | 83                 | 80                | 69            | 54                     | 56             | 81              | 48                       | 86          | 75                                | 46           | 55                             | 52             | 53            | 31                | 22             | 79                           |
| <b>Basis of PA Intervention</b>  | Otago                                      | Balance + Strength | Matter Of Balance | Otago         | Balance                | Balance        | Otago           | Walking                  | Tai Chi     | Alexander Technique               | Yoga         | Yoga                           | Dance          | Tai Chi       | Aerobics          | Core stability | Exp.= Dance Ctrl= FallProof  |
| <b>Delivery mode<sup>a</sup></b> | Self-directed                              | Group              | Group             | Group         | Group or mixed         | Group          | Self-directed   | Self-directed            | Group       | Group                             | Mixed        | Mixed                          | Group          | Mixed         | Group             | -              | Group                        |
| <b>Duration</b>                  | 1yr                                        | 12wks              | 4wks              | 6mths         | 5-6wks                 | 5-6wks         | 6mths           | 8wks                     | 16wks       | 12wks                             | 8wks         | 8wks                           | 8wks           | 8wks          | 7wks              | 8wks           | 10-12wks                     |
| <b>Compliance</b>                | 18%                                        | 100%               | -                 | 95%           | Mean # sessions = 13.5 | -              | Equivocal       | 94%                      | -           | 100%                              | -            | 82% sessions 90% home practice | -              | -             | -                 | -              | 25/32 completed all sessions |
| <b>Retention</b>                 | 92%                                        | 100%               | 100%              | 100%          | 89%                    | 100%           | 88%             | 81%                      | 62%         | 93%                               | 70%          | 81%                            | 88%            | 80%           | 100%              | -              | 78%                          |
| <b>Adverse Outcomes</b>          | N = 1 moderate injury                      | None               | -                 | N = 22 falls  | -                      | -              | None            | N = 2 falls              | -           | N = 2 deaths, N=1 hospitalisation | -            | None                           | -              | None          | -                 | -              | -                            |
| <b>Results<sup>b</sup></b>       |                                            |                    |                   |               |                        |                |                 |                          |             |                                   |              |                                |                |               |                   |                |                              |
| <b>Falls and Balance</b>         | Mixed                                      | +                  | NT                | 0             | DA                     | NT             | 0               | NT                       | +           | +(postural sway)                  | DA           | +                              | ~+             | DA            | NT                | +              | +                            |
| <b>Functional Capacity</b>       | NT                                         | +                  | DA                | +             | NT                     | +              | NT              | +                        | +           | 0                                 | NT           | +                              | ~+             | DA            | ~+                | NT             | +                            |
| <b>Psych. well-being</b>         | NT                                         | NT                 | NT                | NT            | DA                     | NT             | 0               | NT                       | NT          | 0                                 | DA           | NT                             | NT             | DA            | NT                | NT             | 0                            |

<sup>a</sup> Mixed = self-directed sessions in combination with regular group classes or face to face session; Group = group class-based only.

<sup>b</sup> + = statistically significant result in favor of intervention, 0 = no statistically significant change, ~+ = analysis at individual level showing significant change, DA = descriptive analysis only, NT = not tested.

'-' = Not reported

Abbreviations: PP - pre-post; RCT – randomised controlled trial

## Participants

There was a total of 906 participants across the 17 interventions, with a mean of 53 and a median of 29 per study. The number of participants per study ranged from three to 391 with 14 studies with 50 or fewer participants. The mean age across all studies was 62 years, with only two (27, 28) examining populations aged younger than 35 years.

Approximately two-thirds (70%) of participants were female, with three studies only including women.(27, 29, 30) Participants were recruited through a combination of local advocacy groups, community center listings, and by word-of-mouth in four studies. In eight studies participants were recruited from medical institutions such as hospitals, clinics, private practices and rehabilitation services. In two studies participants were recruited from residential care homes and one recruited participants from a university (recruitment method unknown in two studies).

Visual impairment was defined in several ways with varying levels of detail. Most studies provided cut-points of visual acuity (e.g. 6/24 or worse), while some linked these cut points to those designated by the World Health Organization International Classification of Diseases Codes.(31, 32) Visual conditions identified included age-related conditions such as macular degeneration and cataracts, diabetic retinopathy, glaucoma, corneal scars, and congenital blindness.

## Intervention types

Seven studies employed specific falls prevention and/or balance-based physical activity interventions. Of these, three used the Otago exercise program,(30, 33, 34) three used general physical activity training programs aiming to improve balance,(29, 35, 36) and one used the Matter of Balance program.(37, 38) The remaining interventions were based on

1  
2 other forms of physical activity including walking (n=1),(31) Tai Chi (n=2),(39, 40)  
3  
4 Alexander Technique (n=1),(25, 26) Yoga (n=2),(41, 42) dance (n=1),(43) aerobics (n=1)  
5  
6 (27) and core stability training (n=1).(28) One study utilised a falls prevention program  
7  
8 (FallProof) as a control, comparing to a dance-based intervention program.(32) The  
9  
10 interventions were predominately delivered in a group based, face-to-face format with only  
11  
12 three being chiefly self-directed with periodic contact from investigators.(31, 33, 34) The  
13  
14 interventions ran for an average of 13 weeks (range of four weeks – one year) with three-  
15  
16 quarters (n = 13/17, 76%) having a duration of 4 -12 weeks.  
17  
18  
19  
20  
21  
22  
23

## 24 Objectives

25  
26  
27 In general, each intervention aimed to assess the impact of a physical activity program on  
28  
29 falls risk or balance, physical health, and/or mental health. Four interventions aimed to  
30  
31 compare the physical activity intervention to another program such as a home safety  
32  
33 program,(33, 34) fall prevention program,(32) or osteoporosis program.(30) Eight  
34  
35 interventions aimed to cater specifically for “older” or “elderly” individuals. One study  
36  
37 focused on female athletes.(28) Two studies examined the cost-effectiveness of the  
38  
39 intervention.(33, 34)  
40  
41  
42  
43  
44  
45  
46  
47

## 48 Outcome measures

49  
50 As summarised in Table 2, the most common outcomes were measures of balance,  
51  
52 reported in 65% of the interventions (Berg Balance Scale [BBS], n = 4; other measures  
53  
54 e.g. sensory organisation test [SOT] and one legged stance [OLS], n = 9). Six studies  
55  
56 (35%) examined the impact of the intervention of an aspect of mental well-being such as  
57  
58 anxiety, depression, or quality of life. Measures of mobility were used in five studies (29%),  
59  
60



1  
2 most commonly the timed up and go (TUG) test (n=5). Other outcome measures included  
3  
4 number of falls (n=4), muscle strength (n=3), flexibility (n=3), gait (n=3), anthropometric  
5  
6 measures (n=3), the chair stand test (n=2) and sleep (n=1).  
7  
8  
9  
10  
11  
12  
13  
14  
15  
16  
17  
18  
19  
20  
21  
22  
23  
24  
25  
26  
27  
28  
29  
30  
31  
32  
33  
34  
35  
36  
37  
38  
39  
40  
41  
42  
43  
44  
45  
46  
47  
48  
49  
50  
51  
52  
53  
54  
55  
56  
57  
58  
59  
60

For peer review only

Table 2 Summary of outcome measures

|                     | OUTCOME                               | Ackley-Holbrook (2016) | Campbell (2005) | Chen (2012) | Cheung (2008) | Gleeson (2015, 2017) | Hackney (2015) | Jeter (2012) | Jeter (2015) | Kingston (2018) | Kovács (2012) | Larsson (2006) | Miszko (2004) | Ponchillia (1992) | Salari (2013) | Surakka (2008) | Surakka (2011) | Waterman (2016) |
|---------------------|---------------------------------------|------------------------|-----------------|-------------|---------------|----------------------|----------------|--------------|--------------|-----------------|---------------|----------------|---------------|-------------------|---------------|----------------|----------------|-----------------|
| Balance             | Number of Falls                       |                        | X               |             |               | X                    |                |              |              |                 | X             |                |               |                   |               |                |                | X               |
|                     | Berg Balance Scale                    |                        |                 |             | X             |                      | X              |              |              |                 | X             |                | X             |                   |               |                |                |                 |
|                     | Other Balance <sup>a</sup>            |                        |                 | X           |               | X                    | X              | X            | X            |                 |               | X              | X             |                   | X             | X              |                |                 |
| Functional Capacity | Timed Up and Go                       |                        |                 |             | X             |                      | X              |              |              | X               | X             | X              |               |                   |               |                |                |                 |
|                     | Other Mobility <sup>b</sup>           |                        |                 |             |               |                      |                |              |              | X               | X             |                |               |                   |               |                |                |                 |
|                     | Chair Stand Test                      |                        |                 |             | X             | X                    |                |              |              |                 |               |                |               |                   |               |                |                |                 |
|                     | Other Fitness <sup>c</sup>            | X                      |                 |             |               | X                    | X              |              |              |                 |               | X              |               | X                 |               |                |                |                 |
|                     | Muscle strength                       |                        |                 | X           |               |                      |                |              |              |                 |               |                | X             | X                 |               |                |                |                 |
|                     | Flexibility                           |                        |                 |             |               |                      |                |              | X            |                 |               |                |               | X                 |               |                | X              |                 |
| Other               | Psychological well-being <sup>d</sup> |                        |                 |             |               | X                    | X              | X            |              |                 |               |                | X             |                   |               | X              |                | X               |

<sup>a</sup> Including measures of postural sway and stability (Sensory Organisation Test, One Legged Stance, Mean Stride Length, Functional Reach).

<sup>b</sup> Including Performance-oriented mobility assessment and Activity Index

<sup>c</sup> Including six-minute walk test, step count, gait measures.

<sup>d</sup> Including measures of quality of life, anxiety, depression, emotional wellbeing.

## Synthesis of Results

Falls or balance related outcomes were measured in 13 studies, with statistically significant results in favor of the intervention observed in seven studies (54%). Although more falls were recorded in the intervention group in the Campbell et al. (2005) study, further analysis showed fewer falls with increasing adherence to the exercise program ( $p=0.001$ ). Measures of functional capacity were used in 12 studies, with statistically significant results in favor of the intervention observed in nine studies (75%). Psychological well-being was measured in only six studies and no significant results were observed in these outcomes. No paper reported negative results that would suggest the intervention was detrimental to any aspect of health measured. Drop out reasons across all studies included medical problems ( $n=10$ ), lack of transport or travel time ( $n=7$ ), dissatisfaction with program ( $n=1$ ), time ( $n=2$ ), other ( $n=3$ ).

## Effectiveness of Interventions on PA outcomes

A meta-analysis was conducted where outcome measures were common across RCT interventions, namely for the Timed Up and Go (TUG), Chair Sit Test (CST) and Berg Balance Scale (BBS). Only four studies were able to be included in the meta-analysis and the results are shown in Figure 2. In all instances, the combined results crossed the line of null effect (mean difference = 0) indicating non-significant effects of the interventions on each of the outcome measures. In addition, the wide 95% confidence intervals indicate imprecision across the studies, potentially due to small sample sizes. Heterogeneity was low for the TUG and CST ( $I^2 = 0\%$  and  $22\%$ , respectively) suggesting consistent null findings, however, it was high for the BBS ( $I^2 = 53\%$ ).

## Study Quality – Risk of Bias Assessment

The results of the Risk of Bias assessment can be found in Table 3. In general, the randomised controlled trials showed a low risk of bias in randomisation (n=6/9 'low') and allocation concealment (n=6/9 'low'). Risk of attrition bias due to incomplete data was also low in the majority of all studies (n=11/17). Of note, all but one study was categorised as 'unclear' or 'high' risk of reporting bias due to selective outcome reporting. In all pre-post studies it was not possible to determine if all outcomes were reported due to the lack of study protocol or registrations. Of the nine randomised controlled trials, study protocols were unavailable for five, two were missing a priori secondary outcomes, one followed the study protocol, and one deviated from the study protocol.

**Table 3. Risk of bias assessment for randomised control trials (RCTs) and pre-post studies**

| Source                                   | Risk of bias (High, low, unclear) |             |                  |                    |                         |                     |
|------------------------------------------|-----------------------------------|-------------|------------------|--------------------|-------------------------|---------------------|
|                                          | Randomisation sequence allocation | Concealment | Performance bias | Ascertainment bias | Incomplete outcome data | Selective reporting |
| <b>RCTs</b>                              |                                   |             |                  |                    |                         |                     |
| Campbell et al (2005)                    | LOW                               | LOW         | UNCLEAR          | UNCLEAR            | LOW                     | UNCLEAR             |
| Chen et al (2012)                        | UNCLEAR                           | UNCLEAR     | LOW              | LOW                | LOW                     | UNCLEAR             |
| Cheung et al., (2008)                    | LOW                               | LOW         | LOW              | LOW                | LOW                     | UNCLEAR             |
| Gleeson et al. (2015, 2017)              | LOW                               | LOW         | UNCLEAR          | LOW                | LOW                     | UNCLEAR             |
| Hackney et al. (2015)                    | HIGH                              | HIGH        | HIGH             | UNCLEAR            | LOW                     | UNCLEAR             |
| Jeter et al (2015)                       | LOW                               | LOW         | HIGH             | LOW                | LOW                     | HIGH                |
| Kovacs et al (2012)                      | LOW                               | LOW         | UNCLEAR          | LOW                | LOW                     | UNCLEAR             |
| Surakka et al (2011)                     | UNCLEAR                           | UNCLEAR     | HIGH             | HIGH               | UNCLEAR                 | UNCLEAR             |
| Waterman et al (2016)                    | LOW                               | LOW         | HIGH             | LOW                | LOW                     | LOW                 |
| <b>Pre-post with no comparison group</b> |                                   |             |                  |                    |                         |                     |
| Ackley-Holbrook et al (2016)             | ---                               | ---         | ---              | ---                | LOW                     | UNCLEAR             |
| Jeter (2012)                             | ---                               | ---         | ---              | ---                | HIGH                    | UNCLEAR             |
| Kingston (2018)                          | ---                               | ---         | ---              | ---                | UNCLEAR                 | UNCLEAR             |
| Larsson (2006)                           | ---                               | ---         | ---              | ---                | LOW                     | UNCLEAR             |
| Miszko (2004)                            | ---                               | ---         | ---              | ---                | UNCLEAR                 | UNCLEAR             |
| Ponchillia (1992)                        | ---                               | ---         | ---              | ---                | LOW                     | UNCLEAR             |
| Salari (2013)                            | ---                               | ---         | ---              | ---                | UNCLEAR                 | UNCLEAR             |
| Surakka (2008)                           | ---                               | ---         | ---              | ---                | UNCLEAR                 | UNCLEAR             |

--- Not applicable

## DISCUSSION

This systematic review sought to summarise the effects of physical activity interventions in adults who are visually impaired. Based on the studies identified, there is evidence that physical activity interventions are beneficial to adults with visual impairment, with positive health benefits observed particularly in outcomes related to functional capacity. However, when focusing on RCTs, where the risk of bias is lower, and examining combined results in a meta-analysis, the evidence for intervention effectiveness is less clear.

This review identified seventeen intervention studies, which represents a considerably small evidence base, particularly in contrast to the size of the problems related to physical inactivity, health conditions and challenges faced by many people with visual impairment. Several characteristics of existing studies have also limited the internal and external validity. First, most studies included very small sample sizes with four presenting descriptive analysis only (did not report inferential statistics) and two reporting results at an individual, rather than group level. Second, there was a substantial imbalance in both gender (70% female participants) and age with all but two studies focused on individuals aged older than 45 years. However, overrepresentation of female participants is common in health interventions and people aged 50 years and older represent 65% of all visually impaired persons worldwide (and 82% of blind persons).(44) Third, more than three-quarters of the studies ran for 12 weeks or less, limiting the ability to assess maintenance of changes observed and effects on outcomes that may take time to change. For example, of the six studies assessing psychological well-being and mental health outcomes, none reported statistically significant improvements. However, promising results were observed in measures of functional capacity, such as mobility and fitness, and balance, even in a relatively short time period of 5-6 weeks.(36) To address these issues future interventions should, where possible, employ an

1  
2 RCT study design with a priori calculation of participants needed to ensure the study is  
3  
4 powered for more robust statistical analysis. If feasible, a longer duration would also be of  
5  
6 benefit, particularly in establishing the impact of the interventions on mental health outcomes.  
7  
8 Also, a targeted approach to include males and those aged 18-45 years may be appropriate  
9  
10 to address the underrepresentation of these demographics in the current literature.  
11  
12

13  
14 A wide range of physical activities were used by the intervention studies, most of which  
15  
16 focused on low-intensity physical activities, such as yoga and Tai Chi, with a strong emphasis  
17  
18 on improving balance and stability. Only one study incorporated higher intensity activity in the  
19  
20 form of aerobics with “many high-impact (bouncing and jumping) ... movements”.(27)  
21  
22 However, this study was also the smallest with only three participants, so it is hard to  
23  
24 determine its effects. Although the benefits of yoga, Tai Chi and other low-intensity activities  
25  
26 have been documented,(45-47) moderate and vigorous physical activity have further health  
27  
28 benefits and are generally the primary focus of global physical activity guidelines.(5) The  
29  
30 current CDC guidelines recommend a minimum of 150 minutes per week of moderate activity  
31  
32 per week (or 75 minutes of vigorous activity) (5) with the evidence on light intensity physical  
33  
34 activity not yet conclusive for informing guidelines.(1) Although these guidelines highlight a  
35  
36 dose-response relationship whereby more health benefits are gained with an increase in  
37  
38 moderate intensity physical activity undertaken, even small increases in physiological  
39  
40 capacity / physical activity provide significant reduction in mortality risk.(48, 49) This suggests  
41  
42 that future physical activity interventions among those with visual impairment should consider  
43  
44 incorporating some physical activity at a moderate intensity or higher, even if only in small  
45  
46 doses in older individuals. Although on the surface visual impairment may appear to be a  
47  
48 barrier to undertaking moderate or vigorous physical activity, the existence of numerous  
49  
50 sports for visually impaired athletes at Paralympic level would suggest otherwise.(50) Even  
51  
52  
53  
54  
55  
56  
57  
58  
59  
60

1  
2 though few individuals reach this height of athletic ability, it is evident that visually impaired  
3  
4 individuals can perform higher intensity activities, evidenced by the feasibility of physical  
5  
6 activity trials with walking and aerobics as the intervention.(27, 31) Therefore, development of  
7  
8 interventions for moderate and / or vigorous physical activity could form a focus in future  
9  
10 work. Moreover, given the increased risk of poorer physical and mental health for those who  
11  
12 are visually impaired,(13, 51) it is important to ensure they are given opportunities to  
13  
14 undertake physical activity at higher intensities in order to garner the further health benefits.  
15  
16

17  
18 In terms of delivery mode, studies were predominately group-based, with nine of sixteen  
19  
20 (delivery mode unknown in one study) purely delivered in a face-to-face manner, and a further  
21  
22 four involving group classes with additional self-directed practice at home. The remaining  
23  
24 three studies were of a more self-directed nature with varying levels of investigator  
25  
26 involvement including five home visits throughout the year-long study,(33) five home visits  
27  
28 (from occupational therapist or peer mentor) and two phone calls over the six month  
29  
30 duration,(34) and a single orientation session followed by self-directed activity.(31) Further  
31  
32 intervention studies could compare the effectiveness of group-based and self-directed trials to  
33  
34 determine the possibility of reducing investigator burden in delivery by increasing self-directed  
35  
36 options where possible. This would have the added benefit of incorporating capacity building  
37  
38 into the intervention and enabling participants to continue in their new habits post-  
39  
40 intervention. Alternatively, the use of already existing programs such as regular community  
41  
42 dance classes could be examined as a means of increasing the likelihood of maintaining  
43  
44 changes to physical activity behaviors following the intervention. To our knowledge, none of  
45  
46 the group-based interventions identified allowed participants to continue in the physical  
47  
48 activity following the study as they were all conducted for research purposes only. However,  
49  
50  
51  
52  
53  
54  
55  
56  
57  
58  
59  
60



1  
2 given the habitual nature physical activity, it is possible highly motivated individuals may have  
3  
4 continued to practice in their own homes following instruction during the intervention.  
5  
6  
7  
8  
9

## 10 Strengths and limitations

11  
12  
13 The strengths of this systematic review include incorporating both qualitative and quantitative  
14 evidence synthesis, following AMSTAR2 and PRISMA guidelines, and not restricting literature  
15 search by publication language and dates. Limitations relate to the studies identified, rather  
16 than the review process itself. The studies identified were generally small with diverse study  
17 designs and outcomes measured. This made it challenging to determine the effectiveness of  
18 the interventions and to identify the aspects that should be retained in subsequent studies.  
19  
20 Most studies lasted for a short period of time without intended examination for longer-term  
21 maintenance. Finally, the quality assessment showed a high risk of bias across the papers in  
22 several categories.  
23  
24  
25  
26  
27  
28  
29  
30  
31  
32  
33  
34  
35  
36  
37

## 38 CONCLUSION

39  
40  
41 Given the higher risk of developing non-communicable diseases for those with visual  
42 impairment, it is imperative that sufficient physical activity is undertaken by these individuals  
43 to ensure that they benefit from the positive health outcomes. This systematic review  
44 illustrates that physical activity interventions in individuals with visual impairment can have  
45 positive results, particularly in physical measures such as mobility and balance. However,  
46 when performing a meta-analysis of RCTs, the evidence for effectiveness is less clear. More  
47 high quality research needs to be conducted in larger groups, with a broader age focus and  
48  
49  
50  
51  
52  
53  
54  
55  
56  
57  
58  
59  
60

1  
2 over longer periods of time to enable the optimisation of further interventions. Additionally,  
3  
4 future studies need to incorporate interventions that equip the participants with skills and  
5  
6 confidence to sustain their new physical activity behaviors post-intervention. Finally, more  
7  
8 research is required into the feasibility of interventions that address the need for moderate  
9  
10 and vigorous physical activity, which unlock even more health benefits compared to the low  
11  
12 intensity activities reported in this systematic review.  
13  
14  
15  
16  
17  
18  
19  
20  
21  
22  
23  
24  
25  
26  
27  
28  
29  
30  
31  
32  
33  
34  
35  
36  
37  
38  
39  
40  
41  
42  
43  
44  
45  
46  
47  
48  
49  
50  
51  
52  
53  
54  
55  
56  
57  
58  
59  
60

For peer review only

## **AUTHOR CONTRIBUTIONS**

JS, DM, MA, DD were involved in study design. All authors made substantial contributions to the acquisition, analysis and/or interpretation of the data and to drafting and revising the work.

## **ACKNOWLEDGEMENTS**

The authors wish to thank Dr Javad Koohsari, from Waseda University, Japan, for helping with translation and data extraction from a study published in Farsi.

## **FUNDING**

The work was supported by a Sydney Research Accelerator (SOAR) prize awarded to Ding. Ding is funded by a National Heart Foundation Future Leader Fellowship.

## **COMPETING INTERESTS**

None declared.

## **DATA AVAILABILITY STATEMENT**

All data relevant to the study are included in the article or uploaded as supplementary information.

## REFERENCES

1. 2018 Physical Activity Guidelines Advisory Committee. 2018 Physical Activity Guidelines Advisory Committee Scientific Report Washington, DC2018 [Available from: [https://health.gov/paguidelines/second-edition/report/pdf/pag\\_advisory\\_committee\\_report.pdf](https://health.gov/paguidelines/second-edition/report/pdf/pag_advisory_committee_report.pdf), Accessed: April 2019].
2. Lee IM, Shiroma EJ, Lobelo F, et al. Effect of physical inactivity on major non-communicable diseases worldwide: an analysis of burden of disease and life expectancy. *Lancet*. 2012;380(9838):219-29.
3. Chekroud SR, Gueorguieva R, Zheutlin AB, et al. Association between physical exercise and mental health in 1.2 million individuals in the USA between 2011 and 2015: a cross-sectional study. *Lancet Psychiatry*. 2018;5(9):739-46.
4. Penedo FJ, Dahn JR. Exercise and well-being: a review of mental and physical health benefits associated with physical activity. *Current opinion in psychiatry*. 2005;18(2):189-93.
5. U.S. Department of Health and Human Services. Physical Activity Guidelines for Americans, 2nd Edition. Washington, DC: U. S. Department of Health and Human Services; 2018 [Available from: [https://health.gov/paguidelines/second-edition/pdf/Physical\\_Activity\\_Guidelines\\_2nd\\_edition.pdf](https://health.gov/paguidelines/second-edition/pdf/Physical_Activity_Guidelines_2nd_edition.pdf), Accessed: April 2019].
6. Guthold R, Stevens GA, Riley LM, et al. Worldwide trends in insufficient physical activity from 2001 to 2016: a pooled analysis of 358 population-based surveys with 1.9 million participants. *The Lancet Global health*. 2018;6(10):e1077-e86.
7. U.S. Department of Health and Human Services. Increasing Physical Activity Among Adults with Disabilities 2018 [Available from: <https://www.cdc.gov/ncbddd/disabilityandhealth/pa.html>, Accessed: April 2019].
8. Okoro CA, Hollis ND, Cyrus AC, et al. Prevalence of Disabilities and Health Care Access by Disability Status and Type Among Adults - United States, 2016. *MMWR Morb Mortal Wkly Rep*. 2018;67(32):882-7.
9. World Health Organization. Blindness and Visual Impairment 2018 [Available from: <https://www.who.int/news-room/fact-sheets/detail/blindness-and-visual-impairment>, Accessed: March 2019].
10. Langelaan M, de Boer MR, van Nispen RM, et al. Impact of visual impairment on quality of life: a comparison with quality of life in the general population and with other chronic conditions. *Ophthalmic Epidemiol*. 2007;14(3):119-26.
11. Vu HT, Keeffe JE, McCarty CA, et al. Impact of unilateral and bilateral vision loss on quality of life. *The British journal of ophthalmology*. 2005;89(3):360-3.
12. Zhang X, Bullard KM, Cotch MF, et al. Association between depression and functional vision loss in persons 20 years of age or older in the United States, NHANES 2005-2008. *JAMA ophthalmology*. 2013;131(5):573-81.
13. McCarty CA, Nanjan MB, Taylor HR. Vision impairment predicts 5 year mortality. *The British journal of ophthalmology*. 2001;85(3):322-6.
14. Taylor HR, Katala S, Munoz B, et al. Increase in mortality associated with blindness in rural Africa. *Bulletin of the World Health Organization*. 1991;69(3):335-8.
15. Ramrattan RS, Wolfs RC, Panda-Jonas S, et al. Prevalence and causes of visual field loss in the elderly and associations with impairment in daily functioning: the Rotterdam Study. *Arch Ophthalmol*. 2001;119(12):1788-94.
16. Nguyen AM, Arora KS, Swenor BK, et al. Physical activity restriction in age-related eye disease: a cross-sectional study exploring fear of falling as a potential mediator. *BMC geriatrics*. 2015;15:64.
17. van Landingham SW, Willis JR, Vitale S, et al. Visual field loss and accelerometer-measured physical activity in the United States. *Ophthalmology*. 2012;119(12):2486-92.
18. Willis JR, Jefferys JL, Vitale S, et al. Visual impairment, uncorrected refractive error, and accelerometer-defined physical activity in the United States. *Arch Ophthalmol*. 2012;130(3):329-35.
19. Kirchner CE, Gerber EG, Smith BC. Designed to deter. Community barriers to physical activity for people with visual or motor impairments. *Am J Prev Med*. 2008;34(4):349-52.

20. Krahn GL, Walker DK, Correa-De-Araujo R. Persons with disabilities as an unrecognized health disparity population. *Am J Public Health*. 2015;105 Suppl 2:S198-206.
21. Furtado OL, Allums-Featherston K, Lieberman LJ, et al. Physical activity interventions for children and youth with visual impairments. *Adapt Phys Activ Q*. 2015;32(2):156-76.
22. Moher D, Liberati A, Tetzlaff J, et al. Preferred reporting items for systematic reviews and meta-analyses: the PRISMA statement. 2009.
23. Shea BJ, Reeves BC, Wells G, et al. AMSTAR 2: a critical appraisal tool for systematic reviews that include randomised or non-randomised studies of healthcare interventions, or both. *BMJ*. 2017;358:j4008.
24. Higgins JPT, Green S, editors. *Cochrane Handbook for Systematic Reviews of Interventions*. : The Cochrane Collaboration. Available from [www.handbook.cochrane.org](http://www.handbook.cochrane.org). Accessed: May 2019
25. Gleeson M, Sherrington C, Lo S, et al. Impact of the Alexander technique on well-being: a randomised controlled trial involving older adults with visual impairment. *Clin Exp Optom*. 2017;100(6):633-41.
26. Gleeson M, Sherrington C, Lo S, et al. Can the Alexander Technique improve balance and mobility in older adults with visual impairments? A randomized controlled trial. *Clin Rehabil*. 2015;29(3):244-60.
27. Ponchillia SV, Powell LL, Felski KA, et al. The Effectiveness of Aerobic Exercise Instruction for Totally Blind Women. *J Visual Impair Blin*. 1992;86(4):174-7.
28. Salari A, Sahebalzamani, M., Daneshmandi, H. The Effects of Core Stability Training Program on Balance in Blind Female Athletes. *Journal of Kerman University of Medical Sciences*. 2013;20(6):585-95.
29. Cheung KKW, Au KY, Lam WWS, et al. Effects of a structured exercise programme on functional balance in visually impaired elderly living in a residential setting. *Hong Kong Physiother J*. 2008;26:45-50.
30. Kovacs E, Toth K, Denes L, et al. Effects of exercise programs on balance in older women with age-related visual problems: A pilot study. *Arch Gerontol Geriatr*. 2012;55(2):446-52.
31. Ackley-Holbrook E, Kang M, Morgan DW. Development and Evaluation of the Walk for Health Program: A Physical Activity Intervention for Adults with Visual Impairments. *J Visual Impair Blin*. 2016;110(2):103-14.
32. Hackney ME, Hall CD, Echt KV, et al. Multimodal Exercise Benefits Mobility in Older Adults With Visual Impairment: A Preliminary Study. *J Aging Phys Act*. 2015;23(4):630-9.
33. Campbell AJ, Robertson MC, La Grow SJ, et al. Randomised controlled trial of prevention of falls in people aged > or =75 with severe visual impairment: the VIP trial. *BMJ*. 2005;331(7520):817.
34. Waterman H, Ballinger C, Brundle C, et al. A feasibility study to prevent falls in older people who are sight impaired: the VIP2UK randomised controlled trial. *Trials*. 2016;17(1):464.
35. Surakka A, Kivela T. Motivating visually impaired and deaf-blind people to perform regular physical exercises. *The British Journal of Visual Impairment*. 2008;26(3):255-68.
36. Surakka A, Kivela T. The Effect of a Physical Training Programme on Flexibility of Upper Body and Trunk in Visually Impaired and Deaf-Blind Persons. *European Journal of Adapted Physical Activity*. 2011;4(1):7-21.
37. Kingston JT. Visual Impairment and Falls: Outcomes of Two Fall Risk Assessments after a Four-Week Fall Prevention Program. *J Visual Impair Blin*. 2018;112(4):411-5.
38. Tennstedt S, Howland J, Lachman M, et al. A randomized, controlled trial of a group intervention to reduce fear of falling and associated activity restriction in older adults. *J Gerontol B Psychol Sci Soc Sci*. 1998;53(6):P384-92.
39. Chen EW, Fu AS, Chan KM, et al. The effects of Tai Chi on the balance control of elderly persons with visual impairment: a randomised clinical trial. *Age Ageing*. 2012;41(2):254-9.
40. Miszko TA, Ramsey VK, Blasch BB. Tai Chi for people with visual impairments: a pilot study. *J Visual Impair Blin*. 2004;98(1).
41. Jeter PE, Dagnelie, G., Khalsa, S.B.R., Haaz, S., Bittner, A.K. Yoga for Persons with Severe Visual Impairment: a Feasibility Study. *Alternative Medicine Studies*. 2012;2:e5.
42. Jeter PE, Haaz Moonaz S, Bittner AK, et al. Ashtanga-Based Yoga Therapy Increases the Sensory Contribution to Postural Stability in Visually-Impaired Persons at Risk for Falls as Measured by the Wii Balance Board: A Pilot Randomized Controlled Trial. *PLoS One*. 2015;10(6):e0129646.
43. Larsson L, Frandin K. Body Awareness and Dance-Based Training for Persons with Acquired Blindness-Effects on Balance and Gait Speed. *Visual Impairment Research*. 2006;8:25-40.

- 1  
2 44. Pascolini D, Mariotti SP. Global estimates of visual impairment: 2010. *The British journal of*  
3 *ophthalmology*. 2012;96(5):614-8.
- 4 45. Chu P, Gotink RA, Yeh GY, et al. The effectiveness of yoga in modifying risk factors for cardiovascular  
5 disease and metabolic syndrome: A systematic review and meta-analysis of randomized controlled trials. *Eur J*  
6 *Prev Cardiol*. 2016;23(3):291-307.
- 7 46. Ross A, Thomas S. The health benefits of yoga and exercise: a review of comparison studies. *J Altern*  
8 *Complement Med*. 2010;16(1):3-12.
- 9 47. Jahnke R, Larkey L, Rogers C, et al. A comprehensive review of health benefits of qigong and tai chi. *Am*  
10 *J Health Promot*. 2010;24(6):e1-e25.
- 11 48. Arem H, Moore SC, Patel A, et al. Leisure time physical activity and mortality: a detailed pooled analysis  
12 of the dose-response relationship. *JAMA Intern Med*. 2015;175(6):959-67.
- 13 49. Mandsager K, Harb S, Cremer P, et al. Association of Cardiorespiratory Fitness With Long-term  
14 Mortality Among Adults Undergoing Exercise Treadmill Testing. *JAMA Netw Open*. 2018;1(6):e183605.
- 15 50. Paralympics Australia. Vision Classification 2019 [Available from:  
16 <https://www.paralympic.org.au/vision-classification/>, Accessed: April 2019].
- 17 51. Court H, McLean G, Guthrie B, et al. Visual impairment is associated with physical and mental  
18 comorbidities in older adults: a cross-sectional study. *Bmc Med*. 2014;12.
- 19  
20  
21  
22  
23  
24  
25  
26  
27  
28  
29  
30  
31  
32  
33  
34  
35  
36  
37  
38  
39  
40  
41  
42  
43  
44  
45  
46  
47  
48  
49  
50  
51  
52  
53  
54  
55  
56  
57  
58  
59  
60

1  
2 **FIGURE LEGENDS**  
3

4  
5 Figure 1 PRISMA FlowChart  
6  
7

8  
9  
10  
11 Figure 2 Forest Plots from Meta Analyses. A) Timed Up and Go. B) Chair Stand Test. C) Berg  
12  
13 Balance Scale. Abbreviations; CI = confidence interval, MD = mean difference, RE = Random  
14  
15 Effects  
16  
17  
18  
19  
20  
21  
22  
23  
24  
25  
26  
27  
28  
29  
30  
31  
32  
33  
34  
35  
36  
37  
38  
39  
40  
41  
42  
43  
44  
45  
46  
47  
48  
49  
50  
51  
52  
53  
54  
55  
56  
57  
58  
59  
60

For peer review only

1  
2  
3  
4  
5  
6  
7  
8  
9  
10  
11  
12  
13  
14  
15  
16  
17  
18  
19  
20  
21  
22  
23  
24  
25  
26  
27  
28  
29  
30  
31  
32  
33  
34  
35  
36  
37  
38  
39  
40  
41  
42  
43  
44  
45  
46  
47  
48  
49  
50  
51  
52  
53  
54  
55  
56  
57  
58  
59  
60

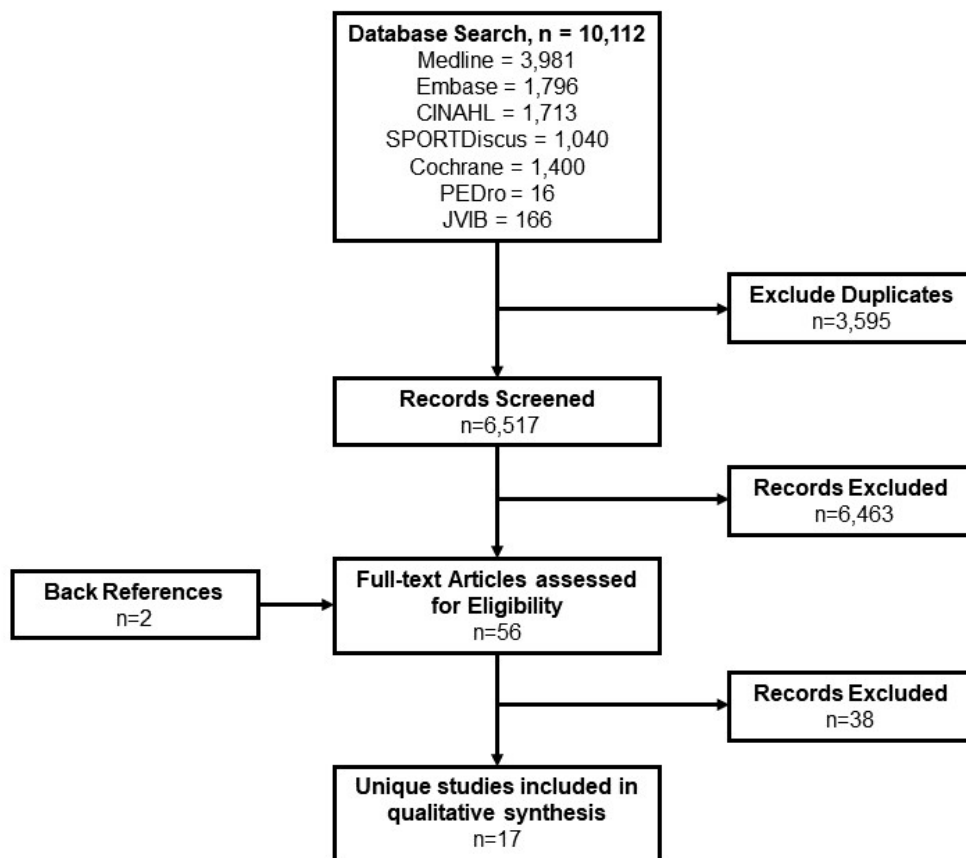

PRISMA FlowChart

190x219mm (96 x 96 DPI)



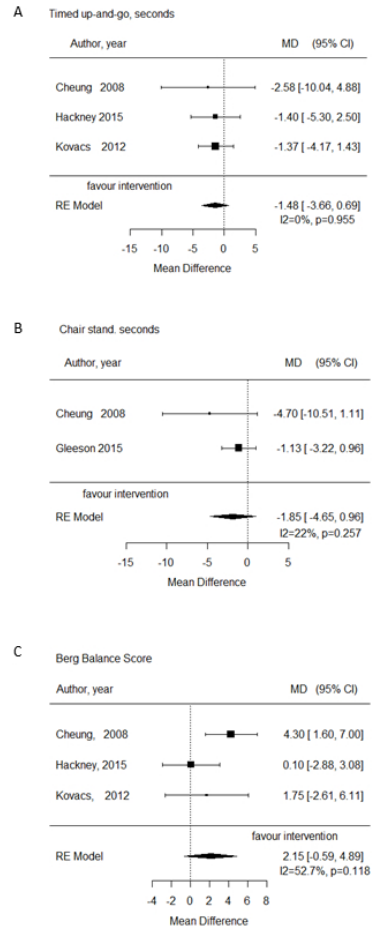

A. Timed Up and Go. B . Chair Stand Test. C. Berg Balance Scale

Forest Plots from Meta Analyses. A) Timed Up and Go. B) Chair Stand Test. C) Berg Balance Scale. Abbreviations; CI = confidence interval, MD = mean difference, RE = Random Effects

## Supplementary Material 1. Search strategy for Medline

| Vision Related Terms                                                                        | Physical Activity Terms      |
|---------------------------------------------------------------------------------------------|------------------------------|
| <b>MeSH TERMS</b>                                                                           |                              |
| Vision Disorders                                                                            | Exercise                     |
| Visually Impaired Persons                                                                   | Exercise therapy             |
| Glaucoma                                                                                    | Sports                       |
| Retinal Diseases                                                                            | Tai ji                       |
| Cataract                                                                                    | Yoga                         |
|                                                                                             | Dancing                      |
|                                                                                             | Postural Balance             |
|                                                                                             | Posture                      |
|                                                                                             | Muscle Strength              |
|                                                                                             | Gait                         |
|                                                                                             | Mobility Limitation          |
|                                                                                             | Exercise movement techniques |
|                                                                                             | Walking                      |
|                                                                                             | Rehabilitation               |
|                                                                                             | Dance therapy                |
|                                                                                             | Occupational therapy         |
|                                                                                             | Recreation therapy           |
| <b>KEYWORD SEARCH TERMS</b>                                                                 |                              |
| Vision*or visual*or eye*or sight adj3 (impair* or loss or disorder* or disease* or disabl*) | Exercise                     |
| Blindness                                                                                   | Physical* adj3 activ*        |
|                                                                                             | Danc*                        |

Vision related terms combined with "OR".

Physical activity terms combined with "OR".

Vision related and physical activity terms combined with "AND".

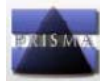

# PRISMA 2009 Checklist

| Section/topic                      | #  | Checklist item                                                                                                                                                                                                                                                                                              | Reported on page # |
|------------------------------------|----|-------------------------------------------------------------------------------------------------------------------------------------------------------------------------------------------------------------------------------------------------------------------------------------------------------------|--------------------|
| <b>TITLE</b>                       |    |                                                                                                                                                                                                                                                                                                             |                    |
| Title                              | 1  | Identify the report as a systematic review, meta-analysis, or both.                                                                                                                                                                                                                                         | 1                  |
| <b>ABSTRACT</b>                    |    |                                                                                                                                                                                                                                                                                                             |                    |
| Structured summary                 | 2  | Provide a structured summary including, as applicable: background; objectives; data sources; study eligibility criteria, participants, and interventions; study appraisal and synthesis methods; results; limitations; conclusions and implications of key findings; systematic review registration number. | 2                  |
| <b>INTRODUCTION</b>                |    |                                                                                                                                                                                                                                                                                                             |                    |
| Rationale                          | 3  | Describe the rationale for the review in the context of what is already known.                                                                                                                                                                                                                              | 4-6                |
| Objectives                         | 4  | Provide an explicit statement of questions being addressed with reference to participants, interventions, comparisons, outcomes, and study design (PICOS).                                                                                                                                                  | 5-6                |
| <b>METHODS</b>                     |    |                                                                                                                                                                                                                                                                                                             |                    |
| Protocol and registration          | 5  | Indicate if a review protocol exists, if and where it can be accessed (e.g., Web address), and, if available, provide registration information including registration number.                                                                                                                               | 7                  |
| Eligibility criteria               | 6  | Specify study characteristics (e.g., PICOS, length of follow-up) and report characteristics (e.g., years considered, language, publication status) used as criteria for eligibility, giving rationale.                                                                                                      | 7                  |
| Information sources                | 7  | Describe all information sources (e.g., databases with dates of coverage, contact with study authors to identify additional studies) in the search and date last searched.                                                                                                                                  | 8                  |
| Search                             | 8  | Present full electronic search strategy for at least one database, including any limits used, such that it could be repeated.                                                                                                                                                                               | Supp 1             |
| Study selection                    | 9  | State the process for selecting studies (i.e., screening, eligibility, included in systematic review, and, if applicable, included in the meta-analysis).                                                                                                                                                   | 6-7                |
| Data collection process            | 10 | Describe method of data extraction from reports (e.g., piloted forms, independently, in duplicate) and any processes for obtaining and confirming data from investigators.                                                                                                                                  | 8-9                |
| Data items                         | 11 | List and define all variables for which data were sought (e.g., PICOS, funding sources) and any assumptions and simplifications made.                                                                                                                                                                       | 8-9                |
| Risk of bias in individual studies | 12 | Describe methods used for assessing risk of bias of individual studies (including specification of whether this was done at the study or outcome level), and how this information is to be used in any data synthesis.                                                                                      | 9                  |
| Summary measures                   | 13 | State the principal summary measures (e.g., risk ratio, difference in means).                                                                                                                                                                                                                               | 9                  |
| Synthesis of results               | 14 | Describe the methods of handling data and combining results of studies, if done, including measures of consistency (e.g., $I^2$ ) for each meta-analysis.                                                                                                                                                   | 9                  |

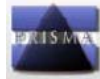

# PRISMA 2009 Checklist

| Section/topic                 | #  | Checklist item                                                                                                                                                                                           | Reported on page # |
|-------------------------------|----|----------------------------------------------------------------------------------------------------------------------------------------------------------------------------------------------------------|--------------------|
| Risk of bias across studies   | 15 | Specify any assessment of risk of bias that may affect the cumulative evidence (e.g., publication bias, selective reporting within studies).                                                             | 9                  |
| Additional analyses           | 16 | Describe methods of additional analyses (e.g., sensitivity or subgroup analyses, meta-regression), if done, indicating which were pre-specified.                                                         | NA                 |
| <b>RESULTS</b>                |    |                                                                                                                                                                                                          |                    |
| Study selection               | 17 | Give numbers of studies screened, assessed for eligibility, and included in the review, with reasons for exclusions at each stage, ideally with a flow diagram.                                          | 10, Fig 1          |
| Study characteristics         | 18 | For each study, present characteristics for which data were extracted (e.g., study size, PICOS, follow-up period) and provide the citations.                                                             | 10-15              |
| Risk of bias within studies   | 19 | Present data on risk of bias of each study and, if available, any outcome level assessment (see item 12).                                                                                                | 17-18              |
| Results of individual studies | 20 | For all outcomes considered (benefits or harms), present, for each study: (a) simple summary data for each intervention group (b) effect estimates and confidence intervals, ideally with a forest plot. | Fig 2              |
| Synthesis of results          | 21 | Present results of each meta-analysis done, including confidence intervals and measures of consistency.                                                                                                  | Fig 2              |
| Risk of bias across studies   | 22 | Present results of any assessment of risk of bias across studies (see Item 15).                                                                                                                          | 18                 |
| Additional analysis           | 23 | Give results of additional analyses, if done (e.g., sensitivity or subgroup analyses, meta-regression [see Item 16]).                                                                                    | NA                 |
| <b>DISCUSSION</b>             |    |                                                                                                                                                                                                          |                    |
| Summary of evidence           | 24 | Summarize the main findings including the strength of evidence for each main outcome; consider their relevance to key groups (e.g., healthcare providers, users, and policy makers).                     | 19-22              |
| Limitations                   | 25 | Discuss limitations at study and outcome level (e.g., risk of bias), and at review-level (e.g., incomplete retrieval of identified research, reporting bias).                                            | 21-22              |
| Conclusions                   | 26 | Provide a general interpretation of the results in the context of other evidence, and implications for future research.                                                                                  | 22                 |
| <b>FUNDING</b>                |    |                                                                                                                                                                                                          |                    |
| Funding                       | 27 | Describe sources of funding for the systematic review and other support (e.g., supply of data); role of funders for the systematic review.                                                               | 23                 |

From: Moher D, Liberati A, Tetzlaff J, Altman DG, The PRISMA Group (2009). Preferred Reporting Items for Systematic Reviews and Meta-Analyses: The PRISMA Statement. PLoS Med 6(7): e1000097. doi:10.1371/journal.pmed1000097

For more information, visit: [www.prisma-statement.org](http://www.prisma-statement.org).

AMSTAR 2: a critical appraisal tool for systematic reviews that include randomised or non-randomised studies of healthcare interventions, or both

|                                                                                                                                                                                                                           |                                                                                                        |                                                 |
|---------------------------------------------------------------------------------------------------------------------------------------------------------------------------------------------------------------------------|--------------------------------------------------------------------------------------------------------|-------------------------------------------------|
| <b>1. Did the research questions and inclusion criteria for the review include the components of PICO?</b>                                                                                                                |                                                                                                        |                                                 |
| For Yes:                                                                                                                                                                                                                  | Optional (recommended)                                                                                 |                                                 |
| <input checked="" type="checkbox"/> Population                                                                                                                                                                            | <input type="checkbox"/> Timeframe for follow-up                                                       | <input checked="" type="checkbox"/> Yes         |
| <input checked="" type="checkbox"/> Intervention                                                                                                                                                                          |                                                                                                        | <input type="checkbox"/> No                     |
| <input checked="" type="checkbox"/> Comparator group                                                                                                                                                                      |                                                                                                        |                                                 |
| <input checked="" type="checkbox"/> Outcome                                                                                                                                                                               |                                                                                                        |                                                 |
| <b>2. Did the report of the review contain an explicit statement that the review methods were established prior to the conduct of the review and did the report justify any significant deviations from the protocol?</b> |                                                                                                        |                                                 |
| For Partial Yes:<br>The authors state that they had a written protocol or guide that included ALL the following:                                                                                                          | For Yes:<br>As for partial yes, plus the protocol should be registered and should also have specified: |                                                 |
| <input checked="" type="checkbox"/> review question(s)                                                                                                                                                                    | <input type="checkbox"/> a meta-analysis/synthesis plan, if appropriate, <i>and</i>                    | <input type="checkbox"/> Yes                    |
| <input checked="" type="checkbox"/> a search strategy                                                                                                                                                                     | <input type="checkbox"/> a plan for investigating causes of heterogeneity                              | <input checked="" type="checkbox"/> Partial Yes |
| <input checked="" type="checkbox"/> inclusion/exclusion criteria                                                                                                                                                          | <input type="checkbox"/> justification for any deviations from the protocol                            | <input type="checkbox"/> No                     |
| <input checked="" type="checkbox"/> a risk of bias assessment                                                                                                                                                             |                                                                                                        |                                                 |
| <b>3. Did the review authors explain their selection of the study designs for inclusion in the review?</b>                                                                                                                |                                                                                                        |                                                 |
| For Yes, the review should satisfy ONE of the following:                                                                                                                                                                  |                                                                                                        |                                                 |
| <input type="checkbox"/> <i>Explanation for including only RCTs</i>                                                                                                                                                       |                                                                                                        | <input checked="" type="checkbox"/> Yes         |
| <input type="checkbox"/> <i>OR Explanation for including only NRSI</i>                                                                                                                                                    |                                                                                                        | <input type="checkbox"/> No                     |
| <input checked="" type="checkbox"/> <i>OR Explanation for including both RCTs and NRSI</i>                                                                                                                                |                                                                                                        |                                                 |
| <b>4. Did the review authors use a comprehensive literature search strategy?</b>                                                                                                                                          |                                                                                                        |                                                 |
| For Partial Yes (all the following):                                                                                                                                                                                      | For Yes, should also have (all the following):                                                         |                                                 |
| <input checked="" type="checkbox"/> searched at least 2 databases (relevant to research question)                                                                                                                         | <input checked="" type="checkbox"/> searched the reference lists / bibliographies of included studies  | <input checked="" type="checkbox"/> Yes         |
| <input checked="" type="checkbox"/> provided key word and/or search strategy                                                                                                                                              | <input checked="" type="checkbox"/> searched trial/study registries                                    | <input type="checkbox"/> Partial Yes            |
| <input checked="" type="checkbox"/> justified publication restrictions (e.g. language)                                                                                                                                    | <input checked="" type="checkbox"/> included/consulted content experts in the field                    | <input type="checkbox"/> No                     |
|                                                                                                                                                                                                                           | <input checked="" type="checkbox"/> where relevant, searched for grey literature                       |                                                 |
|                                                                                                                                                                                                                           | <input checked="" type="checkbox"/> conducted search within 24 months of completion of the review      |                                                 |
| <b>5. Did the review authors perform study selection in duplicate?</b>                                                                                                                                                    |                                                                                                        |                                                 |
| For Yes, either ONE of the following:                                                                                                                                                                                     |                                                                                                        |                                                 |
| <input checked="" type="checkbox"/> at least two reviewers independently agreed on selection of eligible studies and achieved consensus on which studies to include                                                       |                                                                                                        | <input checked="" type="checkbox"/> Yes         |
| <input type="checkbox"/> OR two reviewers selected a sample of eligible studies <u>and</u> achieved good agreement (at least 80 percent), with the remainder selected by one reviewer.                                    |                                                                                                        | <input type="checkbox"/> No                     |

AMSTAR 2: a critical appraisal tool for systematic reviews that include randomised or non-randomised studies of healthcare interventions, or both

|                                                                                                                                                                                                                                                        |                                                                                                                                          |                                                                                                                    |
|--------------------------------------------------------------------------------------------------------------------------------------------------------------------------------------------------------------------------------------------------------|------------------------------------------------------------------------------------------------------------------------------------------|--------------------------------------------------------------------------------------------------------------------|
| <b>6. Did the review authors perform data extraction in duplicate?</b>                                                                                                                                                                                 |                                                                                                                                          |                                                                                                                    |
| For Yes, either ONE of the following:                                                                                                                                                                                                                  |                                                                                                                                          |                                                                                                                    |
| <input checked="" type="checkbox"/> at least two reviewers achieved consensus on which data to extract from included studies                                                                                                                           | <input checked="" type="checkbox"/> Yes                                                                                                  | <input type="checkbox"/> No                                                                                        |
| <input type="checkbox"/> OR two reviewers extracted data from a sample of eligible studies <u>and</u> achieved good agreement (at least 80 percent), with the remainder extracted by one reviewer.                                                     |                                                                                                                                          |                                                                                                                    |
| <b>7. Did the review authors provide a list of excluded studies and justify the exclusions?</b>                                                                                                                                                        |                                                                                                                                          |                                                                                                                    |
| For Partial Yes:                                                                                                                                                                                                                                       | For Yes, must also have:                                                                                                                 |                                                                                                                    |
| <input type="checkbox"/> provided a list of all potentially relevant studies that were read in full-text form but excluded from the review                                                                                                             | <input type="checkbox"/> Justified the exclusion from the review of each potentially relevant study                                      | <input type="checkbox"/> Yes<br><input type="checkbox"/> Partial Yes<br><input checked="" type="checkbox"/> No     |
| <b>8. Did the review authors describe the included studies in adequate detail?</b>                                                                                                                                                                     |                                                                                                                                          |                                                                                                                    |
| For Partial Yes (ALL the following):                                                                                                                                                                                                                   | For Yes, should also have ALL the following:                                                                                             |                                                                                                                    |
| <input checked="" type="checkbox"/> described populations                                                                                                                                                                                              | <input checked="" type="checkbox"/> described population in detail                                                                       | <input checked="" type="checkbox"/> Yes                                                                            |
| <input checked="" type="checkbox"/> described interventions                                                                                                                                                                                            | <input checked="" type="checkbox"/> described intervention in detail (including doses where relevant)                                    | <input type="checkbox"/> Partial Yes                                                                               |
| <input checked="" type="checkbox"/> described comparators                                                                                                                                                                                              | <input checked="" type="checkbox"/> described comparator in detail (including doses where relevant)                                      | <input type="checkbox"/> No                                                                                        |
| <input checked="" type="checkbox"/> described outcomes                                                                                                                                                                                                 | <input checked="" type="checkbox"/> described study's setting                                                                            |                                                                                                                    |
| <input checked="" type="checkbox"/> described research designs                                                                                                                                                                                         | <input checked="" type="checkbox"/> timeframe for follow-up                                                                              |                                                                                                                    |
| <b>9. Did the review authors use a satisfactory technique for assessing the risk of bias (RoB) in individual studies that were included in the review?</b>                                                                                             |                                                                                                                                          |                                                                                                                    |
| <b>RCTs</b>                                                                                                                                                                                                                                            |                                                                                                                                          |                                                                                                                    |
| For Partial Yes, must have assessed RoB from                                                                                                                                                                                                           | For Yes, must also have assessed RoB from:                                                                                               |                                                                                                                    |
| <input checked="" type="checkbox"/> unconcealed allocation, <i>and</i>                                                                                                                                                                                 | <input checked="" type="checkbox"/> allocation sequence that was not truly random, <i>and</i>                                            | <input checked="" type="checkbox"/> Yes                                                                            |
| <input checked="" type="checkbox"/> lack of blinding of patients and assessors when assessing outcomes (unnecessary for objective outcomes such as all-cause mortality)                                                                                | <input checked="" type="checkbox"/> selection of the reported result from among multiple measurements or analyses of a specified outcome | <input type="checkbox"/> Partial Yes<br><input type="checkbox"/> No<br><input type="checkbox"/> Includes only NRSI |
| <b>NRSI</b>                                                                                                                                                                                                                                            |                                                                                                                                          |                                                                                                                    |
| For Partial Yes, must have assessed RoB:                                                                                                                                                                                                               | For Yes, must also have assessed RoB:                                                                                                    |                                                                                                                    |
| <input checked="" type="checkbox"/> from confounding, <i>and</i>                                                                                                                                                                                       | <input checked="" type="checkbox"/> methods used to ascertain exposures and outcomes, <i>and</i>                                         | <input checked="" type="checkbox"/> Yes                                                                            |
| <input checked="" type="checkbox"/> from selection bias                                                                                                                                                                                                | <input checked="" type="checkbox"/> selection of the reported result from among multiple measurements or analyses of a specified outcome | <input type="checkbox"/> Partial Yes<br><input type="checkbox"/> No<br><input type="checkbox"/> Includes only RCTs |
| <b>10. Did the review authors report on the sources of funding for the studies included in the review?</b>                                                                                                                                             |                                                                                                                                          |                                                                                                                    |
| For Yes                                                                                                                                                                                                                                                |                                                                                                                                          |                                                                                                                    |
| <input checked="" type="checkbox"/> Must have reported on the sources of funding for individual studies included in the review. Note: Reporting that the reviewers looked for this information but it was not reported by study authors also qualifies | <input checked="" type="checkbox"/> Yes                                                                                                  | <input type="checkbox"/> No                                                                                        |

AMSTAR 2: a critical appraisal tool for systematic reviews that include randomised or non-randomised studies of healthcare interventions, or both

**11. If meta-analysis was performed did the review authors use appropriate methods for statistical combination of results?**

**RCTs**

For Yes:

- |                                                                                                                                                         |                                                     |
|---------------------------------------------------------------------------------------------------------------------------------------------------------|-----------------------------------------------------|
| <input checked="" type="checkbox"/> The authors justified combining the data in a meta-analysis                                                         | <input checked="" type="checkbox"/> Yes             |
| <input checked="" type="checkbox"/> AND they used an appropriate weighted technique to combine study results and adjusted for heterogeneity if present. | <input type="checkbox"/> No                         |
| <input checked="" type="checkbox"/> AND investigated the causes of any heterogeneity                                                                    | <input type="checkbox"/> No meta-analysis conducted |

**For NRSI**

For Yes:

- |                                                                                                                                                                                                                                           |                                                                |
|-------------------------------------------------------------------------------------------------------------------------------------------------------------------------------------------------------------------------------------------|----------------------------------------------------------------|
| <input type="checkbox"/> The authors justified combining the data in a meta-analysis                                                                                                                                                      | <input type="checkbox"/> Yes                                   |
| <input type="checkbox"/> AND they used an appropriate weighted technique to combine study results, adjusting for heterogeneity if present                                                                                                 | <input type="checkbox"/> No                                    |
| <input type="checkbox"/> AND they statistically combined effect estimates from NRSI that were adjusted for confounding, rather than combining raw data, or justified combining raw data when adjusted effect estimates were not available | <input checked="" type="checkbox"/> No meta-analysis conducted |
| <input type="checkbox"/> AND they reported separate summary estimates for RCTs and NRSI separately when both were included in the review                                                                                                  |                                                                |

**12. If meta-analysis was performed, did the review authors assess the potential impact of RoB in individual studies on the results of the meta-analysis or other evidence synthesis?**

For Yes:

- |                                                                                                                                                                                                                    |                                                     |
|--------------------------------------------------------------------------------------------------------------------------------------------------------------------------------------------------------------------|-----------------------------------------------------|
| <input type="checkbox"/> included only low risk of bias RCTs                                                                                                                                                       | <input checked="" type="checkbox"/> Yes             |
| <input checked="" type="checkbox"/> OR, if the pooled estimate was based on RCTs and/or NRSI at variable RoB, the authors performed analyses to investigate possible impact of RoB on summary estimates of effect. | <input type="checkbox"/> No                         |
|                                                                                                                                                                                                                    | <input type="checkbox"/> No meta-analysis conducted |

**13. Did the review authors account for RoB in individual studies when interpreting/ discussing the results of the review?**

For Yes:

- |                                                                                                                                                                              |                                         |
|------------------------------------------------------------------------------------------------------------------------------------------------------------------------------|-----------------------------------------|
| <input type="checkbox"/> included only low risk of bias RCTs                                                                                                                 | <input checked="" type="checkbox"/> Yes |
| <input checked="" type="checkbox"/> OR, if RCTs with moderate or high RoB, or NRSI were included the review provided a discussion of the likely impact of RoB on the results | <input type="checkbox"/> No             |

**14. Did the review authors provide a satisfactory explanation for, and discussion of, any heterogeneity observed in the results of the review?**

For Yes:

- |                                                                                                                                                                                                                         |                                         |
|-------------------------------------------------------------------------------------------------------------------------------------------------------------------------------------------------------------------------|-----------------------------------------|
| <input type="checkbox"/> There was no significant heterogeneity in the results                                                                                                                                          |                                         |
| <input checked="" type="checkbox"/> OR if heterogeneity was present the authors performed an investigation of sources of any heterogeneity in the results and discussed the impact of this on the results of the review | <input checked="" type="checkbox"/> Yes |
|                                                                                                                                                                                                                         | <input type="checkbox"/> No             |

**15. If they performed quantitative synthesis did the review authors carry out an adequate investigation of publication bias (small study bias) and discuss its likely impact on the results of the review?**

For Yes:

- |                                                                                                                                                                            |                                                     |
|----------------------------------------------------------------------------------------------------------------------------------------------------------------------------|-----------------------------------------------------|
| <input checked="" type="checkbox"/> performed graphical or statistical tests for publication bias and discussed the likelihood and magnitude of impact of publication bias | <input checked="" type="checkbox"/> Yes             |
|                                                                                                                                                                            | <input type="checkbox"/> No                         |
|                                                                                                                                                                            | <input type="checkbox"/> No meta-analysis conducted |

1  
2  
3  
4  
5  
6  
7  
8  
9  
10  
11  
12  
13  
14  
15  
16  
17  
18  
19  
20  
21  
22  
23  
24  
25  
26  
27  
28  
29  
30  
31  
32  
33  
34  
35  
36  
37  
38  
39  
40  
41  
42  
43  
44  
45  
46  
47  
48  
49  
50  
51  
52  
53  
54  
55  
56  
57  
58  
59  
60

AMSTAR 2: a critical appraisal tool for systematic reviews that include randomised or non-randomised studies of healthcare interventions, or both

**16. Did the review authors report any potential sources of conflict of interest, including any funding they received for conducting the review?**

For Yes:

- |                                                                                                                           |                                         |
|---------------------------------------------------------------------------------------------------------------------------|-----------------------------------------|
| <input checked="" type="checkbox"/> The authors reported no competing interests OR                                        | <input checked="" type="checkbox"/> Yes |
| <input type="checkbox"/> The authors described their funding sources and how they managed potential conflicts of interest | <input type="checkbox"/> No             |

**To cite this tool:** Shea BJ, Reeves BC, Wells G, Thuku M, Hamel C, Moran J, Moher D, Tugwell P, Welch V, Kristjansson E, Henry DA. AMSTAR 2: a critical appraisal tool for systematic reviews that include randomised or non-randomised studies of healthcare interventions, or both. *BMJ*. 2017 Sep 21;358:j4008.



## Supplementary Material 4. Characteristics of included intervention studies

| First author, year (setting) | Study Design | Participants                                                                                                                                                                                                                  | Intervention (Description and Dose)                                                                                                                                                                                                                                                                                                                                                                                                              | Control                                            | Outcomes                                                                                                                | Results                                                                                                                                                                                                                                                                                                                                                                                                   |
|------------------------------|--------------|-------------------------------------------------------------------------------------------------------------------------------------------------------------------------------------------------------------------------------|--------------------------------------------------------------------------------------------------------------------------------------------------------------------------------------------------------------------------------------------------------------------------------------------------------------------------------------------------------------------------------------------------------------------------------------------------|----------------------------------------------------|-------------------------------------------------------------------------------------------------------------------------|-----------------------------------------------------------------------------------------------------------------------------------------------------------------------------------------------------------------------------------------------------------------------------------------------------------------------------------------------------------------------------------------------------------|
| Ackley-Holbrook, 2016 (USA)  | Pre Post     | Severe VI or blindness. Recruited through advocacy organizations, online discussion groups and communities, word-of-mouth. Aged $\geq 18$ yrs. Mean age = $47.9 \pm 11.5$ yrs. % Males = UNK n = 21                           | Walking program; 8 weeks, increasing daily step count by 1000 above baseline, progressively higher targets every 2 weeks                                                                                                                                                                                                                                                                                                                         | Baseline step count                                | Daily step count (by pedometer), resting heart rate, blood pressure, body mass, % body fat, waist circumference, lipids | Significant increase in steps per day; (baseline $4925 \pm 2233$ v post $8772 \pm 2916$ , $p < 0.01$ ). No significant differences in other measures. Reported improvements in cardiovascular endurance and productivity (93%), mood and mental health (73%), outlook on life, self confidence and functional mobility (67%).                                                                             |
| Campbell, 2005 (NZ)          | RCT          | Visual acuity of 6/24 or worse. Recruited via register for the blind, hospital outpatient clinics, private ophthalmology practice. Living in community. Aged $\geq 75$ . Mean age = $83.6 \pm 4.8$ yrs % Males = 32% n = 391  | Four groups; 1) Otago exercise program (Muscle strengthening and balance retraining exercises that progress in difficulty) and walking plan; 5 home visits from a physiotherapist, 3 X 30min per week of exercises plus walking twice a week. n=97 2) Home safety program (Home visit to identify hazards and provision of recommendations to prevent falls). n=100 3) Exercise and home safety program. n=98 4) Control (social visits). n = 96 | Two social visits during the first six months      | Number of falls and fall related injuries                                                                               | 15% more falls observed in the exercise program (incidence rate ratio = 0.59 [CI 0.42-0.83] v 1.15 [CI 0.82-1.61], however a higher level of adherence led to fewer falls ( $p=0.001$ ). 41% fewer falls in the home safety program. One year of follow up.                                                                                                                                               |
| Chen, 2012 (HK)              | RCT          | Low vision (6/18 - 3/60) and blind (3/60 or worse). Living in a residential care home. Aged $\geq 70$ . Mean age = $85.5 \pm 6.9$ yrs (experimental) and $82.9 \pm 7.5$ yrs (control) % Males = UNK n = 40                    | Modified 8-form Yang style Tai Chi, emphasizing multi-directional weight shifting, head and trunk rotation and awareness of body alignment; 1.5 hours, 3 times a week, for 16 weeks. n = 21 in intervention                                                                                                                                                                                                                                      | Music percussion activity (djembe i.e. drumming)   | Knee proprioception, muscle strength (in knee extensors and flexors), balance                                           | Experimental group showed significant improvements in knee proprioception (percentage change of absolute angle error = $-25.9 \pm 28.8\%$ v $4.2 \pm 30.7\%$ , $p=0.032$ ) and balance control (greater percentage change in visual ratio ( $58.1 \pm 41.9\%$ v $-1.6 \pm 29.4\%$ , $p=0.006$ ) and vestibular ratio ( $32.5 \pm 40.2\%$ v $-17.8 \pm 56.8\%$ , $p=0.048$ ). Intention to treat analysis. |
| Cheung, 2008 (HK)            | RCT          | No light perception or VI of 6/120 or worse in better eye with corrective device. Living in care and attention homes. Aged $\geq 65$ . Mean age = $83 \pm 4.7$ yrs (experimental) and $84 \pm 6.5$ yrs (control) % Males = 0% | Structured, individually tailored exercise program designed by a physiotherapist, including warm up, lower limb strengthening exercises (increasing in repetitions and weights), balance exercises. Plus routine group physical activity. 3 X 45 min per week, for 12 weeks n = 27 in intervention.                                                                                                                                              | Routine group physical activity only in care home. | Balance and muscle strength.                                                                                            | Significant improvements in BBS (9.4%, $p < 0.000$ ), TUG (decrease of 4.7 sec, $p < 0.0003$ ) and CST (decrease of 2.35 sec, $p=0.047$ )                                                                                                                                                                                                                                                                 |

|                        |          |                                                                                                                                                                                                                                                                   |                                                                                                                                                                      |                                             |                                                                                                                                                         |                                                                                                                                                                                                                                                                                                                                                                                                                                                                                                                                                                                                                                                                               |
|------------------------|----------|-------------------------------------------------------------------------------------------------------------------------------------------------------------------------------------------------------------------------------------------------------------------|----------------------------------------------------------------------------------------------------------------------------------------------------------------------|---------------------------------------------|---------------------------------------------------------------------------------------------------------------------------------------------------------|-------------------------------------------------------------------------------------------------------------------------------------------------------------------------------------------------------------------------------------------------------------------------------------------------------------------------------------------------------------------------------------------------------------------------------------------------------------------------------------------------------------------------------------------------------------------------------------------------------------------------------------------------------------------------------|
|                        |          | n = 50                                                                                                                                                                                                                                                            |                                                                                                                                                                      |                                             |                                                                                                                                                         |                                                                                                                                                                                                                                                                                                                                                                                                                                                                                                                                                                                                                                                                               |
| Gleeson, 2015 (AUS)    | RCT      | Participants recruited from Guide Dogs Australia. Aged $\geq 50$ . Mean age = $75 \pm 11$ yrs. % Males = 29% n = 120                                                                                                                                              | Alexander Technique, 1 X 30 min lesson per week, for 12 weeks, plus usual care. n = 60 in intervention.                                                              | Usual care from Guide Dogs Australia.       | Short Physical Performance Battery (sit-to-stand, 4m walk test, standing balance test). Postural sway tests, maximal balance range and number of falls. | No statistically significant improvements in primary outcomes at 3 or 12 months between groups. Intervention group reduced postural sway on a firm surface (eyes open) at 3mths (-29.59mm, $P < 0.01$ ).                                                                                                                                                                                                                                                                                                                                                                                                                                                                      |
| Gleeson, 2017 (AUS)    | RCT      | As per Gleeson 2015                                                                                                                                                                                                                                               | As per Gleeson 2015,                                                                                                                                                 | As per Gleeson 2015                         | Social and emotional wellbeing                                                                                                                          | No statistically significant improvements at 3 or 12 months. Emotional subscale approached significance ( $p = 0.06$ ) in favor of intervention at three mths.                                                                                                                                                                                                                                                                                                                                                                                                                                                                                                                |
| Hackney, 2015 (USA)    | RCT      | VI in range 20/30 – 20/632. Recruited from Medical Centre, Senior Independent Living communities, community senior centres. Mean age = $79.3 \pm 11$ yrs % Males = 47% n = 32                                                                                     | Adapted Tango Classes, 2 X 1.5 hours per week, for 10-12 weeks (total 30 hours). n = 14 Tango intervention.                                                          | FallProof Program                           | Balance, Mobility, Gait speed and quality-of-life.                                                                                                      | Tango and FallProof groups showed improvements on BBS ( $p = 0.001$ ). SOT scores improved by 14% in Tango group and 22% in FallProof. Tango group significantly improved on 6MWT ( $p = 0.016$ ), cognitive-TUG ( $p = 0.03$ ) and gait ( $p < 0.001$ ). Last observation carried forward analysis.                                                                                                                                                                                                                                                                                                                                                                          |
| Jeter, 2012 (USA)      | Pre Post | Visual field $< 20$ deg and/or visual acuity $< 20/200$ . Recruited from Low Vision Clinic of tertiary hospital and local community based listings. Mean age = $46 \pm 12$ yrs. % Males = 30% n = 10                                                              | Ashtanga-Based Yoga (AYT), 1 X orientation session, 1 class per week and 2 sessions per week at home, for 8 weeks.                                                   | None                                        | Sleep, anxiety, depression, stress, balance, respiratory rate, mindfulness, balance                                                                     | Improvements observed in all pre-post measures (descriptive analysis only). Exit surveys showed 5/8 reported reduced stress, 3/8 reported improved sleep. 7/8 reported improved relaxation and focus. 8/8 expressed an interest in a yoga program like this in the future. 8/8 subjects were extremely or mostly satisfied with program.                                                                                                                                                                                                                                                                                                                                      |
| Jeter 2015 (USA)       | RCT      | Corrected visual acuity worse than 20/200 and/or visual field less than 20 deg in diameter (legal blindness). Recruited from Low Vision Clinic of tertiary hospital. Mean age = $55 \pm 17$ yrs (experimental) and $55 \pm 10$ yrs (control) % Males = 29% n = 21 | Ashtanga-Based Yoga (AYT), 1 X orientation session, 1 class per week and 2 sessions per week at home, for 8 weeks. n = 11 in intervention                            | Waitlist Control                            | Postural stability, balance, physical function                                                                                                          | Absolute values of mean total velocity significantly increased in AYT group (Eyes Open; $t(8) = -3.66$ , $p = 0.01$ and Eyes Closed; $t(8) = -3.90$ , $p = 0.01$ ). Significant baseline post AYT increase in somatosensory contribution to balance SI velocity (Eyes Open; $t(8) = -2.42$ , $p = 0.04$ and Eyes Closed; $t(8) = -3.96$ , $p = 0.01$ ). Significant increase in vestibular contribution to balance ( $t(8) = -2.47$ , $p = 0.04$ ). Significant increase in one leg stand ( $z = -2.10$ , $p = 0.04$ ), chair sit and reach ( $z = 2.22$ , $p = 0.01$ ), and 30s chair stand ( $z = -1.98$ , $p = 0.05$ ) following AYT program. No changes in control group. |
| Kingston, 2018 (USA)   | Pre Post | No definition of blindness reported. Recruited from Blind Centre. Mean age = 80 yrs. % Males = 88% n = 24                                                                                                                                                         | Matter of Balance program (CBT and exercise training in 6 of 8 sessions; Tennstedt, 1998 ). 2 X 2 hours per week for 4 weeks.                                        | None                                        | Mobility and balance                                                                                                                                    | Mean decrease of 2.15 sec on TUG, small increase in total POMA (1.5 points)                                                                                                                                                                                                                                                                                                                                                                                                                                                                                                                                                                                                   |
| Kovács, 2012 (Hungary) | RCT      | Visual acuity 20/30-20/400. Recruited from National Institution for Blind People. Aged $\geq 60$ years and over.                                                                                                                                                  | Multimodal program - balance and strength exercises based on Otago Exercise Program, using increasing weights. Included 20-30min/day walking program. 30min X 2 week | Standard osteoporosis program alone (4Xwk). | Balance, everyday living activities, mobility, falls                                                                                                    | Significant improvements in experimental group pre and post intervention (BBS $41.81 \pm 7.52$ v $45.09 \pm 7.41$ $p = 0.036$ , TUG $20.72 \pm 4.87$ v $17.93 \pm 4.96$ $p < 0.005$ ). TUG time differed significantly between experimental and control ( $p = 0.001$ ). Number of falls = 22.                                                                                                                                                                                                                                                                                                                                                                                |

|                         |          |                                                                                                                                                                                                                                                                                                            |                                                                                                                                                                                                                                                           |                 |                                                                                                                       |                                                                                                                                                                                                                                                                                                                                                                 |
|-------------------------|----------|------------------------------------------------------------------------------------------------------------------------------------------------------------------------------------------------------------------------------------------------------------------------------------------------------------|-----------------------------------------------------------------------------------------------------------------------------------------------------------------------------------------------------------------------------------------------------------|-----------------|-----------------------------------------------------------------------------------------------------------------------|-----------------------------------------------------------------------------------------------------------------------------------------------------------------------------------------------------------------------------------------------------------------------------------------------------------------------------------------------------------------|
|                         |          | Mean age = 68.7 ± 6.9 yrs (experimental) and 69.7 ± 6.5 yrs (control).<br>% Males = 0%<br>n = 41                                                                                                                                                                                                           | multimodal exercise program + 2 X week standard osteoporosis program, for 6 months.<br>n = 21 in intervention                                                                                                                                             |                 |                                                                                                                       | Significantly shorter time to first fall in the control group (15 wks. V 19 weeks, p = 0.049).                                                                                                                                                                                                                                                                  |
| Larsson, 2006 (Sweden)  | Pre Post | Visual acuity of less than 0.05 in best eye or visual field less than 5 deg. Recruited from Low Vision Clinic.<br>Of working age.<br>Mean age = 52.3 ± 11.4 yrs<br>% Males = 14% (of final participants)<br>n = 8                                                                                          | Body awareness exercises and dance based training. 75min X 2 sessions week, for 8 weeks.                                                                                                                                                                  | None            | Balance, functional reach, functional balance, mobility, gait speed, Activity scale                                   | Statistically significant improvements observed in;<br>Functional reach = 6/7<br>TUG = 1/7<br>Max. Gait speed = 2/7<br>One leg stance (left) = 3/7<br>One leg stance (right) = 2/7<br>Max. Step length = 5/7                                                                                                                                                    |
| Miszko, 2004 (USA)      | Pre Post | Recruited from local rehabilitation centre.<br>Mean age = 52.6 ± 12.8 yrs.<br>% Males = 70%<br>n = 10                                                                                                                                                                                                      | Tai Chi Classes. 2 X 1 hour, per week for 8 weeks, 15min per day outside of class, plus regular orientation and mobility training.                                                                                                                        | None            | Muscular strength, work and power of knee; balance; functional reach and quality of life                              | Improvements seen in muscular strength (flexion 16.5%, extension 16.9%), power (flexion 30%, extension 6.8%), and work (flexion 17.7%, extension 17.1%), small change in functional reach (0.75%) and BBS (2%), improvement in single stance time (6.3%). Improvement in frequency, independence and satisfaction with performing mobility tasks after tai chi. |
| Ponchillia, 1992 (USA)  | Pre Post | Congenital total blindness. Recruited from University. Aged 24-37 yrs.<br>% Males = 0%<br>n = 3                                                                                                                                                                                                            | Aerobics sessions led by trained instructor including high and low impact movements. 2 X 50 minutes per week, for 7 weeks.                                                                                                                                | None            | Skinfolds, abdominal muscle strength and endurance, flexibility, heart rate, accuracy of performing tasks, step test. | Favorable changes in fitness based on step test, abdominal strength and endurance (24% mean increase on sit up test), body fat (mean 3.5% decrease) and accuracy of performance.                                                                                                                                                                                |
| Salari, 2013 (Iran)     | Pre Post | Blind athletes.<br>Mean age = 22.4 ± 5.4 yrs.<br>% Males = 0 %<br>n = 30                                                                                                                                                                                                                                   | Core stability training program. Approximately 3 X 1hr per week (every two days), for 8 weeks                                                                                                                                                             | None            | Balance (measured by Flamingo Test and Y balance)                                                                     | Significant increase in static and dynamic balance in anterior direction, internal posterior, external posterior and total balance.                                                                                                                                                                                                                             |
| Surakka, 2008 (Finland) | Pre Post | Partially sighted, blind or deaf-blind individuals.<br>Mean age = 54 ± 9.9 yrs.<br>% Males = 33% (of final participants)<br>n = 27                                                                                                                                                                         | Physical training including movements to improve balance, coordination, relax neck and shoulder muscles. 60 minutes 3 X per week for 5-6 weeks.                                                                                                           | None            | Physical condition, mental state and balance.                                                                         | Self reported improvements in physical condition (22/24), mental state (21/24) and balance (11/24). Main motivators were better physical condition (21/24) and peer group (12/24)                                                                                                                                                                               |
| Surakka, 2011 (Finland) | RCT      | Partially sighted (best corrected visual acuity < 0.3) or blind (visual acuity < 0.1, or visual field < 10 deg with glare and hemeralopia). Recruited from Rehabilitation Services at a tertiary hospital.<br>Mean age = 55 ± 9.0 yrs (experimental) and 57 ± 7.2yrs (control).<br>% Males = 45%<br>n = 29 | Physical training designed for VI and deaf-blind persons to improve balance, posture, coordination, tense neck and shoulder muscles, and loss of spinal rotation and reciprocal arm swing. 60 minutes 3 X per week for 5-6 weeks.<br>N=15 in intervention | No intervention | Flexibility                                                                                                           | Significant improvement in flexibility of trunk in the experimental v control group (p=0.0068).                                                                                                                                                                                                                                                                 |

|                                                                                                   |            |                                                                                                                                                                                                                                                                  |                                                                                                                                                                                                                                                                                                                                                                                    |                                      |                                                                         |                                                  |
|---------------------------------------------------------------------------------------------------|------------|------------------------------------------------------------------------------------------------------------------------------------------------------------------------------------------------------------------------------------------------------------------|------------------------------------------------------------------------------------------------------------------------------------------------------------------------------------------------------------------------------------------------------------------------------------------------------------------------------------------------------------------------------------|--------------------------------------|-------------------------------------------------------------------------|--------------------------------------------------|
| <p>1<br/>2<br/>3<br/>4<br/>5<br/>6<br/>7<br/>8<br/>9<br/>10<br/>11</p> <p>Waterman, 2016 (UK)</p> | <p>RCT</p> | <p>Binocular visual acuity &gt; 0.6, Snellen equivalent = 6/24 and/or moderate visual field loss (&gt;20% of the test locations in a binocular Esterman test).<br/>Recruited from the community.<br/>Mean age = 81.4 ± 8.6 yrs.<br/>% Males = 35%<br/>n = 49</p> | <p>Home Safety Arm (occupational therapist discussion with participants and action plan to alter environment to reduce risk of falls).<br/>Home exercise program arm (based on Otago Exercise Program involving strength and balance exercises in addition to walking).<br/>30min X 3 times per week plus walking X 2 times per week, for 6 months.<br/>n = 17 in intervention</p> | <p>Usual care plus social visits</p> | <p>Number of falls, fear of falls, adherence rates, quality of life</p> | <p>No statistically significant differences.</p> |
|---------------------------------------------------------------------------------------------------|------------|------------------------------------------------------------------------------------------------------------------------------------------------------------------------------------------------------------------------------------------------------------------|------------------------------------------------------------------------------------------------------------------------------------------------------------------------------------------------------------------------------------------------------------------------------------------------------------------------------------------------------------------------------------|--------------------------------------|-------------------------------------------------------------------------|--------------------------------------------------|

12  
13  
14  
15  
16  
17  
18  
19  
20  
21  
22  
23  
24  
25  
26  
27  
28  
29  
30  
31  
32  
33  
34  
35  
36  
37  
38  
39  
40  
41  
42  
43  
44  
45  
46

Abbreviations: AUS = Australia, AYT = Ashtanga-Based Yoga, BBS = Berg Balance Score, CST = Chair Stand Test, HK = Hong Kong, NZ = New Zealand, POMA = Performance Oriented Mobility Assessment, RCT = Randomized Controlled Trial, SOT = Sensory organization test, 6MWT = Six minute walk test, TUG = Timed Up and Go, UK = United Kingdom, USA = United States of America, VI = visual impairment.



# PRISMA 2009 Checklist

| Section/topic                      | #  | Checklist item                                                                                                                                                                                                                                                                                              | Reported on page # |
|------------------------------------|----|-------------------------------------------------------------------------------------------------------------------------------------------------------------------------------------------------------------------------------------------------------------------------------------------------------------|--------------------|
| <b>TITLE</b>                       |    |                                                                                                                                                                                                                                                                                                             |                    |
| Title                              | 1  | Identify the report as a systematic review, meta-analysis, or both.                                                                                                                                                                                                                                         | 1                  |
| <b>ABSTRACT</b>                    |    |                                                                                                                                                                                                                                                                                                             |                    |
| Structured summary                 | 2  | Provide a structured summary including, as applicable: background; objectives; data sources; study eligibility criteria, participants, and interventions; study appraisal and synthesis methods; results; limitations; conclusions and implications of key findings; systematic review registration number. | 2                  |
| <b>INTRODUCTION</b>                |    |                                                                                                                                                                                                                                                                                                             |                    |
| Rationale                          | 3  | Describe the rationale for the review in the context of what is already known.                                                                                                                                                                                                                              | 4-6                |
| Objectives                         | 4  | Provide an explicit statement of questions being addressed with reference to participants, interventions, comparisons, outcomes, and study design (PICOS).                                                                                                                                                  | 5-6                |
| <b>METHODS</b>                     |    |                                                                                                                                                                                                                                                                                                             |                    |
| Protocol and registration          | 5  | Indicate if a review protocol exists, if and where it can be accessed (e.g., Web address), and, if available, provide registration information including registration number.                                                                                                                               | 7                  |
| Eligibility criteria               | 6  | Specify study characteristics (e.g., PICOS, length of follow-up) and report characteristics (e.g., years considered, language, publication status) used as criteria for eligibility, giving rationale.                                                                                                      | 7                  |
| Information sources                | 7  | Describe all information sources (e.g., databases with dates of coverage, contact with study authors to identify additional studies) in the search and date last searched.                                                                                                                                  | 8                  |
| Search                             | 8  | Present full electronic search strategy for at least one database, including any limits used, such that it could be repeated.                                                                                                                                                                               | Supp 1             |
| Study selection                    | 9  | State the process for selecting studies (i.e., screening, eligibility, included in systematic review, and, if applicable, included in the meta-analysis).                                                                                                                                                   | 6-7                |
| Data collection process            | 10 | Describe method of data extraction from reports (e.g., piloted forms, independently, in duplicate) and any processes for obtaining and confirming data from investigators.                                                                                                                                  | 8-9                |
| Data items                         | 11 | List and define all variables for which data were sought (e.g., PICOS, funding sources) and any assumptions and simplifications made.                                                                                                                                                                       | 8-9                |
| Risk of bias in individual studies | 12 | Describe methods used for assessing risk of bias of individual studies (including specification of whether this was done at the study or outcome level), and how this information is to be used in any data synthesis.                                                                                      | 9                  |
| Summary measures                   | 13 | State the principal summary measures (e.g., risk ratio, difference in means).                                                                                                                                                                                                                               | 9                  |
| Synthesis of results               | 14 | Describe the methods of handling data and combining results of studies, if done, including measures of consistency (e.g., $I^2$ ) for each meta-analysis.                                                                                                                                                   | 9                  |



# PRISMA 2009 Checklist

| Section/topic                 | #  | Checklist item                                                                                                                                                                                           | Reported on page # |
|-------------------------------|----|----------------------------------------------------------------------------------------------------------------------------------------------------------------------------------------------------------|--------------------|
| Risk of bias across studies   | 15 | Specify any assessment of risk of bias that may affect the cumulative evidence (e.g., publication bias, selective reporting within studies).                                                             | 9                  |
| Additional analyses           | 16 | Describe methods of additional analyses (e.g., sensitivity or subgroup analyses, meta-regression), if done, indicating which were pre-specified.                                                         | NA                 |
| <b>RESULTS</b>                |    |                                                                                                                                                                                                          |                    |
| Study selection               | 17 | Give numbers of studies screened, assessed for eligibility, and included in the review, with reasons for exclusions at each stage, ideally with a flow diagram.                                          | 10, Fig 1          |
| Study characteristics         | 18 | For each study, present characteristics for which data were extracted (e.g., study size, PICOS, follow-up period) and provide the citations.                                                             | 10-15              |
| Risk of bias within studies   | 19 | Present data on risk of bias of each study and, if available, any outcome level assessment (see item 12).                                                                                                | 17-18              |
| Results of individual studies | 20 | For all outcomes considered (benefits or harms), present, for each study: (a) simple summary data for each intervention group (b) effect estimates and confidence intervals, ideally with a forest plot. | Fig 2              |
| Synthesis of results          | 21 | Present results of each meta-analysis done, including confidence intervals and measures of consistency.                                                                                                  | Fig 2              |
| Risk of bias across studies   | 22 | Present results of any assessment of risk of bias across studies (see Item 15).                                                                                                                          | 18                 |
| Additional analysis           | 23 | Give results of additional analyses, if done (e.g., sensitivity or subgroup analyses, meta-regression [see Item 16]).                                                                                    | NA                 |
| <b>DISCUSSION</b>             |    |                                                                                                                                                                                                          |                    |
| Summary of evidence           | 24 | Summarize the main findings including the strength of evidence for each main outcome; consider their relevance to key groups (e.g., healthcare providers, users, and policy makers).                     | 19-22              |
| Limitations                   | 25 | Discuss limitations at study and outcome level (e.g., risk of bias), and at review-level (e.g., incomplete retrieval of identified research, reporting bias).                                            | 21-22              |
| Conclusions                   | 26 | Provide a general interpretation of the results in the context of other evidence, and implications for future research.                                                                                  | 22                 |
| <b>FUNDING</b>                |    |                                                                                                                                                                                                          |                    |
| Funding                       | 27 | Describe sources of funding for the systematic review and other support (e.g., supply of data); role of funders for the systematic review.                                                               | 23                 |

From: Moher D, Liberati A, Tetzlaff J, Altman DG, The PRISMA Group (2009). Preferred Reporting Items for Systematic Reviews and Meta-Analyses: The PRISMA Statement. PLoS Med 6(7): e1000097. doi:10.1371/journal.pmed1000097

For more information, visit: [www.prisma-statement.org](http://www.prisma-statement.org).

# BMJ Open

## Physical Activity Interventions for Adults who are Visually Impaired: A Systematic Review and Meta-Analysis

|                                 |                                                                                                                                                                                                                                                                                                                                                                                                                                                                                                                                                                                                                                                                                                                                                                       |
|---------------------------------|-----------------------------------------------------------------------------------------------------------------------------------------------------------------------------------------------------------------------------------------------------------------------------------------------------------------------------------------------------------------------------------------------------------------------------------------------------------------------------------------------------------------------------------------------------------------------------------------------------------------------------------------------------------------------------------------------------------------------------------------------------------------------|
| Journal:                        | <i>BMJ Open</i>                                                                                                                                                                                                                                                                                                                                                                                                                                                                                                                                                                                                                                                                                                                                                       |
| Manuscript ID                   | bmjopen-2019-034036.R1                                                                                                                                                                                                                                                                                                                                                                                                                                                                                                                                                                                                                                                                                                                                                |
| Article Type:                   | Original research                                                                                                                                                                                                                                                                                                                                                                                                                                                                                                                                                                                                                                                                                                                                                     |
| Date Submitted by the Author:   | 28-Dec-2019                                                                                                                                                                                                                                                                                                                                                                                                                                                                                                                                                                                                                                                                                                                                                           |
| Complete List of Authors:       | Sweeting, Joanna; The University of Sydney, Charles Perkins Centre; The University of Sydney School of Public Health, Prevention Research Collaboration<br>Merom, Dafna; Western Sydney University School of Science and Health, Physical Activity and Health<br>Astuti, Putu; The University of Sydney School of Public Health, Prevention Research Collaboration; Universitas Udayana, Department of Public Health and Faculty of Medicine<br>Antoun, Michael; The University of Sydney, Sydney Dental School<br>Edwards, Kate; The University of Sydney, Charles Perkins Centre; The University of Sydney, Faculty of Health Sciences<br>Ding, Ding; The University of Sydney, Charles Perkins Centre; The University of Sydney, Prevention Research Collaboration |
| <b>Primary Subject Heading</b>: | Public health                                                                                                                                                                                                                                                                                                                                                                                                                                                                                                                                                                                                                                                                                                                                                         |
| Secondary Subject Heading:      | Sports and exercise medicine                                                                                                                                                                                                                                                                                                                                                                                                                                                                                                                                                                                                                                                                                                                                          |
| Keywords:                       | PUBLIC HEALTH, SPORTS MEDICINE, PREVENTIVE MEDICINE                                                                                                                                                                                                                                                                                                                                                                                                                                                                                                                                                                                                                                                                                                                   |
|                                 |                                                                                                                                                                                                                                                                                                                                                                                                                                                                                                                                                                                                                                                                                                                                                                       |

SCHOLARONE™  
Manuscripts



I, the Submitting Author has the right to grant and does grant on behalf of all authors of the Work (as defined in the below author licence), an exclusive licence and/or a non-exclusive licence for contributions from authors who are: i) UK Crown employees; ii) where BMJ has agreed a CC-BY licence shall apply, and/or iii) in accordance with the terms applicable for US Federal Government officers or employees acting as part of their official duties; on a worldwide, perpetual, irrevocable, royalty-free basis to BMJ Publishing Group Ltd ("BMJ") its licensees and where the relevant Journal is co-owned by BMJ to the co-owners of the Journal, to publish the Work in this journal and any other BMJ products and to exploit all rights, as set out in our [licence](#).

The Submitting Author accepts and understands that any supply made under these terms is made by BMJ to the Submitting Author unless you are acting as an employee on behalf of your employer or a postgraduate student of an affiliated institution which is paying any applicable article publishing charge ("APC") for Open Access articles. Where the Submitting Author wishes to make the Work available on an Open Access basis (and intends to pay the relevant APC), the terms of reuse of such Open Access shall be governed by a Creative Commons licence – details of these licences and which [Creative Commons](#) licence will apply to this Work are set out in our licence referred to above.

Other than as permitted in any relevant BMJ Author's Self Archiving Policies, I confirm this Work has not been accepted for publication elsewhere, is not being considered for publication elsewhere and does not duplicate material already published. I confirm all authors consent to publication of this Work and authorise the granting of this licence.



# Physical Activity Interventions for Adults who are Visually Impaired: A Systematic Review and Meta-Analysis

Sweeting, J.<sup>1, 2</sup>, Merom, D.<sup>3</sup>, Astuti, P.A.S.<sup>2, 4</sup>, Antoun, M.<sup>5</sup>, Edwards, K.M.<sup>1, 6</sup>, and Ding, D.<sup>1, 2</sup>

<sup>1</sup> Charles Perkins Centre, the University of Sydney, Camperdown, New South Wales, Australia.

<sup>2</sup> Prevention Research Collaboration, Sydney School of Public Health, the University of Sydney, Camperdown, New South Wales, Australia.

<sup>3</sup> Physical Activity and Health, School of Science and Health, Western Sydney University, Campbelltown, New South Wales, Australia.

<sup>4</sup> Department of Public Health and Faculty of Medicine, Universitas Udayana, Bali, Indonesia.

<sup>5</sup> Sydney Dental School, the University of Sydney, Camperdown, NSW, Australia.

<sup>6</sup> Faculty of Health Sciences, the University of Sydney, Cumberland, New South Wales, Australia.

## Corresponding Author:

Joanna Sweeting

Address: Charles Perkins Centre, University of Sydney, Camperdown, New South Wales, Australia.

Email: [joanna.sweeting@sydney.edu.au](mailto:joanna.sweeting@sydney.edu.au)

Phone: +61 2 8627 1842 (D. Ding)

**Word Count:** 3,765

*I, the Submitting Author has the right to grant and does grant on behalf of all authors of the Work (as defined in the below author licence), an exclusive licence and/or a non-exclusive licence for contributions from authors who are: i) UK Crown employees; ii) where BMJ has agreed a CC-BY licence shall apply, and/or iii) in accordance with the terms applicable for US Federal Government officers or employees acting as part of their official duties; on a worldwide, perpetual, irrevocable, royalty-free basis to BMJ Publishing Group Ltd ("BMJ") its licensees and where the relevant Journal is co-owned by BMJ to the co-owners of the Journal, to publish the Work in BMJ Open and any other BMJ products and to exploit all rights, as set out in our licence.*

## ABSTRACT

Objectives: Compared with sighted individuals, people with visual impairment have a higher prevalence of chronic conditions and lower levels of physical activity. This review aims to systematically review physical activity interventions for those with a visual impairment and to assess their effectiveness.

Design: A systematic review of articles reporting physical activity interventions in visually impaired individuals was conducted. Medline, EMBASE, The Cochrane Library, Cumulative Index to Nursing and Allied Health Literature (CINAHL), SPORTDiscus, and the Physiotherapy Evidence Database (PEDro) were searched in August 2018. Meta-analyses were conducted on randomised controlled trials with the same outcome measure.

Setting: Most interventions were conducted in a group setting, with some including an at-home, self-directed component.

Participants: Following identification of a recent systematic review of physical activity interventions in children, our review focused on adults aged 18 years and older with a visual impairment.

Primary and secondary outcome measures: Outcomes included measures of balance, mobility, mental well-being (e.g. quality of life), number of falls, muscle strength, flexibility, and gait.

Results: Eighteen papers from 17 studies met inclusion criteria. Physical activity components include falls prevention and/or balance-based activities, walking, Tai Chi, Alexander Technique, Yoga, dance, aerobics and core stability training. Significant results in favour of the intervention were reported most commonly in measures of functional capacity (9/17 studies) and in falls/balance related outcomes (7/13 studies). The studies

1 identified were generally small and diverse in study design, and risk of bias was high  
2  
3  
4 across several categories for most studies. Meta-analyses indicated non-significant effects  
5  
6 of the included interventions on the Timed Up and Go, Chair Sit Test and Berg Balance  
7  
8 Scale.  
9

10  
11 Conclusions: Physical activity interventions in individuals with visual impairment  
12  
13 incorporating activities such as Tai Chi, Yoga and dance can have positive results,  
14  
15 particularly in physical measures such as mobility and balance. However, when performing  
16  
17 a meta-analysis of randomised control trials, the evidence for effectiveness is less clear.  
18  
19 More studies with larger sample sizes, stronger designs, and longer follow-up periods are  
20  
21 needed.  
22  
23  
24

25  
26 PROSPERO Registration: PROSPERO CRD42018103638; record available from  
27  
28 [https://www.crd.york.ac.uk/prospero/display\\_record.php?RecordID=103638](https://www.crd.york.ac.uk/prospero/display_record.php?RecordID=103638)  
29  
30  
31  
32  
33

## 34 35 **ARTICLE SUMMARY**

36  
37  
38 Strengths and limitations of this study  
39

- 40  
41 • This systematic review was registered a priori and conducted in line with PRISMA  
42  
43 and AMSTAR 2 guidelines.  
44
- 45  
46 • Six databases were used and a back-reference search of all included studies was  
47  
48 conducted, with no limit on language or year of publication imposed.  
49
- 50  
51 • Risk of bias analysis was conducted independently by two reviewers using the  
52  
53 validated Cochrane Collaboration tool.  
54
- 55  
56 • A lack in common outcome measures allowed inclusion of only four studies in the  
57  
58 meta-analysis.  
59  
60

## INTRODUCTION

Physical activity is well established as a prophylactic for many non-communicable diseases including cardiovascular disease, certain cancers, hypertension and type 2 diabetes.(1, 2) In addition to physical health, regular physical activity is also known to benefit psychological wellbeing including a reduction in the risk of depression and anxiety, lowering of stress levels and improving mood.(3, 4) The Centers for Disease Control and Prevention (CDC) recommends at least 150 minutes per week of moderate-intensity aerobic physical activity (or equivalent vigorous activity) for adults (aged 18-64).(5) However, with the global prevalence of insufficient physical activity at nearly 30% in 2016, it is imperative that regular physical activity continues to be promoted and encouraged worldwide.(6) This is important not only in healthy populations, but also in those with diseases and conditions, such as cardiovascular disease and disabilities such as visual impairment. As highlighted by the CDC in the current physical activity guidelines, there is strong evidence that regular physical activity conveys important health benefits for individuals with a disability.(5) However, adults with disabilities are three times more likely to have chronic conditions such as heart disease, diabetes and cancer, and nearly 50% of adults with a disability undertake no leisure time physical activity.(6) More research among those with specific disabilities is needed to address these gaps and improve health outcomes for those with a disability.(7)

In the United States, the five most common functional disabilities are in mobility, cognition, independent living, hearing and vision.(8) In 2015, an estimated 36 million people worldwide were blind (0.49% of the total population, visual acuity worse than 3/60), 217 million (2.95%) had moderate or severe vision impairment (visual acuity worse than 6/18 and 6/60, respectively) and another 189 million (2.57%) had mild vision impairment (visual acuity worse than 6/12). The most common causes of vision impairment include

1  
2 uncorrected refractive errors, cataracts, age-related macular degeneration, glaucoma, and  
3  
4 diabetic retinopathy.(9)  
5  
6

7 Visual impairment has been shown to detrimentally impact quality of life (10, 11) and to be  
8  
9 associated with depression.(12) Also concerning is the fact that studies have shown a  
10  
11 higher mortality rate for visually impaired individuals compared with their sighted  
12  
13 counterparts, although the underlying reasons are uncertain.(13, 14) Even at the mild end  
14  
15 of the impairment spectrum, loss of vision can affect health and wellbeing, for example,  
16  
17 through restriction of driving, potentially impacting an individual's sense of autonomy and  
18  
19 freedom.(15) Vision impairment has also been shown to be associated with less time  
20  
21 spent in moderate-vigorous physical activity in the range of 26-48% compared to sighted  
22  
23 individuals.(16-18) One potential reason for this discrepancy is the fear of falling  
24  
25 associated with loss of vision and consequent poor balance.(16, 17) For those able to  
26  
27 navigate their local environment with the assistance of a guide dog or cane, physical  
28  
29 barriers such as uneven, slippery or blocked footpaths can make it difficult to perform  
30  
31 adequate physical activity.(19) With the adverse effects that visual impairment can have  
32  
33 on wellbeing, and extra challenges those with visual impairments face, it is of upmost  
34  
35 importance that physical activity is encouraged in this population, given its beneficial  
36  
37 impact on health and wellbeing.  
38  
39  
40  
41  
42  
43  
44

45 To date, few interventions have included participants with vision impairment. In fact, it is  
46  
47 more often the case that visual impairment or blindness are exclusion factors from physical  
48  
49 activity interventions. With increasing recognition of the health disparities experienced by  
50  
51 people living with disabilities and the lack of research by contrast,(20) it is important to  
52  
53 ensure that the principle of inclusiveness is applied so that interventions are designed for  
54  
55 those with disabilities. This review aims to systematically review physical activity  
56  
57 interventions for those with vision impairment and to assess the effectiveness of the  
58  
59  
60

1  
2  
3  
4  
5  
6  
7  
8  
9  
10  
11  
12  
13  
14  
15  
16  
17  
18  
19  
20  
21  
22  
23  
24  
25  
26  
27  
28  
29  
30  
31  
32  
33  
34  
35  
36  
37  
38  
39  
40  
41  
42  
43  
44  
45  
46  
47  
48  
49  
50  
51  
52  
53  
54  
55  
56  
57  
58  
59  
60

interventions in improving health-related (physical and mental) outcomes and issues  
encountered.

For peer review only

## METHODS

### Eligible studies

This systematic review included peer-reviewed articles reporting on physical activity interventions in visually impaired individuals. The research questions, search strategy and inclusion/exclusion criteria were determined prior to commencing the search and the review was registered on the International Prospective Register of Systematic Reviews (PROSPERO CRD42018103638; record available from [https://www.crd.york.ac.uk/prospero/display\\_record.php?RecordID=103638](https://www.crd.york.ac.uk/prospero/display_record.php?RecordID=103638)). Although the initial research plan was to review studies across all age categories, the population of interest was restricted to adults (aged 18 years and over) following the initial search as a recent systematic review among children and adolescents was identified.<sup>(21)</sup> We included experimental studies focusing on a physical activity intervention or those examining interventions with a clear physical activity component. Controls included individuals not exposed to the intervention or the baseline measurements of participants prior to commencement of the intervention (pre-post study design). Both randomised control trials and non-randomised studies of interventions, including pre-post studies without a comparison group, were included to provide a more complete picture of all the studies in the literature, given the small number expected. Observational studies, reviews, case reports, abstracts, commentaries or other opinion pieces were excluded. No limit on publication date or language of publication was set to ensure broad coverage of the literature. Outcome measures included a range of physical measurements, such as body fat percentage, blood pressure, body mass, waist circumference; physical activity/fitness measures such as flexibility, daily step count, balance and muscle strength and endurance; and wellbeing measures including social and emotional wellbeing and depression.

## Sources and Search Strategy

We searched Medline (1946 – August 2018), EMBASE (1947 – August 2018), The Cochrane Library (1993 – August 2018), Cumulative Index to Nursing and Allied Health Literature (CINAHL) (1982 – August 2018), SPORTDiscus (1892 – August 2018), and the Physiotherapy Evidence Database (PEDro) (1929 – August 2018). Back references of all papers included in the review were also searched to identify additional articles. Search terms included those related to blindness and visual impairment (e.g. vision disorders, visually impaired person, glaucoma) and physical activity (e.g. exercise, sports, muscle strength, gait, dancing, and rehabilitation). A targeted search of the Journal of Visual Impairment and Blindness was conducted due to indexing issues discovered during the back-reference search. One article was discovered through this additional search. The final search strategy for Medline is outlined in Supplementary Material 1. This search strategy was adapted for use with the other bibliographic databases in combination with database-specific filters. An initial screen of all abstracts was conducted to identify potentially relevant studies (MA and JS). These studies were then simultaneously and independently reviewed by two reviewers (DD and PASA) to determine eligibility for inclusion in this review, with a third reviewer (DM) enlisted in the case of disagreement.

## Data collection

Data were extracted from the eligible papers by JS and summarised into an Excel spreadsheet with the following headings: Author, Year of Publication, Population (including age) and Setting, Visual Conditions, Exclusion Criteria, Study Design, Control Group, Theory (behind the intervention), Type of Physical Activity Intervention, Dose of Intervention (times per week, duration), Delivery (who delivered the intervention), Outcomes, Process Evaluation (e.g. participation, adherence, drop out, feedback),



1  
2 Results, Other Notes and Funding Sources. We further condensed the extracted data  
3  
4 under the headings seen in Tables 1 and 2. Data extraction was checked by KE with  
5  
6 agreement achieved on all studies through discussion. Data for one paper written in Farsi  
7  
8 was extracted by a collaborator fluent in Farsi.  
9

## 10 11 12 13 14 15 **Analysis**

16  
17  
18 The main characteristics and findings of each study were summarised and tabulated to  
19  
20 provide an overview of the literature to date in this area. Where measures were common  
21  
22 across RCT studies, a meta-analysis was conducted, using R Foundation for Statistical  
23  
24 Computing, version 3.6.0 to estimate the standardised mean difference (SMD) and 95%  
25  
26 confidence interval to assess the effectiveness of the interventions. The  $I^2$  was calculated  
27  
28 as a measure of heterogeneity between studies. This review was conducted in line with  
29  
30 the Preferred Reporting Items for Systematic Reviews and Meta-Analysis (PRISMA)(22)  
31  
32 and A Measurement Tool to Assess Systematic Reviews (AMSTAR2) guidelines (23)  
33  
34 (Supplementary 2 and 3). Risk of bias assessment was performed by JS and PASA, using  
35  
36 the Cochrane Collaboration's tool for assessing risk of bias. This tool was used to rate  
37  
38 each randomised controlled trial (RCT) with a low, high or uncertain risk of bias across six  
39  
40 criteria including randomisation, allocation concealment, performance bias, ascertainment  
41  
42 bias, incomplete outcome data and selective reporting.(24) For non-randomised studies  
43  
44 we considered the risk of bias due to incomplete data and selective reporting.  
45  
46  
47  
48  
49  
50  
51  
52  
53

## 54 **Patient and Public Involvement**

55  
56  
57 Neither patients nor the public were involved in the design, conduct, reporting or  
58  
59 dissemination of this research.  
60

## RESULTS

### Study selection

A total of 10,112 records were returned, with 6,517 unique record titles and abstracts screened for possible inclusion. Of these, 56 full texts were obtained and reviewed, with 18 papers (from 17 studies) meeting the inclusion criteria (Figure 1). Primary reasons for exclusion were: the studies were conducted in children under the age of 18 (n=19), were not reporting results of a trial of an intervention (e.g. protocol papers) (n=14) and did not include physical activity as a key component of the intervention (n=5). The studies were predominately funded by Government and/or Research Grants (n=9), with funding sources not specified by six studies. One intervention which examined the impact of the Alexander technique (25, 26) was funded by private sources including The Australian Society of Teachers of the Alexander Technique and the FM Alexander Trust (UK), in addition to government and research funding. One intervention was not sponsored.

### Study characteristics

The characteristics of the studies are shown in Supplementary Material 4 and summarised in Table 1. Most of the papers (n=14, 78%) were published in the ten years preceding the date of the search (2008-2018). Nine employed a randomised control trial study design, with the remaining eight studies using a pre-post format. Seven interventions were conducted in the United States with the remaining studies conducted in Europe (n= 5), Asia (n=3), and Oceania (n= 2). Except for one study that was published in Farsi, all studies were published in English.

**Table 1. Summary of included interventions**

|                                  | Falls Prevention and Balance Interventions |                    |                   |               |                        |                |                 | Other Intervention Types |             |                                   |              |                                |                |               |                   |                | Mixed                        |
|----------------------------------|--------------------------------------------|--------------------|-------------------|---------------|------------------------|----------------|-----------------|--------------------------|-------------|-----------------------------------|--------------|--------------------------------|----------------|---------------|-------------------|----------------|------------------------------|
|                                  | Campbell (2005)                            | Cheung (2008)      | Kingston (2018)   | Kovács (2012) | Surakka (2008)         | Surakka (2011) | Waterman (2016) | Ackley-Holbrook (2016)   | Chen (2012) | Gleeson (2015, 2017)              | Jeter (2012) | Jeter (2015)                   | Larsson (2006) | Miszko (2004) | Ponchillia (1992) | Salari (2013)  | Hackney (2015)               |
| <b>Study Design</b>              | RCT                                        | RCT                | PP                | RCT           | PP                     | RCT            | RCT             | PP                       | RCT         | RCT                               | PP           | RCT                            | PP             | PP            | PP                | PP             | RCT                          |
| <b>Sample size</b>               | 391                                        | 50                 | 24                | 41            | 27                     | 29             | 49              | 21                       | 40          | 120                               | 10           | 21                             | 8              | 10            | 3                 | 30             | 32                           |
| <b>Mean age (yrs)</b>            | 84                                         | 83                 | 80                | 69            | 54                     | 56             | 81              | 48                       | 86          | 75                                | 46           | 55                             | 52             | 53            | 31                | 22             | 79                           |
| <b>Basis of PA Intervention</b>  | Otago                                      | Balance + Strength | Matter Of Balance | Otago         | Balance                | Balance        | Otago           | Walking                  | Tai Chi     | Alexander Technique               | Yoga         | Yoga                           | Dance          | Tai Chi       | Aerobics          | Core stability | Exp.= Dance Ctrl= FallProof  |
| <b>Delivery mode<sup>a</sup></b> | Self-directed                              | Group              | Group             | Group         | Group or mixed         | Group          | Self-directed   | Self-directed            | Group       | Group                             | Mixed        | Mixed                          | Group          | Mixed         | Group             | -              | Group                        |
| <b>Duration</b>                  | 1yr                                        | 12wks              | 4wks              | 6mths         | 5-6wks                 | 5-6wks         | 6mths           | 8wks                     | 16wks       | 12wks                             | 8wks         | 8wks                           | 8wks           | 8wks          | 7wks              | 8wks           | 10-12wks                     |
| <b>Compliance</b>                | 18%                                        | 100%               | -                 | 95%           | Mean # sessions = 13.5 | -              | Equivocal       | 94%                      | -           | 100%                              | -            | 82% sessions 90% home practice | -              | -             | -                 | -              | 25/32 completed all sessions |
| <b>Retention</b>                 | 92%                                        | 100%               | 100%              | 100%          | 89%                    | 100%           | 88%             | 81%                      | 62%         | 93%                               | 70%          | 81%                            | 88%            | 80%           | 100%              | -              | 78%                          |
| <b>Adverse Outcomes</b>          | N = 1 moderate injury                      | None               | -                 | N = 22 falls  | -                      | -              | None            | N = 2 falls              | -           | N = 2 deaths, N=1 hospitalisation | -            | None                           | -              | None          | -                 | -              | -                            |
| <b>Results<sup>b</sup></b>       |                                            |                    |                   |               |                        |                |                 |                          |             |                                   |              |                                |                |               |                   |                |                              |
| <b>Falls and Balance</b>         | Mixed                                      | +                  | NT                | 0             | DA                     | NT             | 0               | NT                       | +           | +(postural sway)                  | DA           | +                              | ~+             | DA            | NT                | +              | +                            |
| <b>Functional Capacity</b>       | NT                                         | +                  | DA                | +             | NT                     | +              | NT              | +                        | +           | 0                                 | NT           | +                              | ~+             | DA            | ~+                | NT             | +                            |
| <b>Psych. well-being</b>         | NT                                         | NT                 | NT                | NT            | DA                     | NT             | 0               | NT                       | NT          | 0                                 | DA           | NT                             | NT             | DA            | NT                | NT             | 0                            |

<sup>a</sup> Mixed = self-directed sessions in combination with regular group classes or face to face session; Group = group class-based only.

<sup>b</sup> + = statistically significant result in favor of intervention, 0 = no statistically significant change, ~+ = analysis at individual level showing significant change, DA = descriptive analysis only, NT = not tested.

'-' = Not reported

Abbreviations: PP - pre-post; RCT – randomised controlled trial

## Participants

There was a total of 906 participants across the 17 interventions, with a mean of 53 and a median of 29 per study. The number of participants per study ranged from three to 391 with 14 studies with 50 or fewer participants. The mean age across all studies was 62 years, with only two (27, 28) examining populations aged younger than 35 years.

Approximately two-thirds (70%) of participants were female, with three studies only including women.(27, 29, 30) Participants were recruited through a combination of local advocacy groups, community center listings, and by word-of-mouth in four studies. In eight studies participants were recruited from medical institutions such as hospitals, clinics, private practices and rehabilitation services. In two studies participants were recruited from residential care homes and one recruited participants from a university (recruitment method unknown in two studies).

Visual impairment was defined in several ways with varying levels of detail. Most studies provided cut-points of visual acuity (e.g. 6/24 or worse), while some linked these cut points to those designated by the World Health Organization International Classification of Diseases Codes.(31, 32) Visual conditions identified included age-related conditions such as macular degeneration and cataracts, diabetic retinopathy, glaucoma, corneal scars, and congenital blindness.

## Intervention types

Seven studies employed specific falls prevention and/or balance-based physical activity interventions. Of these, three used the Otago exercise program,(30, 33, 34) three used general physical activity training programs aiming to improve balance,(29, 35, 36) and one used the Matter of Balance program.(37, 38) The remaining interventions were based on

1  
2 other forms of physical activity including walking (n=1),(31) Tai Chi (n=2),(39, 40)  
3  
4 Alexander Technique (n=1),(25, 26) Yoga (n=2),(41, 42) dance (n=1),(43) aerobics (n=1)  
5  
6 (27) and core stability training (n=1).(28) One study utilised a falls prevention program  
7  
8 (FallProof) as a control, comparing to a dance-based intervention program.(32) The  
9  
10 interventions were predominately delivered in a group based, face-to-face format with only  
11  
12 three being chiefly self-directed with periodic contact from investigators.(31, 33, 34) The  
13  
14 interventions ran for an average of 13 weeks (range of four weeks – one year) with three-  
15  
16 quarters (n = 13/17, 76%) having a duration of 4 -12 weeks.  
17  
18  
19  
20  
21  
22  
23

## 24 Objectives

25  
26  
27 In general, each intervention aimed to assess the impact of a physical activity program on  
28  
29 falls risk or balance, physical health, and/or mental health. Four interventions aimed to  
30  
31 compare the physical activity intervention to another program such as a home safety  
32  
33 program,(33, 34) fall prevention program,(32) or osteoporosis program.(30) Eight  
34  
35 interventions aimed to cater specifically for “older” or “elderly” individuals. One study  
36  
37 focused on female athletes.(28) Two studies examined the cost-effectiveness of the  
38  
39 intervention.(33, 34)  
40  
41  
42  
43  
44  
45  
46  
47

## 48 Outcome measures

49  
50 As summarised in Table 2, the most common outcomes were measures of balance,  
51  
52 reported in 65% of the interventions (Berg Balance Scale [BBS], n = 4; other measures  
53  
54 e.g. sensory organisation test [SOT] and one legged stance [OLS], n = 9). Six studies  
55  
56 (35%) examined the impact of the intervention of an aspect of mental well-being such as  
57  
58 anxiety, depression, or quality of life. Measures of mobility were used in five studies (29%),  
59  
60

1  
2 most commonly the timed up and go (TUG) test (n=5). Other outcome measures included  
3  
4 number of falls (n=4), muscle strength (n=3), flexibility (n=3), gait (n=3), anthropometric  
5  
6 measures (n=3), the chair stand test (n=2) and sleep (n=1).  
7  
8  
9  
10  
11  
12  
13  
14  
15  
16  
17  
18  
19  
20  
21  
22  
23  
24  
25  
26  
27  
28  
29  
30  
31  
32  
33  
34  
35  
36  
37  
38  
39  
40  
41  
42  
43  
44  
45  
46  
47  
48  
49  
50  
51  
52  
53  
54  
55  
56  
57  
58  
59  
60

For peer review only

Table 2 Summary of outcome measures

|                     | OUTCOME                               | Ackley-Holbrook (2016) | Campbell (2005) | Chen (2012) | Cheung (2008) | Gleeson (2015, 2017) | Hackney (2015) | Jeter (2012) | Jeter (2015) | Kingston (2018) | Kovács (2012) | Larsson (2006) | Miszko (2004) | Ponchillia (1992) | Salari (2013) | Surakka (2008) | Surakka (2011) | Waterman (2016) |
|---------------------|---------------------------------------|------------------------|-----------------|-------------|---------------|----------------------|----------------|--------------|--------------|-----------------|---------------|----------------|---------------|-------------------|---------------|----------------|----------------|-----------------|
| Balance             | Number of Falls                       |                        | X               |             |               | X                    |                |              |              |                 | X             |                |               |                   |               |                |                | X               |
|                     | Berg Balance Scale                    |                        |                 |             | X             |                      | X              |              |              |                 | X             |                | X             |                   |               |                |                |                 |
|                     | Other Balance <sup>a</sup>            |                        |                 | X           |               | X                    | X              | X            | X            |                 |               | X              | X             |                   | X             | X              |                |                 |
| Functional Capacity | Timed Up and Go                       |                        |                 |             | X             |                      | X              |              |              | X               | X             | X              |               |                   |               |                |                |                 |
|                     | Other Mobility <sup>b</sup>           |                        |                 |             |               |                      |                |              |              | X               | X             |                |               |                   |               |                |                |                 |
|                     | Chair Stand Test                      |                        |                 |             | X             | X                    |                |              |              |                 |               |                |               |                   |               |                |                |                 |
|                     | Other Fitness <sup>c</sup>            | X                      |                 |             |               | X                    | X              |              |              |                 |               | X              |               | X                 |               |                |                |                 |
|                     | Muscle strength                       |                        |                 | X           |               |                      |                |              |              |                 |               |                | X             | X                 |               |                |                |                 |
|                     | Flexibility                           |                        |                 |             |               |                      |                |              | X            |                 |               |                |               | X                 |               |                | X              |                 |
| Other               | Psychological well-being <sup>d</sup> |                        |                 |             |               | X                    | X              | X            |              |                 |               |                | X             |                   |               | X              |                | X               |

<sup>a</sup> Including measures of postural sway and stability (Sensory Organisation Test, One Legged Stance, Mean Stride Length, Functional Reach).

<sup>b</sup> Including Performance-oriented mobility assessment and Activity Index

<sup>c</sup> Including six-minute walk test, step count, gait measures.

<sup>d</sup> Including measures of quality of life, anxiety, depression, emotional wellbeing.

## Synthesis of Results

Falls or balance related outcomes were measured in 13 studies, with statistically significant results in favor of the intervention observed in seven studies (54%). Although more falls were recorded in the intervention group in the Campbell et al. (2005) study, further analysis showed fewer falls with increasing adherence to the exercise program ( $p=0.001$ ). Measures of functional capacity were used in 12 studies, with statistically significant results in favor of the intervention observed in nine studies (75%). Psychological well-being was measured in only six studies and no significant results were observed in these outcomes. No paper reported negative results that would suggest the intervention was detrimental to any aspect of health measured. Drop out reasons across all studies included medical problems ( $n=10$ ), lack of transport or travel time ( $n=7$ ), dissatisfaction with program ( $n=1$ ), time ( $n=2$ ), other ( $n=3$ ).

## Effectiveness of Interventions on PA outcomes

A meta-analysis was conducted where outcome measures were common across RCT interventions, namely for the Timed Up and Go (TUG), Chair Sit Test (CST) and Berg Balance Scale (BBS). Only four studies were able to be included in the meta-analysis and the results are shown in Figure 2. In all instances, the combined results crossed the line of null effect (mean difference = 0) indicating non-significant effects of the interventions on each of the outcome measures. In addition, the wide 95% confidence intervals indicate imprecision across the studies, potentially due to small sample sizes. Heterogeneity was low for the TUG and CST ( $I^2 = 0\%$  and  $22\%$ , respectively) suggesting consistent null findings, however, it was high for the BBS ( $I^2 = 53\%$ ).



## Study Quality – Risk of Bias Assessment

The results of the Risk of Bias assessment can be found in Table 3. In general, the randomised controlled trials showed a low risk of bias in randomisation (n=6/9 'low') and allocation concealment (n=6/9 'low'). Risk of attrition bias due to incomplete data was also low in the majority of all studies (n=11/17). Of note, all but one study was categorised as 'unclear' or 'high' risk of reporting bias due to selective outcome reporting. In all pre-post studies it was not possible to determine if all outcomes were reported due to the lack of study protocol or registrations. Of the nine randomised controlled trials, study protocols were unavailable for five, two were missing a priori secondary outcomes, one followed the study protocol, and one deviated from the study protocol.

**Table 3. Risk of bias assessment for randomised control trials (RCTs) and pre-post studies**

| Source                                   | Risk of bias (High, low, unclear) |             |                  |                    |                         |                     |
|------------------------------------------|-----------------------------------|-------------|------------------|--------------------|-------------------------|---------------------|
|                                          | Randomisation sequence allocation | Concealment | Performance bias | Ascertainment bias | Incomplete outcome data | Selective reporting |
| <b>RCTs</b>                              |                                   |             |                  |                    |                         |                     |
| Campbell et al (2005)                    | LOW                               | LOW         | UNCLEAR          | UNCLEAR            | LOW                     | UNCLEAR             |
| Chen et al (2012)                        | UNCLEAR                           | UNCLEAR     | LOW              | LOW                | LOW                     | UNCLEAR             |
| Cheung et al., (2008)                    | LOW                               | LOW         | LOW              | LOW                | LOW                     | UNCLEAR             |
| Gleeson et al. (2015, 2017)              | LOW                               | LOW         | UNCLEAR          | LOW                | LOW                     | UNCLEAR             |
| Hackney et al. (2015)                    | HIGH                              | HIGH        | HIGH             | UNCLEAR            | LOW                     | UNCLEAR             |
| Jeter et al (2015)                       | LOW                               | LOW         | HIGH             | LOW                | LOW                     | HIGH                |
| Kovacs et al (2012)                      | LOW                               | LOW         | UNCLEAR          | LOW                | LOW                     | UNCLEAR             |
| Surakka et al (2011)                     | UNCLEAR                           | UNCLEAR     | HIGH             | HIGH               | UNCLEAR                 | UNCLEAR             |
| Waterman et al (2016)                    | LOW                               | LOW         | HIGH             | LOW                | LOW                     | LOW                 |
| <b>Pre-post with no comparison group</b> |                                   |             |                  |                    |                         |                     |
| Ackley-Holbrook et al (2016)             | ---                               | ---         | ---              | ---                | LOW                     | UNCLEAR             |
| Jeter (2012)                             | ---                               | ---         | ---              | ---                | HIGH                    | UNCLEAR             |
| Kingston (2018)                          | ---                               | ---         | ---              | ---                | UNCLEAR                 | UNCLEAR             |
| Larsson (2006)                           | ---                               | ---         | ---              | ---                | LOW                     | UNCLEAR             |
| Miszko (2004)                            | ---                               | ---         | ---              | ---                | UNCLEAR                 | UNCLEAR             |
| Ponchillia (1992)                        | ---                               | ---         | ---              | ---                | LOW                     | UNCLEAR             |
| Salari (2013)                            | ---                               | ---         | ---              | ---                | UNCLEAR                 | UNCLEAR             |
| Surakka (2008)                           | ---                               | ---         | ---              | ---                | UNCLEAR                 | UNCLEAR             |

--- Not applicable

## DISCUSSION

This systematic review sought to summarise the effects of physical activity interventions in adults who are visually impaired. Based on the studies identified, there is evidence that physical activity interventions are beneficial to adults with visual impairment, with positive health benefits observed particularly in outcomes related to functional capacity. However, when focusing on RCTs, where the risk of bias is lower, and examining combined results in a meta-analysis, the evidence for intervention effectiveness is less clear.

This review identified seventeen intervention studies, which represents a considerably small evidence base, particularly in contrast to the size of the problems related to physical inactivity, health conditions and challenges faced by many people with visual impairment. Several characteristics of existing studies have also limited the internal and external validity. First, most studies included very small sample sizes with four presenting descriptive analysis only (did not report inferential statistics) and two reporting results at an individual, rather than group level. Second, there was a substantial imbalance in both gender (70% female participants) and age with all but two studies focused on individuals aged older than 45 years. However, overrepresentation of female participants is common in health interventions and people aged 50 years and older represent 65% of all visually impaired persons worldwide (and 82% of blind persons).(44) Third, more than three-quarters of the studies ran for 12 weeks or less, limiting the ability to assess maintenance of changes observed and effects on outcomes that may take time to change. For example, of the six studies assessing psychological well-being and mental health outcomes, none reported statistically significant improvements. However, promising results were observed in measures of functional capacity, such as mobility and fitness, and balance, even in a relatively short time period of 5-6 weeks.(36) To address these issues future interventions should, where possible, employ an

1  
2 RCT study design with a priori calculation of participants needed to ensure the study is  
3  
4 powered for more robust statistical analysis. If feasible, a longer duration would also be of  
5  
6 benefit, particularly in establishing the impact of the interventions on mental health outcomes.  
7  
8 Also, a targeted approach to include males and those aged 18-45 years may be appropriate  
9  
10 to address the underrepresentation of these demographics in the current literature.  
11  
12

13  
14 A wide range of physical activities were used by the intervention studies, most of which  
15  
16 focused on low-intensity physical activities, such as yoga and Tai Chi, with a strong emphasis  
17  
18 on improving balance and stability. Only one study incorporated higher intensity activity in the  
19  
20 form of aerobics with “many high-impact (bouncing and jumping) ... movements”.(27)  
21  
22 However, this study was also the smallest with only three participants, so it is hard to  
23  
24 determine its effects. Although the benefits of yoga, Tai Chi and other low-intensity activities  
25  
26 have been documented,(45-47) moderate and vigorous physical activity have further health  
27  
28 benefits and are generally the primary focus of global physical activity guidelines.(5) The  
29  
30 current CDC guidelines recommend a minimum of 150 minutes per week of moderate activity  
31  
32 per week (or 75 minutes of vigorous activity) (5) with the evidence on light intensity physical  
33  
34 activity not yet conclusive for informing guidelines.(1) Although these guidelines highlight a  
35  
36 dose-response relationship whereby more health benefits are gained with an increase in  
37  
38 moderate intensity physical activity undertaken, even small increases in physiological  
39  
40 capacity / physical activity provide significant reduction in mortality risk.(48, 49) This suggests  
41  
42 that future physical activity interventions among those with visual impairment should consider  
43  
44 incorporating some physical activity at a moderate intensity or higher, even if only in small  
45  
46 doses in older individuals. Although on the surface visual impairment may appear to be a  
47  
48 barrier to undertaking moderate or vigorous physical activity, the existence of numerous  
49  
50 sports for visually impaired athletes at Paralympic level would suggest otherwise.(50) Even  
51  
52  
53  
54  
55  
56  
57  
58  
59  
60

1  
2 though few individuals reach this height of athletic ability, it is evident that visually impaired  
3  
4 individuals can perform higher intensity activities, evidenced by the feasibility of physical  
5  
6 activity trials with walking and aerobics as the intervention.(27, 31) Therefore, development of  
7  
8 interventions for moderate and / or vigorous physical activity could form a focus in future  
9  
10 work. Moreover, given the increased risk of poorer physical and mental health for those who  
11  
12 are visually impaired,(13, 51) it is important to ensure they are given opportunities to  
13  
14 undertake physical activity at higher intensities in order to garner the further health benefits.  
15  
16

17  
18 In terms of delivery mode, studies were predominately group-based, with nine of sixteen  
19  
20 (delivery mode unknown in one study) purely delivered in a face-to-face manner, and a further  
21  
22 four involving group classes with additional self-directed practice at home. The remaining  
23  
24 three studies were of a more self-directed nature with varying levels of investigator  
25  
26 involvement including five home visits throughout the year-long study,(33) five home visits  
27  
28 (from occupational therapist or peer mentor) and two phone calls over the six month  
29  
30 duration,(34) and a single orientation session followed by self-directed activity.(31) Further  
31  
32 intervention studies could compare the effectiveness of group-based and self-directed trials to  
33  
34 determine the possibility of reducing investigator burden in delivery by increasing self-directed  
35  
36 options where possible. This would have the added benefit of incorporating capacity building  
37  
38 into the intervention and enabling participants to continue in their new habits post-  
39  
40 intervention. Alternatively, the use of already existing programs such as regular community  
41  
42 dance classes could be examined as a means of increasing the likelihood of maintaining  
43  
44 changes to physical activity behaviors following the intervention. To our knowledge, none of  
45  
46 the group-based interventions identified allowed participants to continue in the physical  
47  
48 activity following the study as they were all conducted for research purposes only. However,  
49  
50  
51  
52  
53  
54  
55  
56  
57  
58  
59  
60

1  
2 given the habitual nature physical activity, it is possible highly motivated individuals may have  
3  
4 continued to practice in their own homes following instruction during the intervention.  
5  
6  
7  
8  
9

## 10 Strengths and limitations

11  
12  
13 The strengths of this systematic review include incorporating both qualitative and quantitative  
14 evidence synthesis, following AMSTAR2 and PRISMA guidelines, and not restricting literature  
15 search by publication language and dates. Limitations relate to the studies identified, rather  
16 than the review process itself. The studies identified were generally small with diverse study  
17 designs and outcomes measured. This made it challenging to determine the effectiveness of  
18 the interventions and to identify the aspects that should be retained in subsequent studies.  
19  
20 Most studies lasted for a short period of time without intended examination for longer-term  
21 maintenance. Finally, the quality assessment showed a high risk of bias across the papers in  
22 several categories.  
23  
24  
25  
26  
27  
28  
29  
30  
31  
32  
33  
34  
35  
36  
37

## 38 CONCLUSION

39  
40  
41 Given the higher risk of developing non-communicable diseases for those with visual  
42 impairment, it is imperative that sufficient physical activity is undertaken by these individuals  
43 to ensure that they benefit from the positive health outcomes. This systematic review  
44 illustrates that physical activity interventions in individuals with visual impairment can have  
45 beneficial results, particularly in physical measures such as mobility and balance. However,  
46 when performing a meta-analysis of RCTs, the evidence for effectiveness is less clear. More  
47 high quality research needs to be conducted in larger groups, with a focus on specific age  
48  
49  
50  
51  
52  
53  
54  
55  
56  
57  
58  
59  
60

1 groups and over longer periods of time to enable the optimisation of further interventions.

2  
3  
4 Additionally, future studies need to incorporate interventions that equip the participants with  
5  
6 skills and confidence to sustain their new physical activity behaviors post-intervention. Finally,  
7  
8 more research is required into the feasibility of interventions that address the need for  
9  
10 moderate and vigorous physical activity, which unlock even more health benefits compared to  
11  
12 the low intensity activities reported in this systematic review.  
13  
14  
15  
16  
17  
18  
19  
20  
21  
22  
23  
24  
25  
26  
27  
28  
29  
30  
31  
32  
33  
34  
35  
36  
37  
38  
39  
40  
41  
42  
43  
44  
45  
46  
47  
48  
49  
50  
51  
52  
53  
54  
55  
56  
57  
58  
59  
60

For peer review only

## **AUTHOR CONTRIBUTIONS**

JS, DM, MA, KME, and DD were involved in study design. JS and MA performed the systematic search, JS, DM, PASA, KME and DD made significant contributions to the analysis and/or interpretation of the data. JS, DM, PASA, MA, KME and DD all contributed to drafting and revising the work.

## **ACKNOWLEDGEMENTS**

The authors wish to thank Dr Javad Koohsari, from Waseda University, Japan, for helping with translation and data extraction from a study published in Farsi.

## **FUNDING**

The work was supported by a Sydney Research Accelerator (SOAR) prize awarded to Ding. Ding is funded by a National Heart Foundation Future Leader Fellowship.

## **COMPETING INTERESTS**

None declared.

## **DATA AVAILABILITY STATEMENT**

All data relevant to the study are included in the article or uploaded as supplementary information.



## REFERENCES

1. 2018 Physical Activity Guidelines Advisory Committee. 2018 Physical Activity Guidelines Advisory Committee Scientific Report Washington, DC2018 [Available from: [https://health.gov/paguidelines/second-edition/report/pdf/pag\\_advisory\\_committee\\_report.pdf](https://health.gov/paguidelines/second-edition/report/pdf/pag_advisory_committee_report.pdf), Accessed: April 2019].
2. Lee IM, Shiroma EJ, Lobelo F, et al. Effect of physical inactivity on major non-communicable diseases worldwide: an analysis of burden of disease and life expectancy. *Lancet*. 2012;380(9838):219-29.
3. Chekroud SR, Gueorguieva R, Zheutlin AB, et al. Association between physical exercise and mental health in 1.2 million individuals in the USA between 2011 and 2015: a cross-sectional study. *Lancet Psychiatry*. 2018;5(9):739-46.
4. Penedo FJ, Dahn JR. Exercise and well-being: a review of mental and physical health benefits associated with physical activity. *Current opinion in psychiatry*. 2005;18(2):189-93.
5. U.S. Department of Health and Human Services. Physical Activity Guidelines for Americans, 2nd Edition. Washington, DC: U. S. Department of Health and Human Services; 2018 [Available from: [https://health.gov/paguidelines/second-edition/pdf/Physical\\_Activity\\_Guidelines\\_2nd\\_edition.pdf](https://health.gov/paguidelines/second-edition/pdf/Physical_Activity_Guidelines_2nd_edition.pdf), Accessed: April 2019].
6. Guthold R, Stevens GA, Riley LM, et al. Worldwide trends in insufficient physical activity from 2001 to 2016: a pooled analysis of 358 population-based surveys with 1.9 million participants. *The Lancet Global health*. 2018;6(10):e1077-e86.
7. U.S. Department of Health and Human Services. Increasing Physical Activity Among Adults with Disabilities 2018 [Available from: <https://www.cdc.gov/ncbddd/disabilityandhealth/pa.html>, Accessed: April 2019].
8. Okoro CA, Hollis ND, Cyrus AC, et al. Prevalence of Disabilities and Health Care Access by Disability Status and Type Among Adults - United States, 2016. *MMWR Morb Mortal Wkly Rep*. 2018;67(32):882-7.
9. World Health Organization. Blindness and Visual Impairment 2018 [Available from: <https://www.who.int/news-room/fact-sheets/detail/blindness-and-visual-impairment>, Accessed: March 2019].
10. Langelaan M, de Boer MR, van Nispen RM, et al. Impact of visual impairment on quality of life: a comparison with quality of life in the general population and with other chronic conditions. *Ophthalmic Epidemiol*. 2007;14(3):119-26.
11. Vu HT, Keeffe JE, McCarty CA, et al. Impact of unilateral and bilateral vision loss on quality of life. *The British journal of ophthalmology*. 2005;89(3):360-3.
12. Zhang X, Bullard KM, Cotch MF, et al. Association between depression and functional vision loss in persons 20 years of age or older in the United States, NHANES 2005-2008. *JAMA ophthalmology*. 2013;131(5):573-81.
13. McCarty CA, Nanjan MB, Taylor HR. Vision impairment predicts 5 year mortality. *The British journal of ophthalmology*. 2001;85(3):322-6.
14. Taylor HR, Katala S, Munoz B, et al. Increase in mortality associated with blindness in rural Africa. *Bulletin of the World Health Organization*. 1991;69(3):335-8.
15. Ramrattan RS, Wolfs RC, Panda-Jonas S, et al. Prevalence and causes of visual field loss in the elderly and associations with impairment in daily functioning: the Rotterdam Study. *Arch Ophthalmol*. 2001;119(12):1788-94.
16. Nguyen AM, Arora KS, Swenor BK, et al. Physical activity restriction in age-related eye disease: a cross-sectional study exploring fear of falling as a potential mediator. *BMC geriatrics*. 2015;15:64.
17. van Landingham SW, Willis JR, Vitale S, et al. Visual field loss and accelerometer-measured physical activity in the United States. *Ophthalmology*. 2012;119(12):2486-92.
18. Willis JR, Jefferys JL, Vitale S, et al. Visual impairment, uncorrected refractive error, and accelerometer-defined physical activity in the United States. *Arch Ophthalmol*. 2012;130(3):329-35.
19. Kirchner CE, Gerber EG, Smith BC. Designed to deter. Community barriers to physical activity for people with visual or motor impairments. *Am J Prev Med*. 2008;34(4):349-52.

20. Krahn GL, Walker DK, Correa-De-Araujo R. Persons with disabilities as an unrecognized health disparity population. *Am J Public Health*. 2015;105 Suppl 2:S198-206.
21. Furtado OL, Allums-Featherston K, Lieberman LJ, et al. Physical activity interventions for children and youth with visual impairments. *Adapt Phys Activ Q*. 2015;32(2):156-76.
22. Moher D, Liberati A, Tetzlaff J, et al. Preferred reporting items for systematic reviews and meta-analyses: the PRISMA statement. 2009.
23. Shea BJ, Reeves BC, Wells G, et al. AMSTAR 2: a critical appraisal tool for systematic reviews that include randomised or non-randomised studies of healthcare interventions, or both. *BMJ*. 2017;358:j4008.
24. Higgins JPT, Green S, editors. *Cochrane Handbook for Systematic Reviews of Interventions*. : The Cochrane Collaboration. Available from [www.handbook.cochrane.org](http://www.handbook.cochrane.org). Accessed: May 2019
25. Gleeson M, Sherrington C, Lo S, et al. Impact of the Alexander technique on well-being: a randomised controlled trial involving older adults with visual impairment. *Clin Exp Optom*. 2017;100(6):633-41.
26. Gleeson M, Sherrington C, Lo S, et al. Can the Alexander Technique improve balance and mobility in older adults with visual impairments? A randomized controlled trial. *Clin Rehabil*. 2015;29(3):244-60.
27. Ponchillia SV, Powell LL, Felski KA, et al. The Effectiveness of Aerobic Exercise Instruction for Totally Blind Women. *J Visual Impair Blin*. 1992;86(4):174-7.
28. Salari A, Sahebalzamani, M., Daneshmandi, H. The Effects of Core Stability Training Program on Balance in Blind Female Athletes. *Journal of Kerman University of Medical Sciences*. 2013;20(6):585-95.
29. Cheung KKW, Au KY, Lam WWS, et al. Effects of a structured exercise programme on functional balance in visually impaired elderly living in a residential setting. *Hong Kong Physiother J*. 2008;26:45-50.
30. Kovacs E, Toth K, Denes L, et al. Effects of exercise programs on balance in older women with age-related visual problems: A pilot study. *Arch Gerontol Geriatr*. 2012;55(2):446-52.
31. Ackley-Holbrook E, Kang M, Morgan DW. Development and Evaluation of the Walk for Health Program: A Physical Activity Intervention for Adults with Visual Impairments. *J Visual Impair Blin*. 2016;110(2):103-14.
32. Hackney ME, Hall CD, Echt KV, et al. Multimodal Exercise Benefits Mobility in Older Adults With Visual Impairment: A Preliminary Study. *J Aging Phys Act*. 2015;23(4):630-9.
33. Campbell AJ, Robertson MC, La Grow SJ, et al. Randomised controlled trial of prevention of falls in people aged > or =75 with severe visual impairment: the VIP trial. *BMJ*. 2005;331(7520):817.
34. Waterman H, Ballinger C, Brundle C, et al. A feasibility study to prevent falls in older people who are sight impaired: the VIP2UK randomised controlled trial. *Trials*. 2016;17(1):464.
35. Surakka A, Kivela T. Motivating visually impaired and deaf-blind people to perform regular physical exercises. *The British Journal of Visual Impairment*. 2008;26(3):255-68.
36. Surakka A, Kivela T. The Effect of a Physical Training Programme on Flexibility of Upper Body and Trunk in Visually Impaired and Deaf-Blind Persons. *European Journal of Adapted Physical Activity*. 2011;4(1):7-21.
37. Kingston JT. Visual Impairment and Falls: Outcomes of Two Fall Risk Assessments after a Four-Week Fall Prevention Program. *J Visual Impair Blin*. 2018;112(4):411-5.
38. Tennstedt S, Howland J, Lachman M, et al. A randomized, controlled trial of a group intervention to reduce fear of falling and associated activity restriction in older adults. *J Gerontol B Psychol Sci Soc Sci*. 1998;53(6):P384-92.
39. Chen EW, Fu AS, Chan KM, et al. The effects of Tai Chi on the balance control of elderly persons with visual impairment: a randomised clinical trial. *Age Ageing*. 2012;41(2):254-9.
40. Miszko TA, Ramsey VK, Blasch BB. Tai Chi for people with visual impairments: a pilot study. *J Visual Impair Blin*. 2004;98(1).
41. Jeter PE, Dagnelie, G., Khalsa, S.B.R., Haaz, S., Bittner, A.K. Yoga for Persons with Severe Visual Impairment: a Feasibility Study. *Alternative Medicine Studies*. 2012;2:e5.
42. Jeter PE, Haaz Moonaz S, Bittner AK, et al. Ashtanga-Based Yoga Therapy Increases the Sensory Contribution to Postural Stability in Visually-Impaired Persons at Risk for Falls as Measured by the Wii Balance Board: A Pilot Randomized Controlled Trial. *PLoS One*. 2015;10(6):e0129646.
43. Larsson L, Frandin K. Body Awareness and Dance-Based Training for Persons with Acquired Blindness-Effects on Balance and Gait Speed. *Visual Impairment Research*. 2006;8:25-40.

- 1  
2 44. Pascolini D, Mariotti SP. Global estimates of visual impairment: 2010. *The British journal of*  
3 *ophthalmology*. 2012;96(5):614-8.
- 4 45. Chu P, Gotink RA, Yeh GY, et al. The effectiveness of yoga in modifying risk factors for cardiovascular  
5 disease and metabolic syndrome: A systematic review and meta-analysis of randomized controlled trials. *Eur J*  
6 *Prev Cardiol*. 2016;23(3):291-307.
- 7 46. Ross A, Thomas S. The health benefits of yoga and exercise: a review of comparison studies. *J Altern*  
8 *Complement Med*. 2010;16(1):3-12.
- 9 47. Jahnke R, Larkey L, Rogers C, et al. A comprehensive review of health benefits of qigong and tai chi. *Am*  
10 *J Health Promot*. 2010;24(6):e1-e25.
- 11 48. Arem H, Moore SC, Patel A, et al. Leisure time physical activity and mortality: a detailed pooled analysis  
12 of the dose-response relationship. *JAMA Intern Med*. 2015;175(6):959-67.
- 13 49. Mandsager K, Harb S, Cremer P, et al. Association of Cardiorespiratory Fitness With Long-term  
14 Mortality Among Adults Undergoing Exercise Treadmill Testing. *JAMA Netw Open*. 2018;1(6):e183605.
- 15 50. Paralympics Australia. Vision Classification 2019 [Available from:  
16 <https://www.paralympic.org.au/vision-classification/>, Accessed: April 2019].
- 17 51. Court H, McLean G, Guthrie B, et al. Visual impairment is associated with physical and mental  
18 comorbidities in older adults: a cross-sectional study. *Bmc Med*. 2014;12.
- 19  
20  
21  
22  
23  
24  
25  
26  
27  
28  
29  
30  
31  
32  
33  
34  
35  
36  
37  
38  
39  
40  
41  
42  
43  
44  
45  
46  
47  
48  
49  
50  
51  
52  
53  
54  
55  
56  
57  
58  
59  
60

1  
2 **FIGURE LEGENDS**  
3

4  
5 Figure 1 PRISMA FlowChart  
6  
7

8  
9  
10  
11 Figure 2 Forest Plots from Meta Analyses. A) Timed Up and Go. B) Chair Stand Test. C) Berg  
12  
13 Balance Scale. Abbreviations; CI = confidence interval, MD = mean difference, RE = Random  
14  
15 Effects  
16  
17  
18  
19  
20  
21  
22  
23  
24  
25  
26  
27  
28  
29  
30  
31  
32  
33  
34  
35  
36  
37  
38  
39  
40  
41  
42  
43  
44  
45  
46  
47  
48  
49  
50  
51  
52  
53  
54  
55  
56  
57  
58  
59  
60

For peer review only

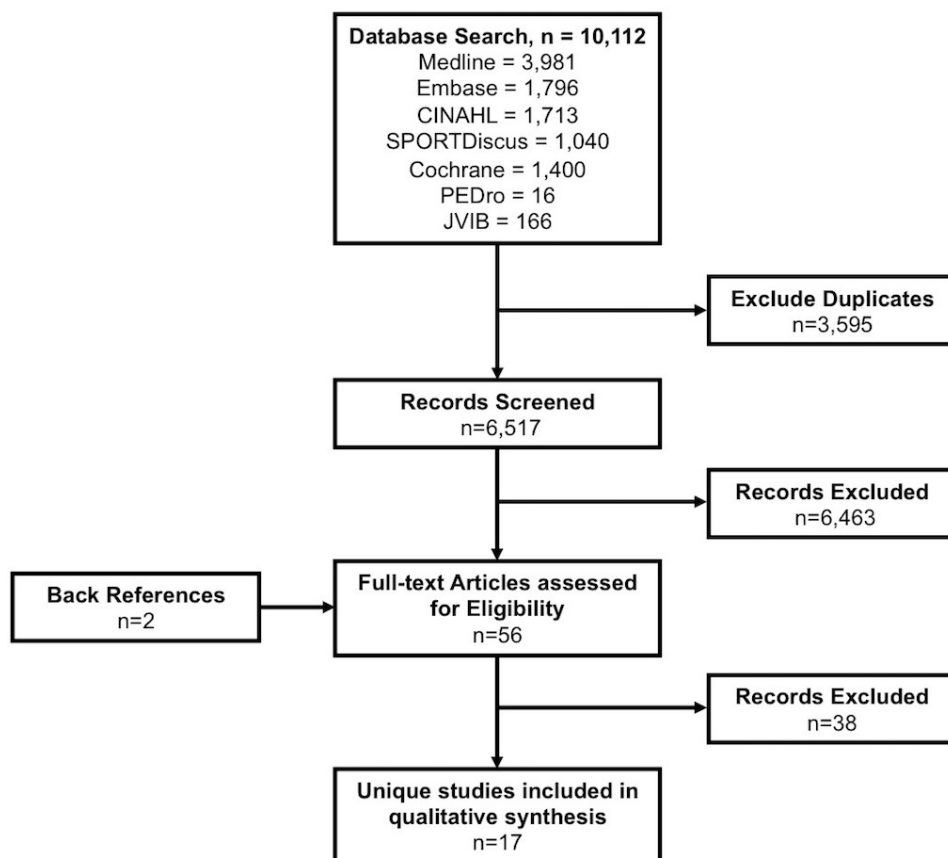

Figure 1. PRISMA FlowChart of study selection

90x90mm (300 x 300 DPI)

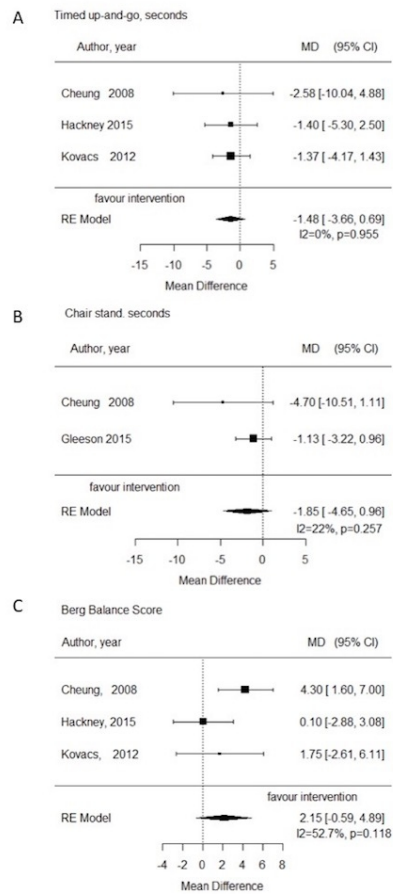

A. Timed Up and Go. B . Chair Stand Test. C. Berg Balance Scale

Figure 2. Forest plots of meta-analyses: A. Timed Up and Go. B . Chair Stand Test. C. Berg Balance Scale

90x90mm (300 x 300 DPI)

1  
2  
3  
4  
5  
6  
7  
8  
9  
10  
11  
12  
13  
14  
15  
16  
17  
18  
19  
20  
21  
22  
23  
24  
25  
26  
27  
28  
29  
30  
31  
32  
33  
34  
35  
36  
37  
38  
39  
40  
41  
42  
43  
44  
45  
46  
47  
48  
49  
50  
51  
52  
53  
54  
55  
56  
57  
58  
59  
60

### Supplementary Material 1. Search strategy for Medline

| Vision Related Terms                                                                        | Physical Activity Terms      |
|---------------------------------------------------------------------------------------------|------------------------------|
| <b>MeSH TERMS</b>                                                                           |                              |
| Vision Disorders                                                                            | Exercise                     |
| Visually Impaired Persons                                                                   | Exercise therapy             |
| Glaucoma                                                                                    | Sports                       |
| Retinal Diseases                                                                            | Tai ji                       |
| Cataract                                                                                    | Yoga                         |
|                                                                                             | Dancing                      |
|                                                                                             | Postural Balance             |
|                                                                                             | Posture                      |
|                                                                                             | Muscle Strength              |
|                                                                                             | Gait                         |
|                                                                                             | Mobility Limitation          |
|                                                                                             | Exercise movement techniques |
|                                                                                             | Walking                      |
|                                                                                             | Rehabilitation               |
|                                                                                             | Dance therapy                |
|                                                                                             | Occupational therapy         |
|                                                                                             | Recreation therapy           |
| <b>KEYWORD SEARCH TERMS</b>                                                                 |                              |
| Vision*or visual*or eye*or sight adj3 (impair* or loss or disorder* or disease* or disabl*) | Exercise                     |
| Blindness                                                                                   | Physical* adj3 activ*        |
|                                                                                             | Danc*                        |

Vision related terms combined with "OR".

Physical activity terms combined with "OR".

Vision related and physical activity terms combined with "AND".

## Supplementary 2 - PRISMA Checklist

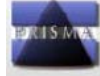

## PRISMA 2009 Checklist!

| Section/topic                      | #  | Checklist item                                                                                                                                                                                                                                                                                              | Reported on page # |
|------------------------------------|----|-------------------------------------------------------------------------------------------------------------------------------------------------------------------------------------------------------------------------------------------------------------------------------------------------------------|--------------------|
| <b>TITLE</b>                       |    |                                                                                                                                                                                                                                                                                                             |                    |
| Title                              | 1  | Identify the report as a systematic review, meta-analysis, or both.                                                                                                                                                                                                                                         | 1                  |
| <b>ABSTRACT</b>                    |    |                                                                                                                                                                                                                                                                                                             |                    |
| Structured summary                 | 2  | Provide a structured summary including, as applicable: background; objectives; data sources; study eligibility criteria, participants, and interventions; study appraisal and synthesis methods; results; limitations; conclusions and implications of key findings; systematic review registration number. | 2                  |
| <b>INTRODUCTION</b>                |    |                                                                                                                                                                                                                                                                                                             |                    |
| Rationale                          | 3  | Describe the rationale for the review in the context of what is already known.                                                                                                                                                                                                                              | 4-6                |
| Objectives                         | 4  | Provide an explicit statement of questions being addressed with reference to participants, interventions, comparisons, outcomes, and study design (PICOS).                                                                                                                                                  | 5-6                |
| <b>METHODS</b>                     |    |                                                                                                                                                                                                                                                                                                             |                    |
| Protocol and registration          | 5  | Indicate if a review protocol exists, if and where it can be accessed (e.g., Web address), and, if available, provide registration information including registration number.                                                                                                                               | 7                  |
| Eligibility criteria               | 6  | Specify study characteristics (e.g., PICOS, length of follow-up) and report characteristics (e.g., years considered, language, publication status) used as criteria for eligibility, giving rationale.                                                                                                      | 7                  |
| Information sources                | 7  | Describe all information sources (e.g., databases with dates of coverage, contact with study authors to identify additional studies) in the search and date last searched.                                                                                                                                  | 8                  |
| Search                             | 8  | Present full electronic search strategy for at least one database, including any limits used, such that it could be repeated.                                                                                                                                                                               | Supp 1             |
| Study selection                    | 9  | State the process for selecting studies (i.e., screening, eligibility, included in systematic review, and, if applicable, included in the meta-analysis).                                                                                                                                                   | 6-7                |
| Data collection process            | 10 | Describe method of data extraction from reports (e.g., piloted forms, independently, in duplicate) and any processes for obtaining and confirming data from investigators.                                                                                                                                  | 8-9                |
| Data items                         | 11 | List and define all variables for which data were sought (e.g., PICOS, funding sources) and any assumptions and simplifications made.                                                                                                                                                                       | 8-9                |
| Risk of bias in individual studies | 12 | Describe methods used for assessing risk of bias of individual studies (including specification of whether this was done at the study or outcome level), and how this information is to be used in any data synthesis.                                                                                      | 9                  |
| Summary measures                   | 13 | State the principal summary measures (e.g., risk ratio, difference in means).                                                                                                                                                                                                                               | 9                  |
| Synthesis of results               | 14 | Describe the methods of handling data and combining results of studies, if done, including measures of consistency (e.g., $I^2$ ) for each meta-analysis.                                                                                                                                                   | 9                  |





## PRISMA 2009 Checklist!

| Section/topic                 | #  | Checklist item                                                                                                                                                                                           | Reported on page # |
|-------------------------------|----|----------------------------------------------------------------------------------------------------------------------------------------------------------------------------------------------------------|--------------------|
| Risk of bias across studies   | 15 | Specify any assessment of risk of bias that may affect the cumulative evidence (e.g., publication bias, selective reporting within studies).                                                             | 9                  |
| Additional analyses           | 16 | Describe methods of additional analyses (e.g., sensitivity or subgroup analyses, meta-regression), if done, indicating which were pre-specified.                                                         | NA                 |
| <b>RESULTS</b>                |    |                                                                                                                                                                                                          |                    |
| Study selection               | 17 | Give numbers of studies screened, assessed for eligibility, and included in the review, with reasons for exclusions at each stage, ideally with a flow diagram.                                          | 10, Fig 1          |
| Study characteristics         | 18 | For each study, present characteristics for which data were extracted (e.g., study size, PICOS, follow-up period) and provide the citations.                                                             | 10-15              |
| Risk of bias within studies   | 19 | Present data on risk of bias of each study and, if available, any outcome level assessment (see item 12).                                                                                                | 17-18              |
| Results of individual studies | 20 | For all outcomes considered (benefits or harms), present, for each study: (a) simple summary data for each intervention group (b) effect estimates and confidence intervals, ideally with a forest plot. | Fig 2              |
| Synthesis of results          | 21 | Present results of each meta-analysis done, including confidence intervals and measures of consistency.                                                                                                  | Fig 2              |
| Risk of bias across studies   | 22 | Present results of any assessment of risk of bias across studies (see Item 15).                                                                                                                          | 18                 |
| Additional analysis           | 23 | Give results of additional analyses, if done (e.g., sensitivity or subgroup analyses, meta-regression [see Item 16]).                                                                                    | NA                 |
| <b>DISCUSSION</b>             |    |                                                                                                                                                                                                          |                    |
| Summary of evidence           | 24 | Summarize the main findings including the strength of evidence for each main outcome; consider their relevance to key groups (e.g., healthcare providers, users, and policy makers).                     | 19-22              |
| Limitations                   | 25 | Discuss limitations at study and outcome level (e.g., risk of bias), and at review-level (e.g., incomplete retrieval of identified research, reporting bias).                                            | 21-22              |
| Conclusions                   | 26 | Provide a general interpretation of the results in the context of other evidence, and implications for future research.                                                                                  | 22                 |
| <b>FUNDING</b>                |    |                                                                                                                                                                                                          |                    |
| Funding                       | 27 | Describe sources of funding for the systematic review and other support (e.g., supply of data); role of funders for the systematic review.                                                               | 23                 |

From: Moher D, Liberati A, Tetzlaff J, Altman DG, The PRISMA Group (2009). Preferred Reporting Items for Systematic Reviews and Meta-Analyses: The PRISMA Statement. PLoS Med 6(7): e1000097. doi:10.1371/journal.pmed1000097

For more information, visit: [www.prisma-statement.org](http://www.prisma-statement.org).

## Supplementary 3 - AMSTAR 2 Checklist

AMSTAR 2: a critical appraisal tool for systematic reviews that include randomised or non-randomised studies of healthcare interventions, or both

|                                                                                                                                                                                                                           |                                                                                                        |                                                 |
|---------------------------------------------------------------------------------------------------------------------------------------------------------------------------------------------------------------------------|--------------------------------------------------------------------------------------------------------|-------------------------------------------------|
| <b>1. Did the research questions and inclusion criteria for the review include the components of PICO?</b>                                                                                                                |                                                                                                        |                                                 |
| For Yes:                                                                                                                                                                                                                  | Optional (recommended)                                                                                 |                                                 |
| <input checked="" type="checkbox"/> Population                                                                                                                                                                            | <input type="checkbox"/> Timeframe for follow-up                                                       | <input checked="" type="checkbox"/> Yes         |
| <input checked="" type="checkbox"/> Intervention                                                                                                                                                                          |                                                                                                        | <input type="checkbox"/> No                     |
| <input checked="" type="checkbox"/> Comparator group                                                                                                                                                                      |                                                                                                        |                                                 |
| <input checked="" type="checkbox"/> Outcome                                                                                                                                                                               |                                                                                                        |                                                 |
| <b>2. Did the report of the review contain an explicit statement that the review methods were established prior to the conduct of the review and did the report justify any significant deviations from the protocol?</b> |                                                                                                        |                                                 |
| For Partial Yes:<br>The authors state that they had a written protocol or guide that included ALL the following:                                                                                                          | For Yes:<br>As for partial yes, plus the protocol should be registered and should also have specified: |                                                 |
| <input checked="" type="checkbox"/> review question(s)                                                                                                                                                                    | <input type="checkbox"/> a meta-analysis/synthesis plan, if appropriate, <i>and</i>                    | <input type="checkbox"/> Yes                    |
| <input checked="" type="checkbox"/> a search strategy                                                                                                                                                                     | <input type="checkbox"/> a plan for investigating causes of heterogeneity                              | <input checked="" type="checkbox"/> Partial Yes |
| <input checked="" type="checkbox"/> inclusion/exclusion criteria                                                                                                                                                          | <input type="checkbox"/> justification for any deviations from the protocol                            | <input type="checkbox"/> No                     |
| <input checked="" type="checkbox"/> a risk of bias assessment                                                                                                                                                             |                                                                                                        |                                                 |
| <b>3. Did the review authors explain their selection of the study designs for inclusion in the review?</b>                                                                                                                |                                                                                                        |                                                 |
| For Yes, the review should satisfy ONE of the following:                                                                                                                                                                  |                                                                                                        |                                                 |
| <input type="checkbox"/> <i>Explanation for including only RCTs</i>                                                                                                                                                       |                                                                                                        | <input checked="" type="checkbox"/> Yes         |
| <input type="checkbox"/> <i>OR Explanation for including only NRSI</i>                                                                                                                                                    |                                                                                                        | <input type="checkbox"/> No                     |
| <input checked="" type="checkbox"/> <i>OR Explanation for including both RCTs and NRSI</i>                                                                                                                                |                                                                                                        |                                                 |
| <b>4. Did the review authors use a comprehensive literature search strategy?</b>                                                                                                                                          |                                                                                                        |                                                 |
| For Partial Yes (all the following):                                                                                                                                                                                      | For Yes, should also have (all the following):                                                         |                                                 |
| <input checked="" type="checkbox"/> searched at least 2 databases (relevant to research question)                                                                                                                         | <input checked="" type="checkbox"/> searched the reference lists / bibliographies of included studies  | <input checked="" type="checkbox"/> Yes         |
| <input checked="" type="checkbox"/> provided key word and/or search strategy                                                                                                                                              | <input checked="" type="checkbox"/> searched trial/study registries                                    | <input type="checkbox"/> Partial Yes            |
| <input checked="" type="checkbox"/> justified publication restrictions (e.g. language)                                                                                                                                    | <input checked="" type="checkbox"/> included/consulted content experts in the field                    | <input type="checkbox"/> No                     |
|                                                                                                                                                                                                                           | <input checked="" type="checkbox"/> where relevant, searched for grey literature                       |                                                 |
|                                                                                                                                                                                                                           | <input checked="" type="checkbox"/> conducted search within 24 months of completion of the review      |                                                 |
| <b>5. Did the review authors perform study selection in duplicate?</b>                                                                                                                                                    |                                                                                                        |                                                 |
| For Yes, either ONE of the following:                                                                                                                                                                                     |                                                                                                        |                                                 |
| <input checked="" type="checkbox"/> at least two reviewers independently agreed on selection of eligible studies and achieved consensus on which studies to include                                                       |                                                                                                        | <input checked="" type="checkbox"/> Yes         |
| <input type="checkbox"/> OR two reviewers selected a sample of eligible studies <u>and</u> achieved good agreement (at least 80 percent), with the remainder selected by one reviewer.                                    |                                                                                                        | <input type="checkbox"/> No                     |

AMSTAR 2: a critical appraisal tool for systematic reviews that include randomised or non-randomised studies of healthcare interventions, or both

|                                                                                                                                                                                                                                                        |                                                                                                                                          |                                                                                                                    |
|--------------------------------------------------------------------------------------------------------------------------------------------------------------------------------------------------------------------------------------------------------|------------------------------------------------------------------------------------------------------------------------------------------|--------------------------------------------------------------------------------------------------------------------|
| <b>6. Did the review authors perform data extraction in duplicate?</b>                                                                                                                                                                                 |                                                                                                                                          |                                                                                                                    |
| For Yes, either ONE of the following:                                                                                                                                                                                                                  |                                                                                                                                          |                                                                                                                    |
| <input checked="" type="checkbox"/> at least two reviewers achieved consensus on which data to extract from included studies                                                                                                                           | <input checked="" type="checkbox"/> Yes                                                                                                  | <input type="checkbox"/> No                                                                                        |
| <input type="checkbox"/> OR two reviewers extracted data from a sample of eligible studies <u>and</u> achieved good agreement (at least 80 percent), with the remainder extracted by one reviewer.                                                     |                                                                                                                                          |                                                                                                                    |
| <b>7. Did the review authors provide a list of excluded studies and justify the exclusions?</b>                                                                                                                                                        |                                                                                                                                          |                                                                                                                    |
| For Partial Yes:                                                                                                                                                                                                                                       | For Yes, must also have:                                                                                                                 |                                                                                                                    |
| <input type="checkbox"/> provided a list of all potentially relevant studies that were read in full-text form but excluded from the review                                                                                                             | <input type="checkbox"/> Justified the exclusion from the review of each potentially relevant study                                      | <input type="checkbox"/> Yes<br><input type="checkbox"/> Partial Yes<br><input checked="" type="checkbox"/> No     |
| <b>8. Did the review authors describe the included studies in adequate detail?</b>                                                                                                                                                                     |                                                                                                                                          |                                                                                                                    |
| For Partial Yes (ALL the following):                                                                                                                                                                                                                   | For Yes, should also have ALL the following:                                                                                             |                                                                                                                    |
| <input checked="" type="checkbox"/> described populations                                                                                                                                                                                              | <input checked="" type="checkbox"/> described population in detail                                                                       | <input checked="" type="checkbox"/> Yes                                                                            |
| <input checked="" type="checkbox"/> described interventions                                                                                                                                                                                            | <input checked="" type="checkbox"/> described intervention in detail (including doses where relevant)                                    | <input type="checkbox"/> Partial Yes                                                                               |
| <input checked="" type="checkbox"/> described comparators                                                                                                                                                                                              | <input checked="" type="checkbox"/> described comparator in detail (including doses where relevant)                                      | <input type="checkbox"/> No                                                                                        |
| <input checked="" type="checkbox"/> described outcomes                                                                                                                                                                                                 | <input checked="" type="checkbox"/> described study's setting                                                                            |                                                                                                                    |
| <input checked="" type="checkbox"/> described research designs                                                                                                                                                                                         | <input checked="" type="checkbox"/> timeframe for follow-up                                                                              |                                                                                                                    |
| <b>9. Did the review authors use a satisfactory technique for assessing the risk of bias (RoB) in individual studies that were included in the review?</b>                                                                                             |                                                                                                                                          |                                                                                                                    |
| <b>RCTs</b>                                                                                                                                                                                                                                            |                                                                                                                                          |                                                                                                                    |
| For Partial Yes, must have assessed RoB from                                                                                                                                                                                                           | For Yes, must also have assessed RoB from:                                                                                               |                                                                                                                    |
| <input checked="" type="checkbox"/> unconcealed allocation, <i>and</i>                                                                                                                                                                                 | <input checked="" type="checkbox"/> allocation sequence that was not truly random, <i>and</i>                                            | <input checked="" type="checkbox"/> Yes                                                                            |
| <input checked="" type="checkbox"/> lack of blinding of patients and assessors when assessing outcomes (unnecessary for objective outcomes such as all-cause mortality)                                                                                | <input checked="" type="checkbox"/> selection of the reported result from among multiple measurements or analyses of a specified outcome | <input type="checkbox"/> Partial Yes<br><input type="checkbox"/> No<br><input type="checkbox"/> Includes only NRSI |
| <b>NRSI</b>                                                                                                                                                                                                                                            |                                                                                                                                          |                                                                                                                    |
| For Partial Yes, must have assessed RoB:                                                                                                                                                                                                               | For Yes, must also have assessed RoB:                                                                                                    |                                                                                                                    |
| <input checked="" type="checkbox"/> from confounding, <i>and</i>                                                                                                                                                                                       | <input checked="" type="checkbox"/> methods used to ascertain exposures and outcomes, <i>and</i>                                         | <input checked="" type="checkbox"/> Yes                                                                            |
| <input checked="" type="checkbox"/> from selection bias                                                                                                                                                                                                | <input checked="" type="checkbox"/> selection of the reported result from among multiple measurements or analyses of a specified outcome | <input type="checkbox"/> Partial Yes<br><input type="checkbox"/> No<br><input type="checkbox"/> Includes only RCTs |
| <b>10. Did the review authors report on the sources of funding for the studies included in the review?</b>                                                                                                                                             |                                                                                                                                          |                                                                                                                    |
| For Yes                                                                                                                                                                                                                                                |                                                                                                                                          |                                                                                                                    |
| <input checked="" type="checkbox"/> Must have reported on the sources of funding for individual studies included in the review. Note: Reporting that the reviewers looked for this information but it was not reported by study authors also qualifies | <input checked="" type="checkbox"/> Yes                                                                                                  | <input type="checkbox"/> No                                                                                        |

AMSTAR 2: a critical appraisal tool for systematic reviews that include randomised or non-randomised studies of healthcare interventions, or both

**11. If meta-analysis was performed did the review authors use appropriate methods for statistical combination of results?**

**RCTs**

For Yes:

- |                                                                                                                                                         |                                                     |
|---------------------------------------------------------------------------------------------------------------------------------------------------------|-----------------------------------------------------|
| <input checked="" type="checkbox"/> The authors justified combining the data in a meta-analysis                                                         | <input checked="" type="checkbox"/> Yes             |
| <input checked="" type="checkbox"/> AND they used an appropriate weighted technique to combine study results and adjusted for heterogeneity if present. | <input type="checkbox"/> No                         |
| <input checked="" type="checkbox"/> AND investigated the causes of any heterogeneity                                                                    | <input type="checkbox"/> No meta-analysis conducted |

**For NRSI**

For Yes:

- |                                                                                                                                                                                                                                           |                                                                |
|-------------------------------------------------------------------------------------------------------------------------------------------------------------------------------------------------------------------------------------------|----------------------------------------------------------------|
| <input type="checkbox"/> The authors justified combining the data in a meta-analysis                                                                                                                                                      | <input type="checkbox"/> Yes                                   |
| <input type="checkbox"/> AND they used an appropriate weighted technique to combine study results, adjusting for heterogeneity if present                                                                                                 | <input type="checkbox"/> No                                    |
| <input type="checkbox"/> AND they statistically combined effect estimates from NRSI that were adjusted for confounding, rather than combining raw data, or justified combining raw data when adjusted effect estimates were not available | <input checked="" type="checkbox"/> No meta-analysis conducted |
| <input type="checkbox"/> AND they reported separate summary estimates for RCTs and NRSI separately when both were included in the review                                                                                                  |                                                                |

**12. If meta-analysis was performed, did the review authors assess the potential impact of RoB in individual studies on the results of the meta-analysis or other evidence synthesis?**

For Yes:

- |                                                                                                                                                                                                                    |                                                     |
|--------------------------------------------------------------------------------------------------------------------------------------------------------------------------------------------------------------------|-----------------------------------------------------|
| <input type="checkbox"/> included only low risk of bias RCTs                                                                                                                                                       | <input checked="" type="checkbox"/> Yes             |
| <input checked="" type="checkbox"/> OR, if the pooled estimate was based on RCTs and/or NRSI at variable RoB, the authors performed analyses to investigate possible impact of RoB on summary estimates of effect. | <input type="checkbox"/> No                         |
|                                                                                                                                                                                                                    | <input type="checkbox"/> No meta-analysis conducted |

**13. Did the review authors account for RoB in individual studies when interpreting/ discussing the results of the review?**

For Yes:

- |                                                                                                                                                                              |                                         |
|------------------------------------------------------------------------------------------------------------------------------------------------------------------------------|-----------------------------------------|
| <input type="checkbox"/> included only low risk of bias RCTs                                                                                                                 | <input checked="" type="checkbox"/> Yes |
| <input checked="" type="checkbox"/> OR, if RCTs with moderate or high RoB, or NRSI were included the review provided a discussion of the likely impact of RoB on the results | <input type="checkbox"/> No             |

**14. Did the review authors provide a satisfactory explanation for, and discussion of, any heterogeneity observed in the results of the review?**

For Yes:

- |                                                                                                                                                                                                                         |                                         |
|-------------------------------------------------------------------------------------------------------------------------------------------------------------------------------------------------------------------------|-----------------------------------------|
| <input type="checkbox"/> There was no significant heterogeneity in the results                                                                                                                                          |                                         |
| <input checked="" type="checkbox"/> OR if heterogeneity was present the authors performed an investigation of sources of any heterogeneity in the results and discussed the impact of this on the results of the review | <input checked="" type="checkbox"/> Yes |
|                                                                                                                                                                                                                         | <input type="checkbox"/> No             |

**15. If they performed quantitative synthesis did the review authors carry out an adequate investigation of publication bias (small study bias) and discuss its likely impact on the results of the review?**

For Yes:

- |                                                                                                                                                                            |                                                     |
|----------------------------------------------------------------------------------------------------------------------------------------------------------------------------|-----------------------------------------------------|
| <input checked="" type="checkbox"/> performed graphical or statistical tests for publication bias and discussed the likelihood and magnitude of impact of publication bias | <input checked="" type="checkbox"/> Yes             |
|                                                                                                                                                                            | <input type="checkbox"/> No                         |
|                                                                                                                                                                            | <input type="checkbox"/> No meta-analysis conducted |

1 AMSTAR 2: a critical appraisal tool for systematic reviews that include randomised or non-  
2 randomised studies of healthcare interventions, or both  
3

4 **16. Did the review authors report any potential sources of conflict of interest, including any funding**  
5 **they received for conducting the review?**

6 For Yes:

- |                                                                                                                                  |                                           |
|----------------------------------------------------------------------------------------------------------------------------------|-------------------------------------------|
| 7 <input checked="" type="checkbox"/> The authors reported no competing interests OR                                             | 7 <input checked="" type="checkbox"/> Yes |
| 8 <input type="checkbox"/> The authors described their funding sources and how they managed<br>9 potential conflicts of interest | 8 <input type="checkbox"/> No             |

10  
11  
12 **To cite this tool:** Shea BJ, Reeves BC, Wells G, Thuku M, Hamel C, Moran J, Moher D, Tugwell P,  
13 Welch V, Kristjansson E, Henry DA. AMSTAR 2: a critical appraisal tool for systematic reviews that  
14 include randomised or non-randomised studies of healthcare interventions, or both. BMJ. 2017 Sep  
15 21;358:j4008.  
16  
17  
18  
19  
20  
21  
22  
23  
24  
25  
26  
27  
28  
29  
30  
31  
32  
33  
34  
35  
36  
37  
38  
39  
40  
41  
42  
43  
44  
45  
46  
47  
48  
49  
50  
51  
52  
53  
54  
55  
56  
57  
58  
59  
60

## Supplementary Material 4. Characteristics of included intervention studies

| First author, year (setting) | Study Design | Participants                                                                                                                                                                                                                  | Intervention (Description and Dose)                                                                                                                                                                                                                                                                                                                                                                                                              | Control                                            | Outcomes                                                                                                                | Results                                                                                                                                                                                                                                                                                                                                                                                                   |
|------------------------------|--------------|-------------------------------------------------------------------------------------------------------------------------------------------------------------------------------------------------------------------------------|--------------------------------------------------------------------------------------------------------------------------------------------------------------------------------------------------------------------------------------------------------------------------------------------------------------------------------------------------------------------------------------------------------------------------------------------------|----------------------------------------------------|-------------------------------------------------------------------------------------------------------------------------|-----------------------------------------------------------------------------------------------------------------------------------------------------------------------------------------------------------------------------------------------------------------------------------------------------------------------------------------------------------------------------------------------------------|
| Ackley-Holbrook, 2016 (USA)  | Pre Post     | Severe VI or blindness. Recruited through advocacy organizations, online discussion groups and communities, word-of-mouth. Aged $\geq 18$ yrs. Mean age = $47.9 \pm 11.5$ yrs. % Males = UNK n = 21                           | Walking program; 8 weeks, increasing daily step count by 1000 above baseline, progressively higher targets every 2 weeks                                                                                                                                                                                                                                                                                                                         | Baseline step count                                | Daily step count (by pedometer), resting heart rate, blood pressure, body mass, % body fat, waist circumference, lipids | Significant increase in steps per day; (baseline $4925 \pm 2233$ v post $8772 \pm 2916$ , $p < 0.01$ ). No significant differences in other measures. Reported improvements in cardiovascular endurance and productivity (93%), mood and mental health (73%), outlook on life, self confidence and functional mobility (67%).                                                                             |
| Campbell, 2005 (NZ)          | RCT          | Visual acuity of 6/24 or worse. Recruited via register for the blind, hospital outpatient clinics, private ophthalmology practice. Living in community. Aged $\geq 75$ . Mean age = $83.6 \pm 4.8$ yrs % Males = 32% n = 391  | Four groups; 1) Otago exercise program (Muscle strengthening and balance retraining exercises that progress in difficulty) and walking plan; 5 home visits from a physiotherapist, 3 X 30min per week of exercises plus walking twice a week. n=97 2) Home safety program (Home visit to identify hazards and provision of recommendations to prevent falls). n=100 3) Exercise and home safety program. n=98 4) Control (social visits). n = 96 | Two social visits during the first six months      | Number of falls and fall related injuries                                                                               | 15% more falls observed in the exercise program (incidence rate ratio = 0.59 [CI 0.42-0.83] v 1.15 [CI 0.82-1.61], however a higher level of adherence led to fewer falls ( $p=0.001$ ). 41% fewer falls in the home safety program. One year of follow up.                                                                                                                                               |
| Chen, 2012 (HK)              | RCT          | Low vision (6/18 - 3/60) and blind (3/60 or worse). Living in a residential care home. Aged $\geq 70$ . Mean age = $85.5 \pm 6.9$ yrs (experimental) and $82.9 \pm 7.5$ yrs (control) % Males = UNK n = 40                    | Modified 8-form Yang style Tai Chi, emphasizing multi-directional weight shifting, head and trunk rotation and awareness of body alignment; 1.5 hours, 3 times a week, for 16 weeks. n = 21 in intervention                                                                                                                                                                                                                                      | Music percussion activity (djembe i.e. drumming)   | Knee proprioception, muscle strength (in knee extensors and flexors), balance                                           | Experimental group showed significant improvements in knee proprioception (percentage change of absolute angle error = $-25.9 \pm 28.8\%$ v $4.2 \pm 30.7\%$ , $p=0.032$ ) and balance control (greater percentage change in visual ratio ( $58.1 \pm 41.9\%$ v $-1.6 \pm 29.4\%$ , $p=0.006$ ) and vestibular ratio ( $32.5 \pm 40.2\%$ v $-17.8 \pm 56.8\%$ , $p=0.048$ ). Intention to treat analysis. |
| Cheung, 2008 (HK)            | RCT          | No light perception or VI of 6/120 or worse in better eye with corrective device. Living in care and attention homes. Aged $\geq 65$ . Mean age = $83 \pm 4.7$ yrs (experimental) and $84 \pm 6.5$ yrs (control) % Males = 0% | Structured, individually tailored exercise program designed by a physiotherapist, including warm up, lower limb strengthening exercises (increasing in repetitions and weights), balance exercises. Plus routine group physical activity. 3 X 45 min per week, for 12 weeks n = 27 in intervention.                                                                                                                                              | Routine group physical activity only in care home. | Balance and muscle strength.                                                                                            | Significant improvements in BBS (9.4%, $p < 0.000$ ), TUG (decrease of 4.7 sec, $p < 0.0003$ ) and CST (decrease of 2.35 sec, $p=0.047$ )                                                                                                                                                                                                                                                                 |

|                        |          |                                                                                                                                                                                                                                                                   |                                                                                                                                                                      |                                             |                                                                                                                                                         |                                                                                                                                                                                                                                                                                                                                                                                                                                                                                                                                                                                                                                               |
|------------------------|----------|-------------------------------------------------------------------------------------------------------------------------------------------------------------------------------------------------------------------------------------------------------------------|----------------------------------------------------------------------------------------------------------------------------------------------------------------------|---------------------------------------------|---------------------------------------------------------------------------------------------------------------------------------------------------------|-----------------------------------------------------------------------------------------------------------------------------------------------------------------------------------------------------------------------------------------------------------------------------------------------------------------------------------------------------------------------------------------------------------------------------------------------------------------------------------------------------------------------------------------------------------------------------------------------------------------------------------------------|
|                        |          | n = 50                                                                                                                                                                                                                                                            |                                                                                                                                                                      |                                             |                                                                                                                                                         |                                                                                                                                                                                                                                                                                                                                                                                                                                                                                                                                                                                                                                               |
| Gleeson, 2015 (AUS)    | RCT      | Participants recruited from Guide Dogs Australia. Aged $\geq 50$ . Mean age = $75 \pm 11$ yrs. % Males = 29% n = 120                                                                                                                                              | Alexander Technique, 1 X 30 min lesson per week, for 12 weeks, plus usual care. n = 60 in intervention.                                                              | Usual care from Guide Dogs Australia.       | Short Physical Performance Battery (sit-to-stand, 4m walk test, standing balance test). Postural sway tests, maximal balance range and number of falls. | No statistically significant improvements in primary outcomes at 3 or 12 months between groups. Intervention group reduced postural sway on a firm surface (eyes open) at 3mths ( $-29.59\text{mm}$ , $P<0.01$ ).                                                                                                                                                                                                                                                                                                                                                                                                                             |
| Gleeson, 2017 (AUS)    | RCT      | As per Gleeson 2015                                                                                                                                                                                                                                               | As per Gleeson 2015,                                                                                                                                                 | As per Gleeson 2015                         | Social and emotional wellbeing                                                                                                                          | No statistically significant improvements at 3 or 12 months. Emotional subscale approached significance ( $p=0.06$ ) in favor of intervention at three mths.                                                                                                                                                                                                                                                                                                                                                                                                                                                                                  |
| Hackney, 2015 (USA)    | RCT      | VI in range 20/30 – 20/632. Recruited from Medical Centre, Senior Independent Living communities, community senior centres. Mean age = $79.3 \pm 11$ yrs % Males = 47% n = 32                                                                                     | Adapted Tango Classes, 2 X 1.5 hours per week, for 10-12 weeks (total 30 hours). n = 14 Tango intervention.                                                          | FallProof Program                           | Balance, Mobility, Gait speed and quality-of-life.                                                                                                      | Tango and FallProof groups showed improvements on BBS ( $p=0.001$ ). SOT scores improved by 14% in Tango group and 22% in FallProof. Tango group significantly improved on 6MWT ( $p=0.016$ ), cognitive-TUG( $p=0.03$ ) and gait ( $p<0.001$ ). Last observation carried forward analysis.                                                                                                                                                                                                                                                                                                                                                   |
| Jeter, 2012 (USA)      | Pre Post | Visual field $<20$ deg and/or visual acuity $< 20/200$ . Recruited from Low Vision Clinic of tertiary hospital and local community based listings. Mean age = $46 \pm 12$ yrs. % Males = 30% n = 10                                                               | Ashtanga-Based Yoga (AYT), 1 X orientation session, 1 class per week and 2 sessions per week at home, for 8 weeks.                                                   | None                                        | Sleep, anxiety, depression, stress, balance, respiratory rate, mindfulness, balance                                                                     | Improvements observed in all pre-post measures (descriptive analysis only). Exit surveys showed 5/8 reported reduced stress, 3/8 reported improved sleep. 7/8 reported improved relaxation and focus. 8/8 expressed an interest in a yoga program like this in the future. 8/8 subjects were extremely or mostly satisfied with program.                                                                                                                                                                                                                                                                                                      |
| Jeter 2015 (USA)       | RCT      | Corrected visual acuity worse than 20/200 and/or visual field less than 20 deg in diameter (legal blindness). Recruited from Low Vision Clinic of tertiary hospital. Mean age = $55 \pm 17$ yrs (experimental) and $55 \pm 10$ yrs (control) % Males = 29% n = 21 | Ashtanga-Based Yoga (AYT), 1 X orientation session, 1 class per week and 2 sessions per week at home, for 8 weeks. n = 11 in intervention                            | Waitlist Control                            | Postural stability, balance, physical function                                                                                                          | Absolute values of mean total velocity significantly increased in AYT group (Eyes Open; $t(8)=-3.66$ , $p=0.01$ and Eyes Closed; $t(8)=-3.90$ , $p=0.01$ ). Significant baseline post AYT increase in somatosensory contribution to balance SI velocity (Eyes Open; $t(8)=-2.42$ , $p=0.04$ and Eyes Closed; $t(8)=-3.96$ , $p=0.01$ ). Significant increase in vestibular contribution to balance ( $t(8)=-2.47$ , $p=0.04$ ). Significant increase in one leg stand ( $z=-2.10$ , $p=0.04$ ), chair sit and reach ( $z=2.22$ , $p=0.01$ ), and 30s chair stand ( $z=-1.98$ , $p=0.05$ ) following AYT program. No changes in control group. |
| Kingston, 2018 (USA)   | Pre Post | No definition of blindness reported. Recruited from Blind Centre. Mean age = 80 yrs. % Males = 88% n = 24                                                                                                                                                         | Matter of Balance program (CBT and exercise training in 6 of 8 sessions; Tennstedt, 1998 ). 2 X 2 hours per week for 4 weeks.                                        | None                                        | Mobility and balance                                                                                                                                    | Mean decrease of 2.15 sec on TUG, small increase in total POMA (1.5 points)                                                                                                                                                                                                                                                                                                                                                                                                                                                                                                                                                                   |
| Kovács, 2012 (Hungary) | RCT      | Visual acuity 20/30-20/400. Recruited from National Institution for Blind People. Aged $\geq 60$ years and over.                                                                                                                                                  | Multimodal program - balance and strength exercises based on Otago Exercise Program, using increasing weights. Included 20-30min/day walking program. 30min X 2 week | Standard osteoporosis program alone (4Xwk). | Balance, everyday living activities, mobility, falls                                                                                                    | Significant improvements in experimental group pre and post intervention (BBS $41.81 \pm 7.52$ v $45.09 \pm 7.41$ $p=0.036$ , TUG $20.72 \pm 4.87$ v $17.93 \pm 4.96$ $p<0.005$ ). TUG time differed significantly between experimental and control ( $p=0.001$ ). Number of falls = 22.                                                                                                                                                                                                                                                                                                                                                      |

|                         |          |                                                                                                                                                                                                                                                                                                            |                                                                                                                                                                                                                                                           |                 |                                                                                                                       |                                                                                                                                                                                                                                                                                                                                                                 |
|-------------------------|----------|------------------------------------------------------------------------------------------------------------------------------------------------------------------------------------------------------------------------------------------------------------------------------------------------------------|-----------------------------------------------------------------------------------------------------------------------------------------------------------------------------------------------------------------------------------------------------------|-----------------|-----------------------------------------------------------------------------------------------------------------------|-----------------------------------------------------------------------------------------------------------------------------------------------------------------------------------------------------------------------------------------------------------------------------------------------------------------------------------------------------------------|
|                         |          | Mean age = 68.7 ± 6.9 yrs (experimental) and 69.7 ± 6.5 yrs (control).<br>% Males = 0%<br>n = 41                                                                                                                                                                                                           | multimodal exercise program + 2 X week standard osteoporosis program, for 6 months.<br>n = 21 in intervention                                                                                                                                             |                 |                                                                                                                       | Significantly shorter time to first fall in the control group (15 wks. V 19 weeks, p = 0.049).                                                                                                                                                                                                                                                                  |
| Larsson, 2006 (Sweden)  | Pre Post | Visual acuity of less than 0.05 in best eye or visual field less than 5 deg. Recruited from Low Vision Clinic.<br>Of working age.<br>Mean age = 52.3 ± 11.4 yrs<br>% Males = 14% (of final participants)<br>n = 8                                                                                          | Body awareness exercises and dance based training. 75min X 2 sessions week, for 8 weeks.                                                                                                                                                                  | None            | Balance, functional reach, functional balance, mobility, gait speed, Activity scale                                   | Statistically significant improvements observed in;<br>Functional reach = 6/7<br>TUG = 1/7<br>Max. Gait speed = 2/7<br>One leg stance (left) = 3/7<br>One leg stance (right) = 2/7<br>Max. Step length = 5/7                                                                                                                                                    |
| Miszko, 2004 (USA)      | Pre Post | Recruited from local rehabilitation centre.<br>Mean age = 52.6 ± 12.8 yrs.<br>% Males = 70%<br>n = 10                                                                                                                                                                                                      | Tai Chi Classes. 2 X 1 hour, per week for 8 weeks, 15min per day outside of class, plus regular orientation and mobility training.                                                                                                                        | None            | Muscular strength, work and power of knee; balance; functional reach and quality of life                              | Improvements seen in muscular strength (flexion 16.5%, extension 16.9%), power (flexion 30%, extension 6.8%), and work (flexion 17.7%, extension 17.1%), small change in functional reach (0.75%) and BBS (2%), improvement in single stance time (6.3%). Improvement in frequency, independence and satisfaction with performing mobility tasks after tai chi. |
| Ponchillia, 1992 (USA)  | Pre Post | Congenital total blindness. Recruited from University. Aged 24-37 yrs.<br>% Males = 0%<br>n = 3                                                                                                                                                                                                            | Aerobics sessions led by trained instructor including high and low impact movements. 2 X 50 minutes per week, for 7 weeks.                                                                                                                                | None            | Skinfolds, abdominal muscle strength and endurance, flexibility, heart rate, accuracy of performing tasks, step test. | Favorable changes in fitness based on step test, abdominal strength and endurance (24% mean increase on sit up test), body fat (mean 3.5% decrease) and accuracy of performance.                                                                                                                                                                                |
| Salari, 2013 (Iran)     | Pre Post | Blind athletes.<br>Mean age = 22.4 ± 5.4 yrs.<br>% Males = 0 %<br>n = 30                                                                                                                                                                                                                                   | Core stability training program. Approximately 3 X 1hr per week (every two days), for 8 weeks                                                                                                                                                             | None            | Balance (measured by Flamingo Test and Y balance)                                                                     | Significant increase in static and dynamic balance in anterior direction, internal posterior, external posterior and total balance.                                                                                                                                                                                                                             |
| Surakka, 2008 (Finland) | Pre Post | Partially sighted, blind or deaf-blind individuals.<br>Mean age = 54 ± 9.9 yrs.<br>% Males = 33% (of final participants)<br>n = 27                                                                                                                                                                         | Physical training including movements to improve balance, coordination, relax neck and shoulder muscles. 60 minutes 3 X per week for 5-6 weeks.                                                                                                           | None            | Physical condition, mental state and balance.                                                                         | Self reported improvements in physical condition (22/24), mental state (21/24) and balance (11/24). Main motivators were better physical condition (21/24) and peer group (12/24)                                                                                                                                                                               |
| Surakka, 2011 (Finland) | RCT      | Partially sighted (best corrected visual acuity < 0.3) or blind (visual acuity < 0.1, or visual field < 10 deg with glare and hemeralopia). Recruited from Rehabilitation Services at a tertiary hospital.<br>Mean age = 55 ± 9.0 yrs (experimental) and 57 ± 7.2yrs (control).<br>% Males = 45%<br>n = 29 | Physical training designed for VI and deaf-blind persons to improve balance, posture, coordination, tense neck and shoulder muscles, and loss of spinal rotation and reciprocal arm swing. 60 minutes 3 X per week for 5-6 weeks.<br>N=15 in intervention | No intervention | Flexibility                                                                                                           | Significant improvement in flexibility of trunk in the experimental v control group (p=0.0068).                                                                                                                                                                                                                                                                 |



|                                                       |                     |     |                                                                                                                                                                                                                                                 |                                                                                                                                                                                                                                                                                                                                                                          |                               |                                                                  |                                           |
|-------------------------------------------------------|---------------------|-----|-------------------------------------------------------------------------------------------------------------------------------------------------------------------------------------------------------------------------------------------------|--------------------------------------------------------------------------------------------------------------------------------------------------------------------------------------------------------------------------------------------------------------------------------------------------------------------------------------------------------------------------|-------------------------------|------------------------------------------------------------------|-------------------------------------------|
| 1<br>2<br>3<br>4<br>5<br>6<br>7<br>8<br>9<br>10<br>11 | Waterman, 2016 (UK) | RCT | Binocular visual acuity > 0.6, Snellen equivalent = 6/24 and/or moderate visual field loss (>20% of the test locations in a binocular Esterman test).<br>Recruited from the community.<br>Mean age = 81.4 ± 8.6 yrs.<br>% Males = 35%<br>n = 49 | Home Safety Arm (occupational therapist discussion with participants and action plan to alter environment to reduce risk of falls).<br>Home exercise program arm (based on Otago Exercise Program involving strength and balance exercises in addition to walking).<br>30min X 3 times per week plus walking X 2 times per week, for 6 months.<br>n = 17 in intervention | Usual care plus social visits | Number of falls, fear of falls, adherence rates, quality of life | No statistically significant differences. |
|-------------------------------------------------------|---------------------|-----|-------------------------------------------------------------------------------------------------------------------------------------------------------------------------------------------------------------------------------------------------|--------------------------------------------------------------------------------------------------------------------------------------------------------------------------------------------------------------------------------------------------------------------------------------------------------------------------------------------------------------------------|-------------------------------|------------------------------------------------------------------|-------------------------------------------|

12  
13  
14  
15  
16  
17  
18  
19  
20  
21  
22  
23  
24  
25  
26  
27  
28  
29  
30  
31  
32  
33  
34  
35  
36  
37  
38  
39  
40  
41  
42  
43  
44  
45  
46

Abbreviations: AUS = Australia, AYT = Ashtanga-Based Yoga, BBS = Berg Balance Score, CST = Chair Stand Test, HK = Hong Kong, NZ = New Zealand, POMA = Performance Oriented Mobility Assessment, RCT = Randomized Controlled Trial, SOT = Sensory organization test, 6MWT = Six minute walk test, TUG = Timed Up and Go, UK = United Kingdom, USA = United States of America, VI = visual impairment.

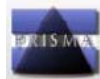

# PRISMA 2009 Checklist

| Section/topic                      | #  | Checklist item                                                                                                                                                                                                                                                                                              | Reported on page # |
|------------------------------------|----|-------------------------------------------------------------------------------------------------------------------------------------------------------------------------------------------------------------------------------------------------------------------------------------------------------------|--------------------|
| <b>TITLE</b>                       |    |                                                                                                                                                                                                                                                                                                             |                    |
| Title                              | 1  | Identify the report as a systematic review, meta-analysis, or both.                                                                                                                                                                                                                                         | 1                  |
| <b>ABSTRACT</b>                    |    |                                                                                                                                                                                                                                                                                                             |                    |
| Structured summary                 | 2  | Provide a structured summary including, as applicable: background; objectives; data sources; study eligibility criteria, participants, and interventions; study appraisal and synthesis methods; results; limitations; conclusions and implications of key findings; systematic review registration number. | 2                  |
| <b>INTRODUCTION</b>                |    |                                                                                                                                                                                                                                                                                                             |                    |
| Rationale                          | 3  | Describe the rationale for the review in the context of what is already known.                                                                                                                                                                                                                              | 4-6                |
| Objectives                         | 4  | Provide an explicit statement of questions being addressed with reference to participants, interventions, comparisons, outcomes, and study design (PICOS).                                                                                                                                                  | 5-6                |
| <b>METHODS</b>                     |    |                                                                                                                                                                                                                                                                                                             |                    |
| Protocol and registration          | 5  | Indicate if a review protocol exists, if and where it can be accessed (e.g., Web address), and, if available, provide registration information including registration number.                                                                                                                               | 7                  |
| Eligibility criteria               | 6  | Specify study characteristics (e.g., PICOS, length of follow-up) and report characteristics (e.g., years considered, language, publication status) used as criteria for eligibility, giving rationale.                                                                                                      | 7                  |
| Information sources                | 7  | Describe all information sources (e.g., databases with dates of coverage, contact with study authors to identify additional studies) in the search and date last searched.                                                                                                                                  | 8                  |
| Search                             | 8  | Present full electronic search strategy for at least one database, including any limits used, such that it could be repeated.                                                                                                                                                                               | Supp 1             |
| Study selection                    | 9  | State the process for selecting studies (i.e., screening, eligibility, included in systematic review, and, if applicable, included in the meta-analysis).                                                                                                                                                   | 6-7                |
| Data collection process            | 10 | Describe method of data extraction from reports (e.g., piloted forms, independently, in duplicate) and any processes for obtaining and confirming data from investigators.                                                                                                                                  | 8-9                |
| Data items                         | 11 | List and define all variables for which data were sought (e.g., PICOS, funding sources) and any assumptions and simplifications made.                                                                                                                                                                       | 8-9                |
| Risk of bias in individual studies | 12 | Describe methods used for assessing risk of bias of individual studies (including specification of whether this was done at the study or outcome level), and how this information is to be used in any data synthesis.                                                                                      | 9                  |
| Summary measures                   | 13 | State the principal summary measures (e.g., risk ratio, difference in means).                                                                                                                                                                                                                               | 9                  |
| Synthesis of results               | 14 | Describe the methods of handling data and combining results of studies, if done, including measures of consistency (e.g., $I^2$ ) for each meta-analysis.                                                                                                                                                   | 9                  |



# PRISMA 2009 Checklist

| Section/topic                 | #  | Checklist item                                                                                                                                                                                           | Reported on page # |
|-------------------------------|----|----------------------------------------------------------------------------------------------------------------------------------------------------------------------------------------------------------|--------------------|
| Risk of bias across studies   | 15 | Specify any assessment of risk of bias that may affect the cumulative evidence (e.g., publication bias, selective reporting within studies).                                                             | 9                  |
| Additional analyses           | 16 | Describe methods of additional analyses (e.g., sensitivity or subgroup analyses, meta-regression), if done, indicating which were pre-specified.                                                         | NA                 |
| <b>RESULTS</b>                |    |                                                                                                                                                                                                          |                    |
| Study selection               | 17 | Give numbers of studies screened, assessed for eligibility, and included in the review, with reasons for exclusions at each stage, ideally with a flow diagram.                                          | 10, Fig 1          |
| Study characteristics         | 18 | For each study, present characteristics for which data were extracted (e.g., study size, PICOS, follow-up period) and provide the citations.                                                             | 10-15              |
| Risk of bias within studies   | 19 | Present data on risk of bias of each study and, if available, any outcome level assessment (see item 12).                                                                                                | 17-18              |
| Results of individual studies | 20 | For all outcomes considered (benefits or harms), present, for each study: (a) simple summary data for each intervention group (b) effect estimates and confidence intervals, ideally with a forest plot. | Fig 2              |
| Synthesis of results          | 21 | Present results of each meta-analysis done, including confidence intervals and measures of consistency.                                                                                                  | Fig 2              |
| Risk of bias across studies   | 22 | Present results of any assessment of risk of bias across studies (see Item 15).                                                                                                                          | 18                 |
| Additional analysis           | 23 | Give results of additional analyses, if done (e.g., sensitivity or subgroup analyses, meta-regression [see Item 16]).                                                                                    | NA                 |
| <b>DISCUSSION</b>             |    |                                                                                                                                                                                                          |                    |
| Summary of evidence           | 24 | Summarize the main findings including the strength of evidence for each main outcome; consider their relevance to key groups (e.g., healthcare providers, users, and policy makers).                     | 19-22              |
| Limitations                   | 25 | Discuss limitations at study and outcome level (e.g., risk of bias), and at review-level (e.g., incomplete retrieval of identified research, reporting bias).                                            | 21-22              |
| Conclusions                   | 26 | Provide a general interpretation of the results in the context of other evidence, and implications for future research.                                                                                  | 22                 |
| <b>FUNDING</b>                |    |                                                                                                                                                                                                          |                    |
| Funding                       | 27 | Describe sources of funding for the systematic review and other support (e.g., supply of data); role of funders for the systematic review.                                                               | 23                 |

From: Moher D, Liberati A, Tetzlaff J, Altman DG, The PRISMA Group (2009). Preferred Reporting Items for Systematic Reviews and Meta-Analyses: The PRISMA Statement. PLoS Med 6(7): e1000097. doi:10.1371/journal.pmed1000097

For more information, visit: [www.prisma-statement.org](http://www.prisma-statement.org).
